# Supplementary material for: Beyond the Warburg Effect: Oxidative and Glycolytic Phenotypes Coexist within the Metabolic Heterogeneity of Glioblastoma
Source: PubMed Central journal article supplement (PMC7922554; doi:10.3390/cells10020202), 2021-01-20

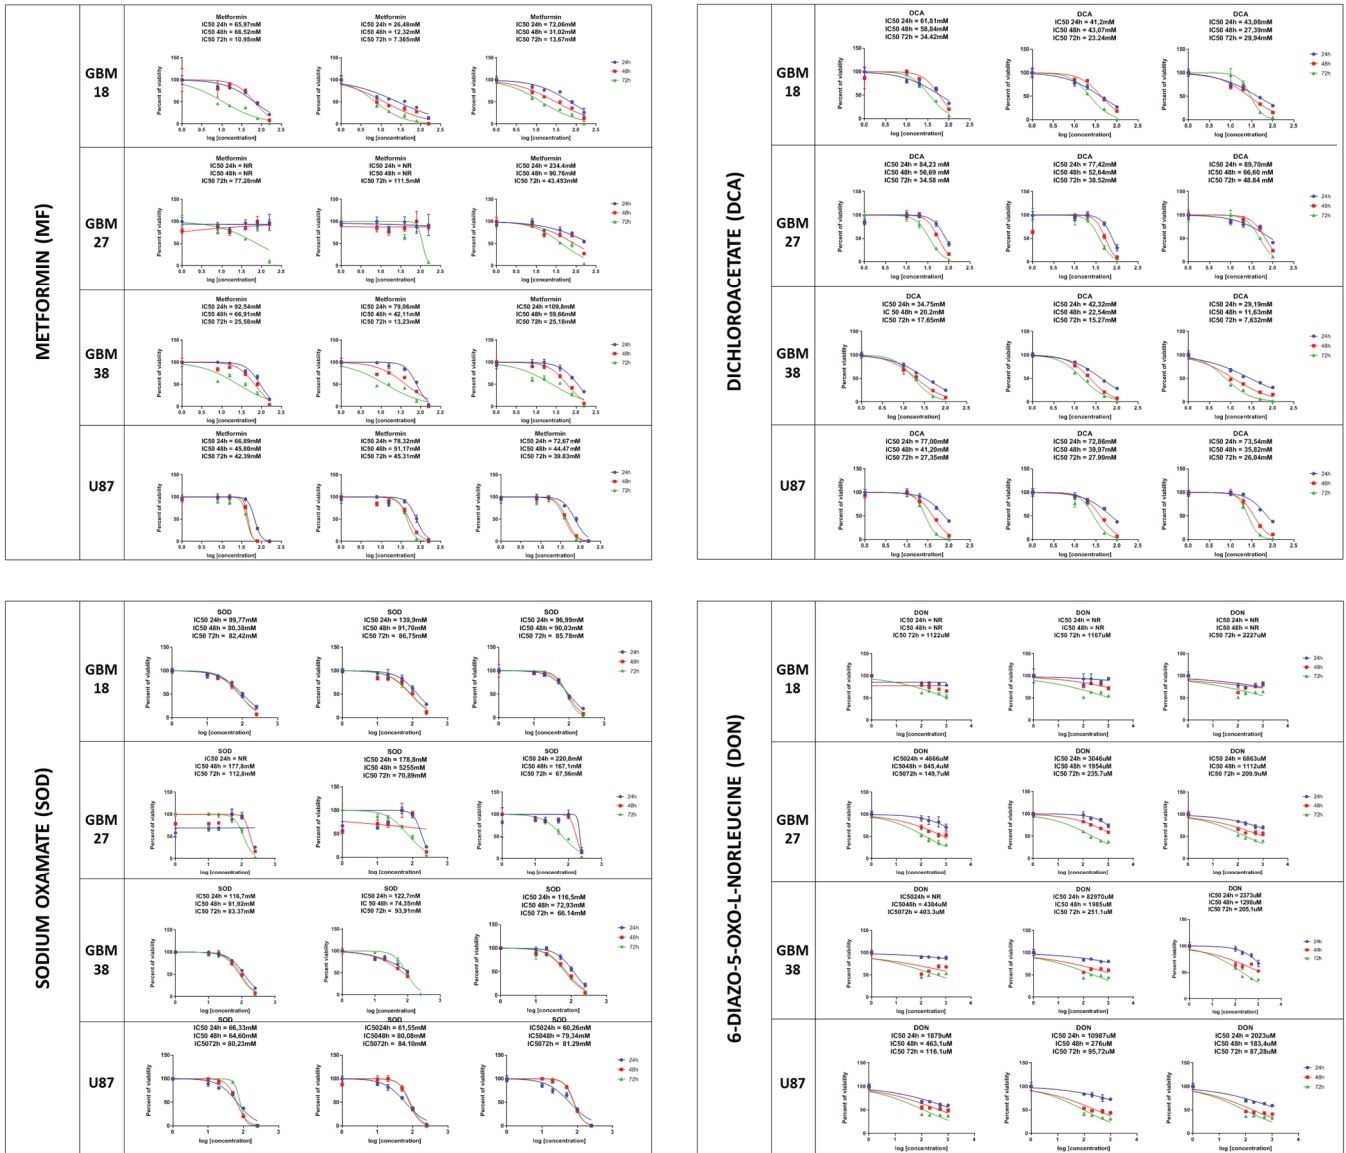

**Figure S1: Inhibitory curves for MF, DCA, SOD and DON at 24h, 48h, 72h. Calculated IC50s for each cell line and time-point are included. Abbreviations: NR (IC50 not reached, or unable to extrapolate from data using the logarithmic variable slope equation).**

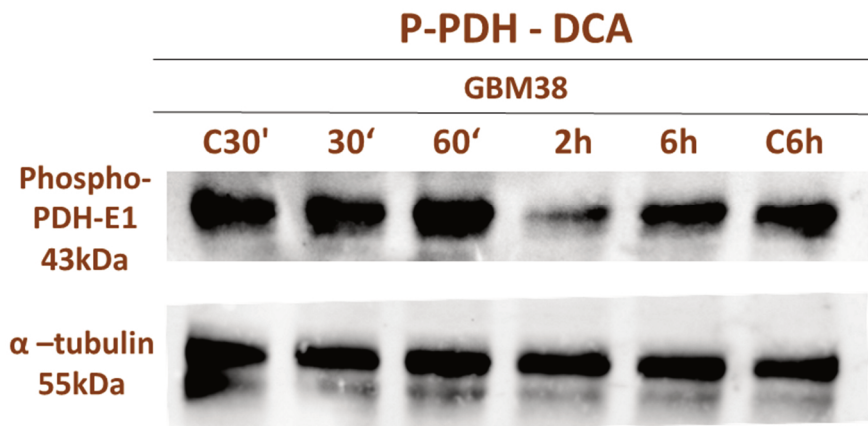

**Figure S2: Western Blot time-course analysis of phospho-Ser293 PDH-E1 in GBM38.** Protein was collected as follows: 30 min after addition of fresh culture media (C30'); 30 min, 60 min, 2 h and 6 h after addition of DCA 72h-IC50 treatment, and 6h after addition of fresh culture media (C6h).

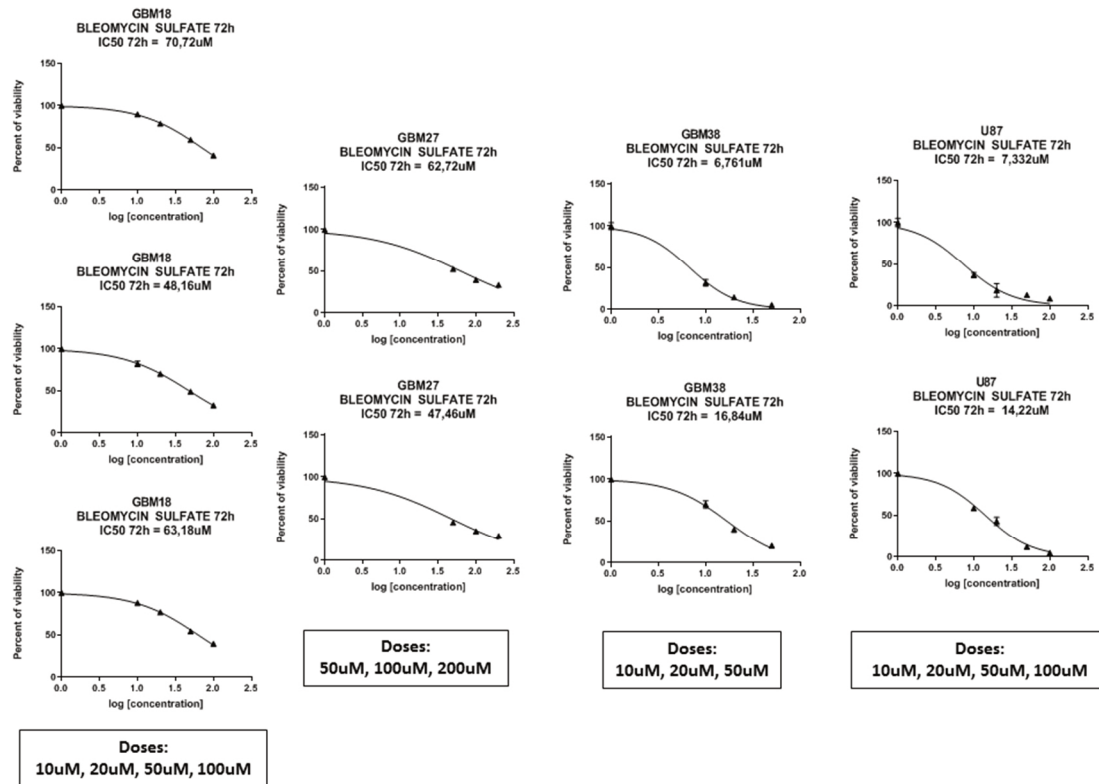

**Figure S3: Inhibitory curves for bleomycin at 72h.** Calculated IC50s for each cell line using the logarithmic variable slope equation are included. A minimum of 2 biological replicates were carried out for each cell line.

## Supplementary material: Kinetics Graphs

## Group Legend:

■ Control    ■ Experimental

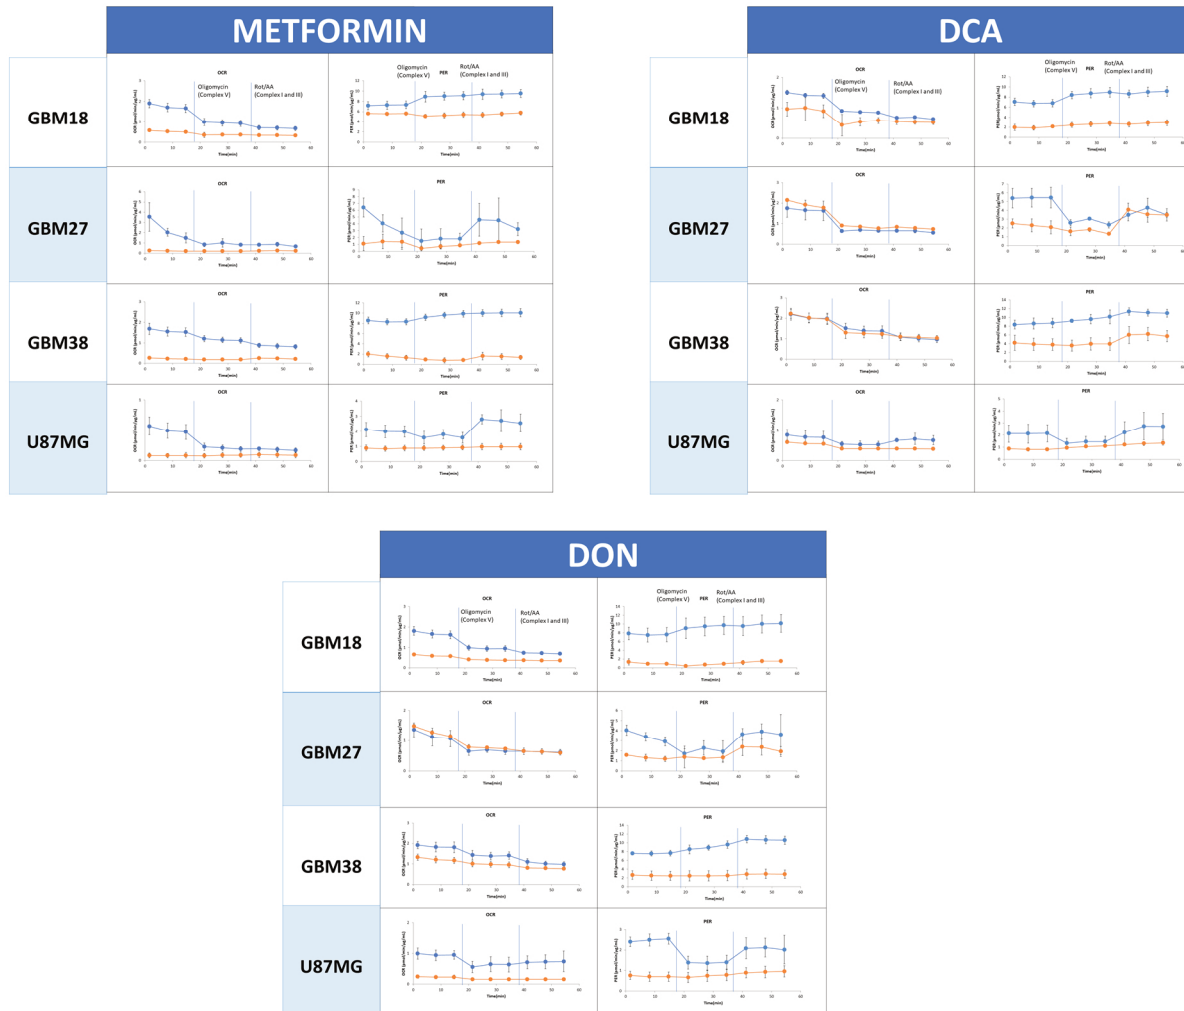

**Figure S4: Seahorse XF real-time kinetic graphs.** As MF significantly reduced basal OXPHOS in GBM18, glycolysis levels (PER) did not increase after injection of oligomycin; however, PER levels were maintained in treated cells. In GBM27, GBM38 and U87MG, there was a significant reduction of OCR and PER, and, similarly, levels did not change after injection of inhibitors. In terms of OCR changes, DCA treated and non-treated cells responded equally. GBM18, GBM38 and U87MG were not able to compensate total respiration inhibition (rotenone/antimycin A), but, interestingly, GBM27 was able to rescue inhibition by glycolysis, raising to equal levels as control cells, even though basal PER levels were initially lower. DON reduced OCR in GBM18 and U87MG, and, in these cell lines, PER was low and did not change after any injection of mitochondrial inhibitors. In GBM27 and GBM38, OCR fluctuations after inhibitors were similar in control and treated cells; surprisingly, DON did not reduce OCR in GBM27 at all (inhibition of glutaminolysis had no effect on mitochondrial ATP production rates). However, PER increased in GBM27 in both control and treated cells after rotenone/antimycin A, whereas, in GBM38, PER was globally decreased and remained unaltered even after injection of inhibitors. Kinetic profiles of OCR and ECAR also allow for the identification of resistance to ETC inhibition and residual non-mitochondrial OCR (i.e., after injection of rotenone/antimycin A, OCR does not reach zero). In our study, cells in basal conditions often maintained residual OCR, whereas MF treated cells demonstrated nearly completely abolished OCR. Abbreviations: Proton Efflux Rate (PER), Oxygen Consumption Rate (OCR).

**File S1: Comprehensive analysis of Chou-Talalay combinatory experiments, as exported from CompuSyn software.** Fraction of affected cells from each drug individually and in combination, with median-effect dose ( $D_m$ ), sigmoidicity/shape ( $m$ ) and linear correlation coefficient of the median-effect plot ( $r$ ). Additionally, we provide complete descriptions of Dose-Effect Curve, Median-Effect Plot, Combination Index Plot, Logarithmic Combination Index Plot, DRI Plot, Log(DRI) Plot, Isobologram and Polygonogram at  $F_a = 0.9$ . Reports are provided in PDF format.

...Data for Drug: MF [uM]

| <b>Dose</b> | <b>Effect</b> |
|-------------|---------------|
| 7870.0      | 0.53624       |
| 7870.0      | 0.57607       |
| 7870.0      | 0.41415       |
| 15750.0     | 0.58159       |
| 15750.0     | 0.71024       |
| 15750.0     | 0.56295       |
| 39390.0     | 0.62561       |
| 39390.0     | 0.81219       |
| 39390.0     | 0.66741       |
| 78780.0     | 0.87241       |
| 78780.0     | 0.92948       |
| 78780.0     | 0.79514       |
| 157520.     | 0.98401       |
| 157520.     | 0.99          |
| 157520.     | 0.98892       |
| 10660.0     | 0.52521       |
| 10660.0     | 0.45177       |

17 data points entered.

**X-int:** 4.04414

**Y-int:** -5.3314 +/- 0.74215

**m:** 1.31830 +/- 0.16423

**Dm:** 11069.8

**r:** 0.90065

---

Data for Drug: BL [uM]

| <b>Dose</b> | <b>Effect</b> |
|-------------|---------------|
| 60.5        | 0.5028        |
| 10.0        | 0.17796       |
| 10.0        | 0.11899       |
| 20.0        | 0.29743       |
| 20.0        | 0.23117       |
| 50.0        | 0.50862       |
| 50.0        | 0.45673       |
| 100.0       | 0.67143       |
| 100.0       | 0.60417       |
| 60.5        | 0.55855       |

10 data points entered.

**X-int:** 1.74071

**Y-int:** -1.7832 +/- 0.11170

**m:** 1.02439 +/- 0.06994

**Dm:** 55.0440

**r:** 0.98186

---

Data for Drug Combo: MF-BL (MF+BL [176.198:1])

| Dose A   | Effect  |
|----------|---------|
| 1332.50+ | 0.18353 |
| 5330.00+ | 0.50214 |
| 10660.0+ | 0.67842 |
| 10660.0+ | 0.69075 |
| 5330.00+ | 0.52958 |
| 1332.50+ | 0.18896 |

6 data points entered.

**X-int:** 3.71365**Y-int:** -4.0325 +/- 0.08700**m:** 1.08586 +/- 0.02385**Dm:** 5171.86**r:** 0.99904

Dose-Effect Curve

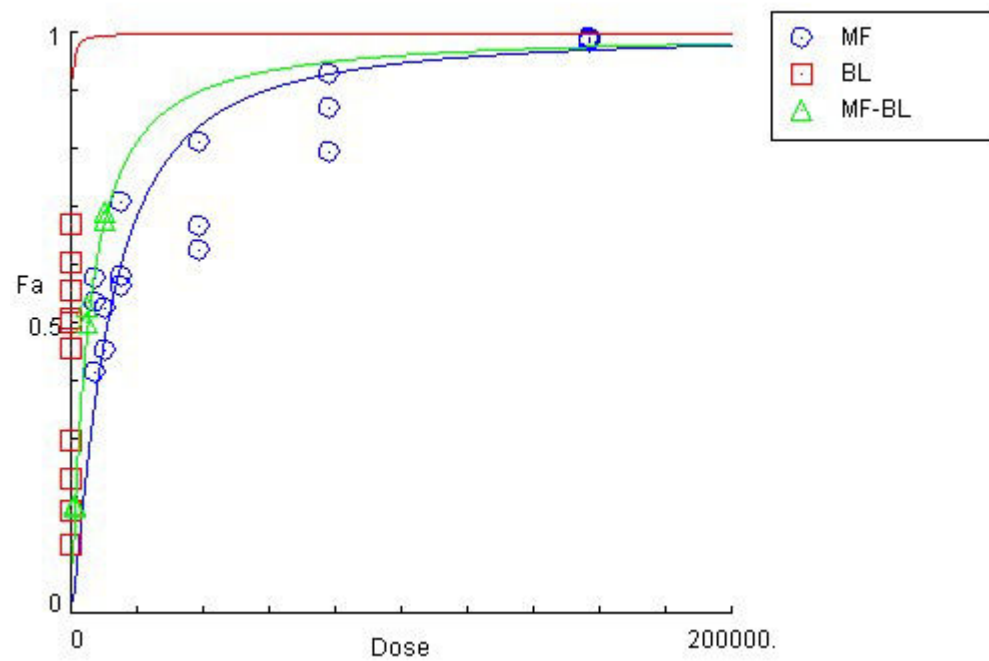

Median-Effect Plot

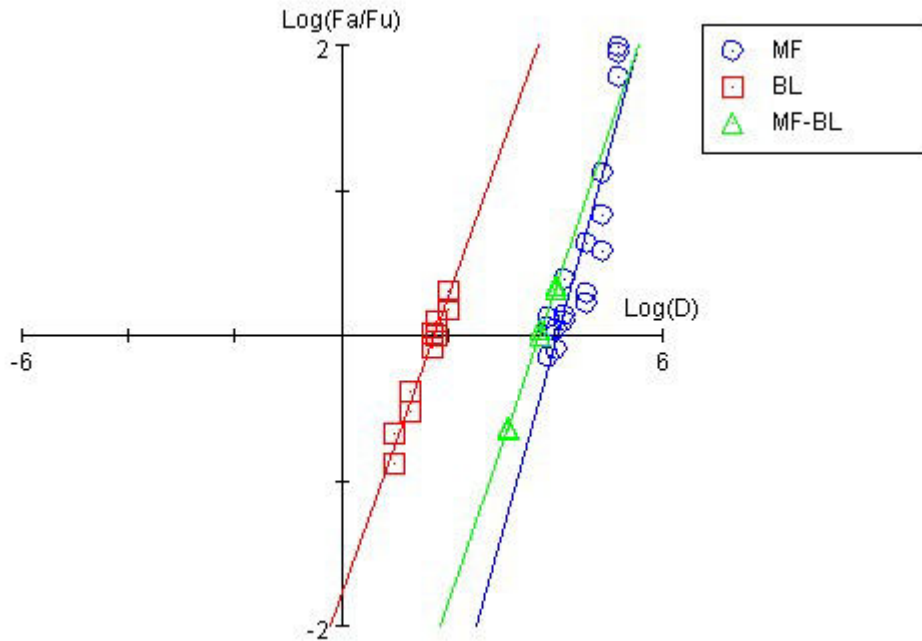

CI Data for Drug Combo: MF-BL (MF+BL [176.198:1])

| Fa   | CI Value | S.D.A. Analysis     |
|------|----------|---------------------|
| 0.05 | 0.91195  | 0.91477 +/- 0.07991 |
| 0.1  | 0.92386  | 0.92581 +/- 0.06149 |
| 0.15 | 0.93412  | 0.93560 +/- 0.05104 |
| 0.2  | 0.94339  | 0.94455 +/- 0.04371 |
| 0.25 | 0.95210  | 0.95301 +/- 0.03809 |
| 0.3  | 0.96052  | 0.96123 +/- 0.03361 |
| 0.35 | 0.96884  | 0.96938 +/- 0.03003 |
| 0.4  | 0.97723  | 0.97762 +/- 0.02726 |
| 0.45 | 0.98583  | 0.98609 +/- 0.02532 |
| 0.5  | 0.99482  | 0.99495 +/- 0.02428 |
| 0.55 | 1.00436  | 1.00438 +/- 0.02424 |
| 0.6  | 1.01468  | 1.01460 +/- 0.02527 |
| 0.65 | 1.02611  | 1.02592 +/- 0.02743 |
| 0.7  | 1.03908  | 1.03880 +/- 0.03078 |
| 0.75 | 1.05431  | 1.05393 +/- 0.03545 |
| 0.8  | 1.07300  | 1.07253 +/- 0.04181 |
| 0.85 | 1.09749  | 1.09695 +/- 0.05065 |
| 0.9  | 1.13336  | 1.13277 +/- 0.06405 |
| 0.95 | 1.19999  | 1.19946 +/- 0.08955 |
| 0.97 | 1.25451  | 1.25415 +/- 0.11081 |

CI values for actual experimental points:

| Total Dose | Fa      | CI Value |
|------------|---------|----------|
| 1340.06    | 0.18353 | 0.96333  |
| 5360.25    | 0.50214 | 1.02336  |
| 10720.5    | 0.67842 | 1.07696  |
| 10720.5    | 0.69075 | 1.02503  |



| Total Dose | Fa      | CI Value |
|------------|---------|----------|
| 5360.25    | 0.52958 | 0.92968  |
| 1340.06    | 0.18896 | 0.93302  |

Combination Index Plot

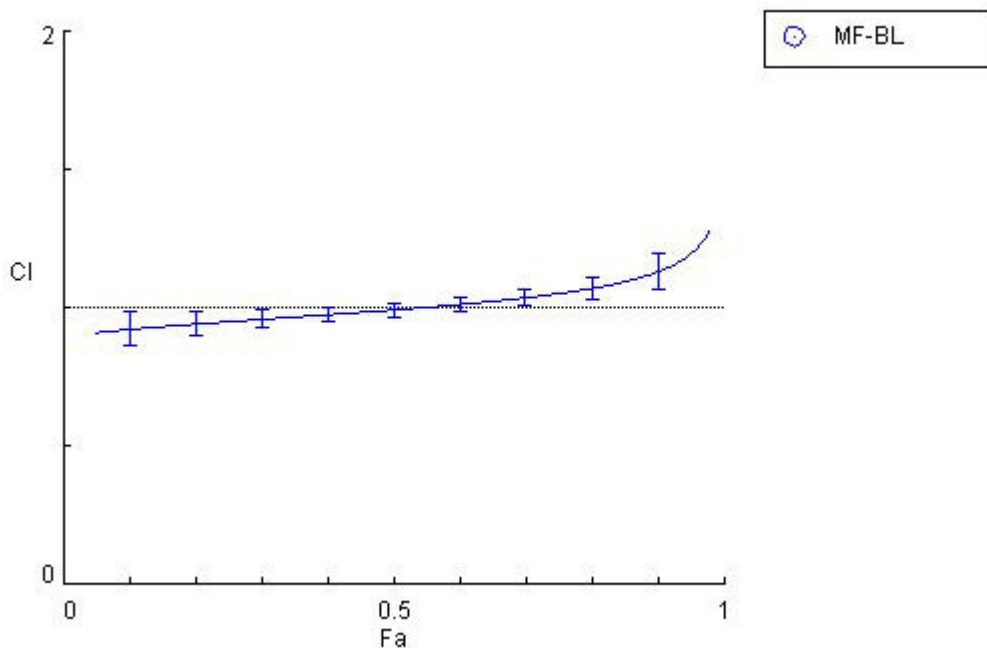

Logarithmic Combination Index Plot

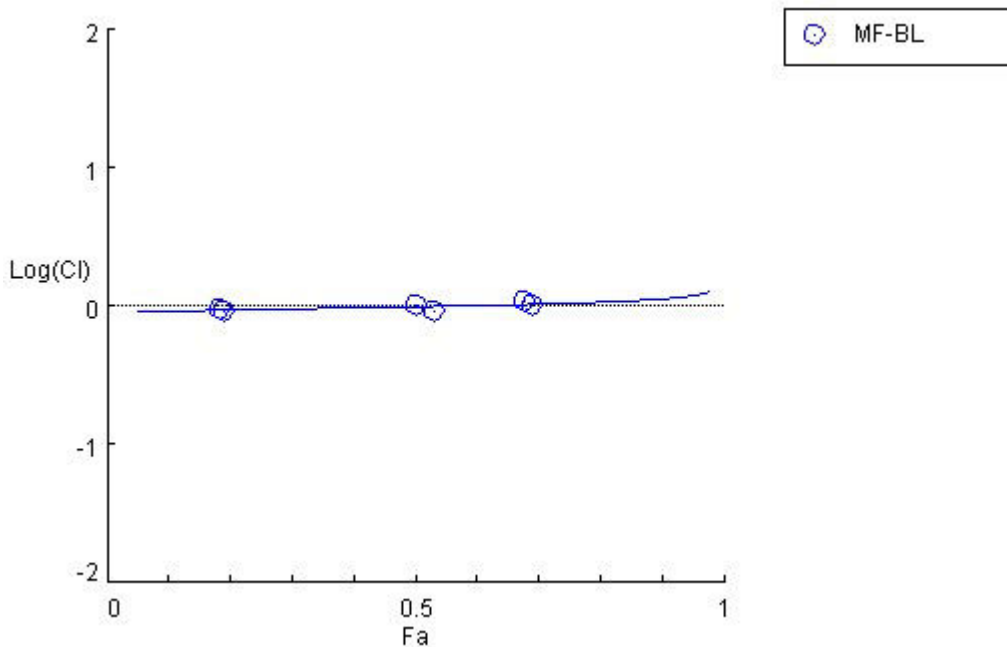

DRI Data for Drug Combo: MF-BL (MF+BL [176.198:1])

| Fa   | Dose MF | Dose BL | DRI MF  | DRI BL  |
|------|---------|---------|---------|---------|
| 0.05 | 1186.15 | 3.10740 | 3.47214 | 1.60271 |
| 0.1  | 2090.73 | 6.44441 | 3.07540 | 1.67028 |
| 0.15 | 2969.63 | 10.1231 | 2.85284 | 1.71353 |
| 0.2  | 3867.64 | 14.2227 | 2.69596 | 1.74683 |

| Fa   | Dose MF | Dose BL | DRI MF  | DRI BL  |
|------|---------|---------|---------|---------|
| 0.25 | 4810.82 | 18.8342 | 2.57292 | 1.77482 |
| 0.3  | 5821.17 | 24.0709 | 2.47004 | 1.79964 |
| 0.35 | 6921.60 | 30.0791 | 2.38016 | 1.82249 |
| 0.4  | 8138.89 | 37.0519 | 2.29903 | 1.84413 |
| 0.45 | 9506.74 | 45.2516 | 2.22383 | 1.86512 |
| 0.5  | 11069.8 | 55.0440 | 2.15254 | 1.88591 |
| 0.55 | 12889.8 | 66.9553 | 2.08352 | 1.90694 |
| 0.6  | 15056.1 | 81.7728 | 2.01538 | 1.92865 |
| 0.65 | 17704.0 | 100.729 | 1.94668 | 1.95155 |
| 0.7  | 21050.8 | 125.871 | 1.87585 | 1.97632 |
| 0.75 | 25471.8 | 160.869 | 1.80084 | 2.00396 |
| 0.8  | 31683.4 | 213.028 | 1.71865 | 2.03607 |
| 0.85 | 41264.5 | 299.298 | 1.62414 | 2.07564 |
| 0.9  | 58611.1 | 470.149 | 1.50660 | 2.12939 |
| 0.95 | 103309. | 975.039 | 1.33445 | 2.21916 |
| 0.97 | 154627. | 1638.41 | 1.22408 | 2.28532 |

DRI values calculated at experimental points

| Fa      | Dose MF | Dose BL | DRI MF  | DRI BL  |
|---------|---------|---------|---------|---------|
| 0.18353 | 3567.97 | 12.8206 | 2.67766 | 1.69528 |
| 0.50214 | 11141.9 | 55.5059 | 2.09041 | 1.83490 |
| 0.67842 | 19501.5 | 114.078 | 1.82941 | 1.88558 |
| 0.69075 | 20364.9 | 120.618 | 1.91040 | 1.99369 |
| 0.52958 | 12110.4 | 61.7906 | 2.27211 | 2.04266 |
| 0.18896 | 3666.35 | 13.2773 | 2.75149 | 1.75567 |

DRI Plot for Combo: MF-BL (MF+BL [176.198:1])

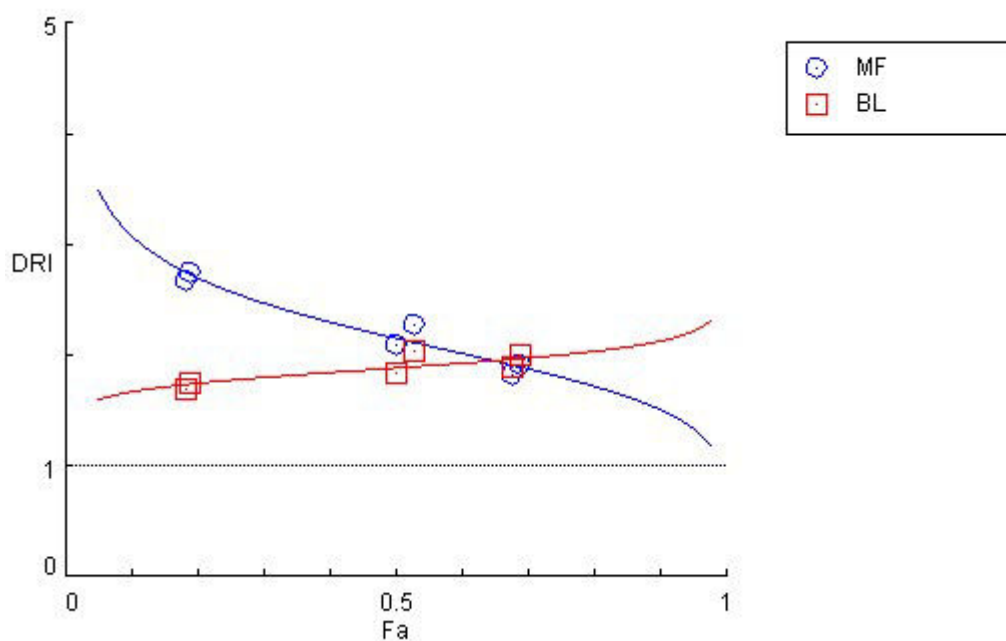

Log(DRI) Plot for Combo: MF-BL (MF+BL [176.198:1])

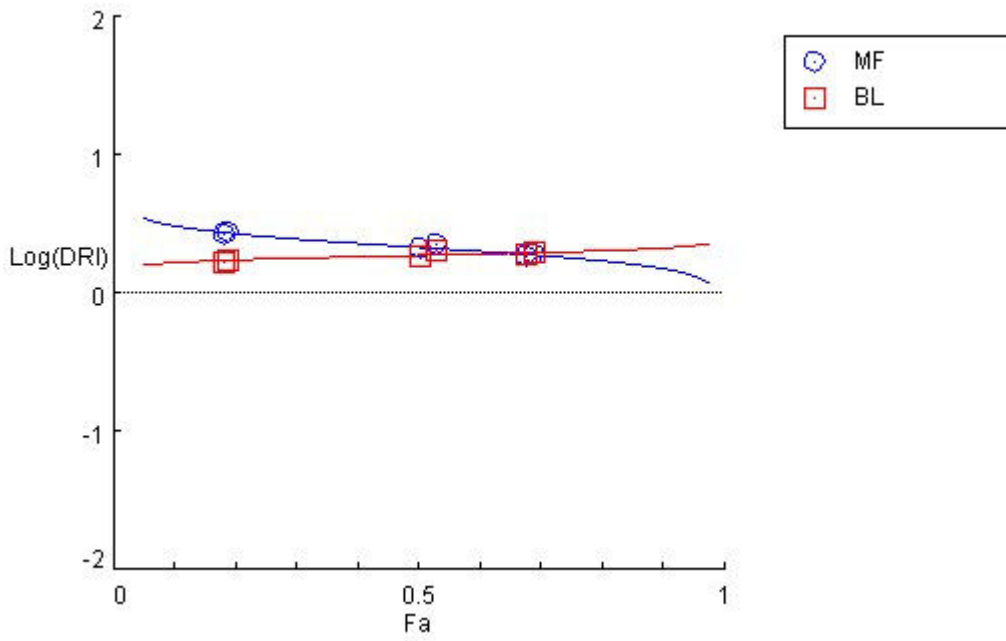

Isobologram for Combo: MF-BL (MF+BL [176.198:1])

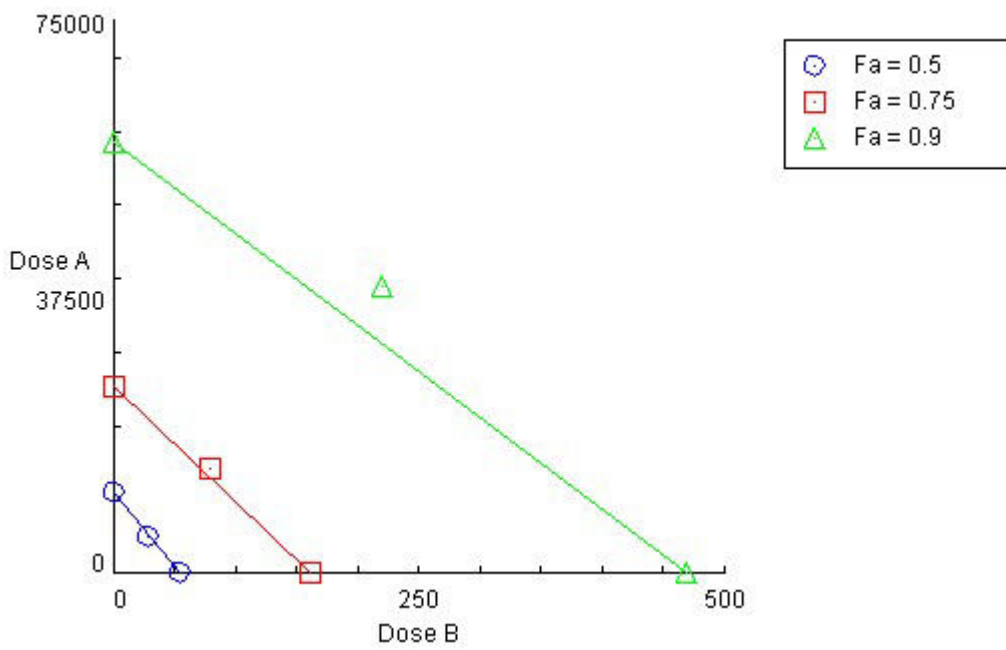

Polygonogram at Fa = 0.9

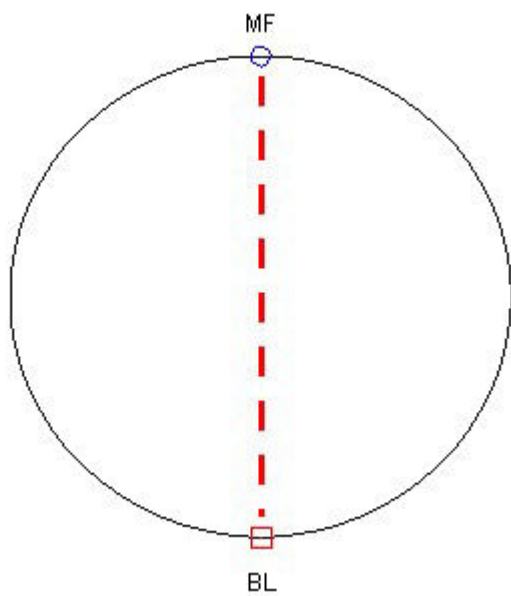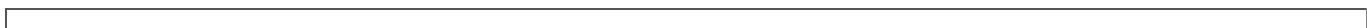

...Data for Drug: MF [uM]

| <b>Dose</b> | <b>Effect</b> |
|-------------|---------------|
| 7870.0      | 0.23281       |
| 7870.0      | 0.14046       |
| 7870.0      | 0.10309       |
| 15750.0     | 0.25291       |
| 15750.0     | 0.17587       |
| 15750.0     | 0.30018       |
| 39390.0     | 0.39243       |
| 39390.0     | 0.35269       |
| 39390.0     | 0.48068       |
| 78780.0     | 0.16058       |
| 78780.0     | 0.07686       |
| 78780.0     | 0.51773       |
| 157520.     | 0.90852       |
| 157520.     | 0.91911       |
| 157520.     | 0.95778       |
| 77411.0     | 0.43052       |
| 77411.0     | 0.39409       |

17 data points entered.

**X-int:** 4.76061

**Y-int:** -4.9332 +/- 1.30053

**m:** 1.03625 +/- 0.28164

**Dm:** 57624.7

**r:** 0.68875

Data for Drug: BL [uM]

| <b>Dose</b> | <b>Effect</b> |
|-------------|---------------|
| 50.0        | 0.47634       |
| 50.0        | 0.54304       |
| 100.0       | 0.60608       |
| 100.0       | 0.64751       |
| 200.0       | 0.66695       |
| 200.0       | 0.70512       |
| 55.09       | 0.61750       |
| 55.09       | 0.60433       |

8 data points entered.

**X-int:** 1.47042

**Y-int:** -0.6157 +/- 0.23160

**m:** 0.41874 +/- 0.11876

**Dm:** 29.5408

**r:** 0.82127

Data for Drug Combo: MF-BL (MF+BL [1404.97:1])

| <b>Dose A</b> | <b>Effect</b> |
|---------------|---------------|
|---------------|---------------|

| Dose A   | Effect  |
|----------|---------|
| 77411.0+ | 0.73208 |
| 38705.5+ | 0.69087 |
| 9676.37+ | 0.24292 |
| 77411.0+ | 0.79116 |
| 38705.5+ | 0.63240 |
| 9676.37+ | 0.22696 |

6 data points entered.

**X-int:** 4.40525

**Y-int:** -5.1086 +/- 0.47342

**m:** 1.15966 +/- 0.10512

**Dm:** 25424.3

**r:** 0.98396

Dose-Effect Curve

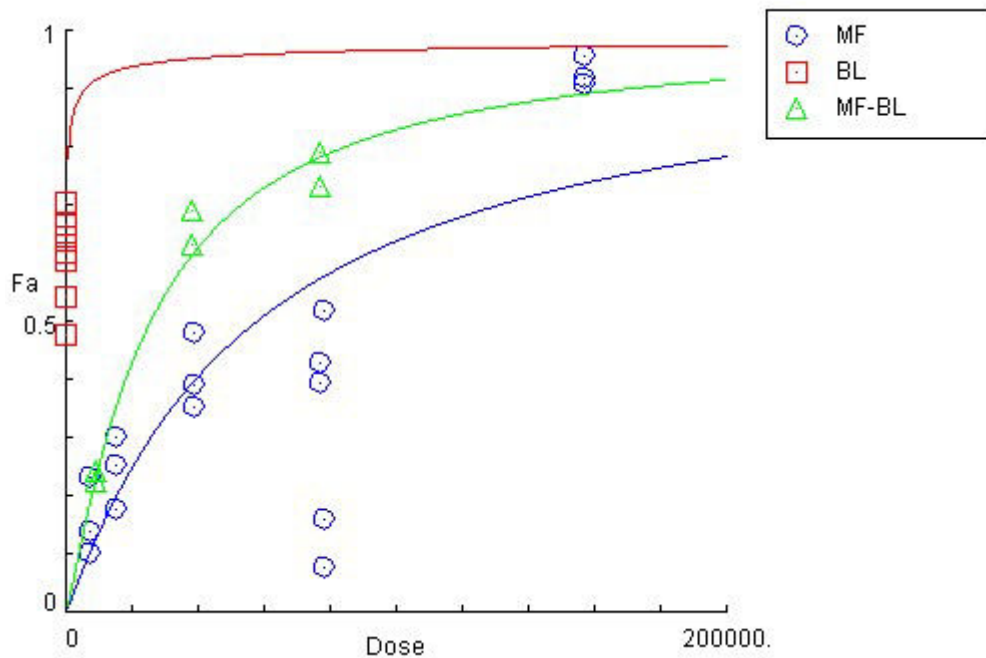

Median-Effect Plot

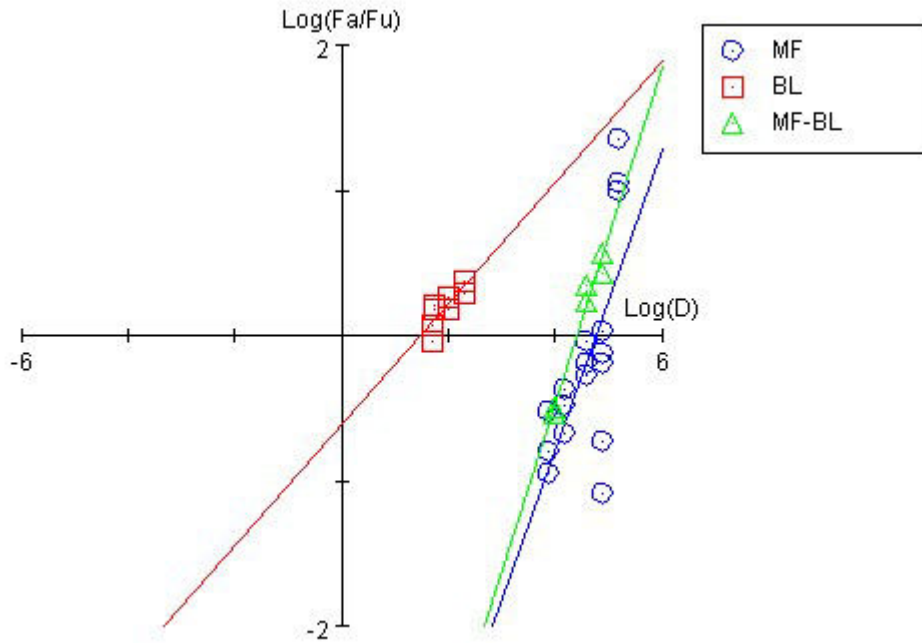

CI Data for Drug Combo: MF-BL (MF+BL [1404.97:1])

| Fa   | CI Value | S.D.A. Analysis     |
|------|----------|---------------------|
| 0.05 | 55.2970  | 72.4175 +/- 199.367 |
| 0.1  | 18.0448  | 20.9963 +/- 36.4717 |
| 0.15 | 9.16239  | 10.1143 +/- 12.4923 |
| 0.2  | 5.58389  | 5.97620 +/- 5.48397 |
| 0.25 | 3.76582  | 3.94837 +/- 2.73350 |
| 0.3  | 2.71103  | 2.80136 +/- 1.46224 |
| 0.35 | 2.04403  | 2.08976 +/- 0.81237 |
| 0.4  | 1.59604  | 1.61894 +/- 0.45859 |
| 0.45 | 1.28150  | 1.29237 +/- 0.25991 |
| 0.5  | 1.05303  | 1.05755 +/- 0.15023 |
| 0.55 | 0.88259  | 0.88386 +/- 0.09773 |
| 0.6  | 0.75265  | 0.75242 +/- 0.08254 |
| 0.65 | 0.65177  | 0.65102 +/- 0.08448 |
| 0.7  | 0.57218  | 0.57147 +/- 0.09066 |
| 0.75 | 0.50836  | 0.50802 +/- 0.09716 |
| 0.8  | 0.45621  | 0.45642 +/- 0.10361 |
| 0.85 | 0.41234  | 0.41325 +/- 0.11059 |
| 0.9  | 0.37325  | 0.37508 +/- 0.11905 |
| 0.95 | 0.33269  | 0.33600 +/- 0.13097 |
| 0.97 | 0.31157  | 0.31599 +/- 0.13813 |

CI values for actual experimental points:

| Total Dose | Fa      | CI Value |
|------------|---------|----------|
| 77466.1    | 0.73208 | 0.67833  |
| 38733.0    | 0.69087 | 0.44577  |
| 9683.26    | 0.24292 | 4.02328  |
| 77466.1    | 0.79116 | 0.44900  |

| Total Dose | Fa      | CI Value |
|------------|---------|----------|
| 38733.0    | 0.63240 | 0.65317  |
| 9683.26    | 0.22696 | 4.90037  |

Combination Index Plot

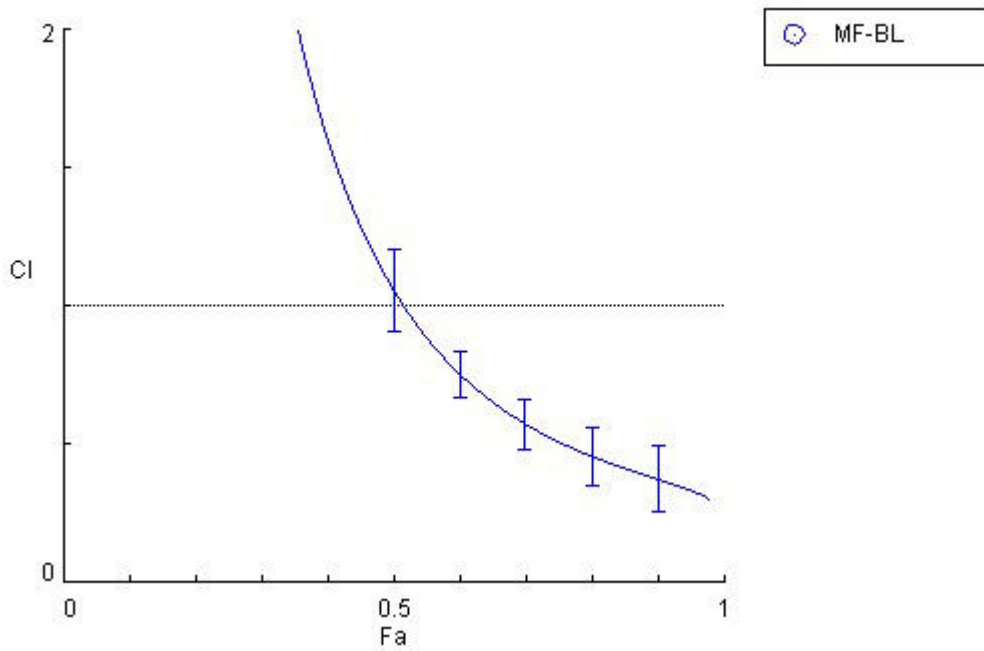

Logarithmic Combination Index Plot

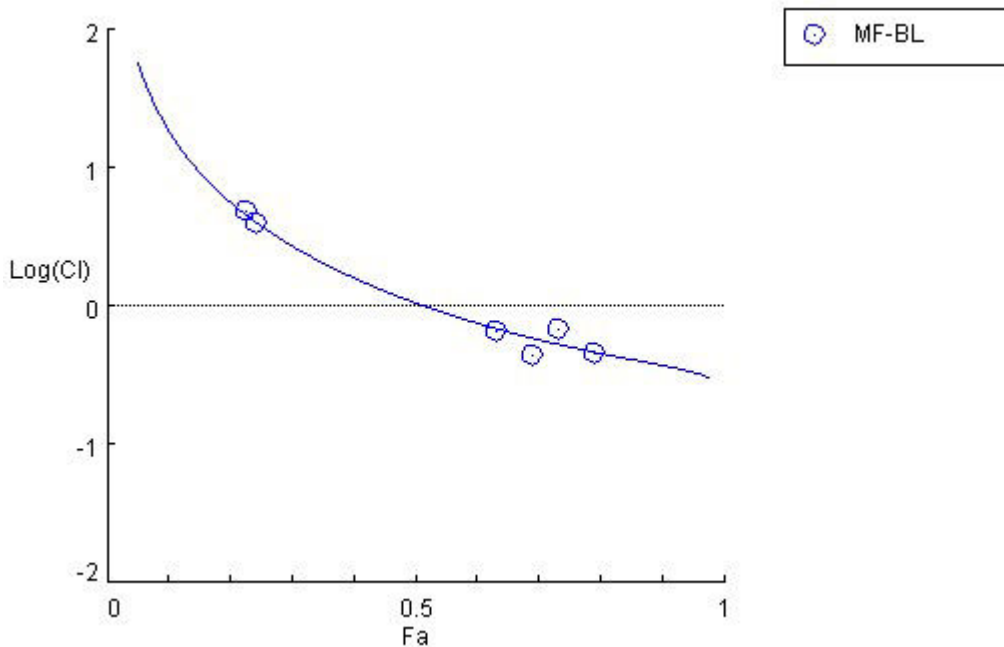

DRI Data for Drug Combo: MF-BL (MF+BL [1404.97:1])

| Fa   | Dose MF | Dose BL | DRI MF  | DRI BL  |
|------|---------|---------|---------|---------|
| 0.05 | 3361.91 | 0.02610 | 1.67626 | 0.01828 |
| 0.1  | 6914.26 | 0.15544 | 1.80996 | 0.05717 |
| 0.15 | 10805.2 | 0.46922 | 1.89803 | 0.11580 |
| 0.2  | 15122.0 | 1.07801 | 1.96715 | 0.19702 |



| Fa   | Dose MF | Dose BL | DRI MF  | DRI BL  |
|------|---------|---------|---------|---------|
| 0.25 | 19960.8 | 2.14286 | 2.02613 | 0.30560 |
| 0.3  | 25439.2 | 3.90521 | 2.07911 | 0.44842 |
| 0.35 | 31707.9 | 6.73572 | 2.12842 | 0.63525 |
| 0.4  | 38965.2 | 11.2174 | 2.17562 | 0.87997 |
| 0.45 | 47479.6 | 18.2935 | 2.22187 | 1.20275 |
| 0.5  | 57624.7 | 29.5408 | 2.26813 | 1.63361 |
| 0.55 | 69937.5 | 47.7034 | 2.31536 | 2.21883 |
| 0.6  | 85219.8 | 77.7951 | 2.36457 | 3.03272 |
| 0.65 | 104725. | 129.557 | 2.41701 | 4.20104 |
| 0.7  | 130531. | 223.461 | 2.47434 | 5.95132 |
| 0.75 | 166357. | 407.242 | 2.53903 | 8.73268 |
| 0.8  | 219588. | 809.512 | 2.61517 | 13.5451 |
| 0.85 | 307316. | 1859.82 | 2.71040 | 23.0456 |
| 0.9  | 480255. | 5614.13 | 2.84229 | 46.6816 |
| 0.95 | 987714. | 33439.4 | 3.06899 | 145.979 |
| 0.97 | 1649876 | 119034. | 3.24121 | 328.545 |

DRI values calculated at experimental points

| Fa      | Dose MF | Dose BL | DRI MF  | DRI BL  |
|---------|---------|---------|---------|---------|
| 0.73208 | 152017. | 325.816 | 1.96376 | 5.91339 |
| 0.69087 | 125212. | 201.600 | 3.23500 | 7.31789 |
| 0.24292 | 19239.9 | 1.95641 | 1.98834 | 0.28406 |
| 0.79116 | 208369. | 710.984 | 2.69172 | 12.9040 |
| 0.63240 | 97271.8 | 107.923 | 2.51313 | 3.91752 |
| 0.22696 | 17659.1 | 1.58240 | 1.82497 | 0.22976 |

DRI Plot for Combo: MF-BL (MF+BL [1404.97:1])

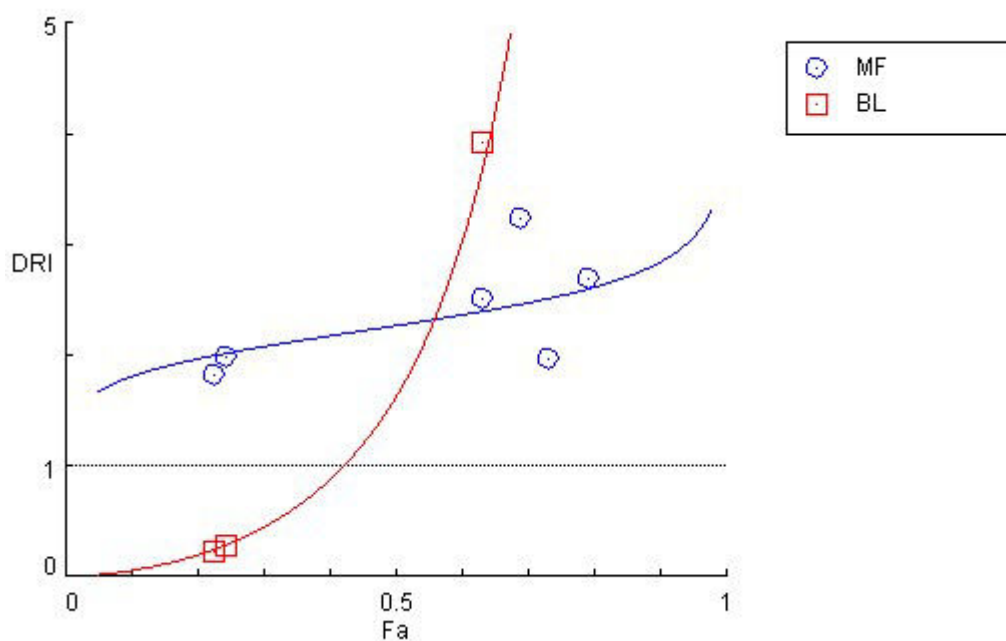

Log(DRI) Plot for Combo: MF-BL (MF+BL [1404.97:1])

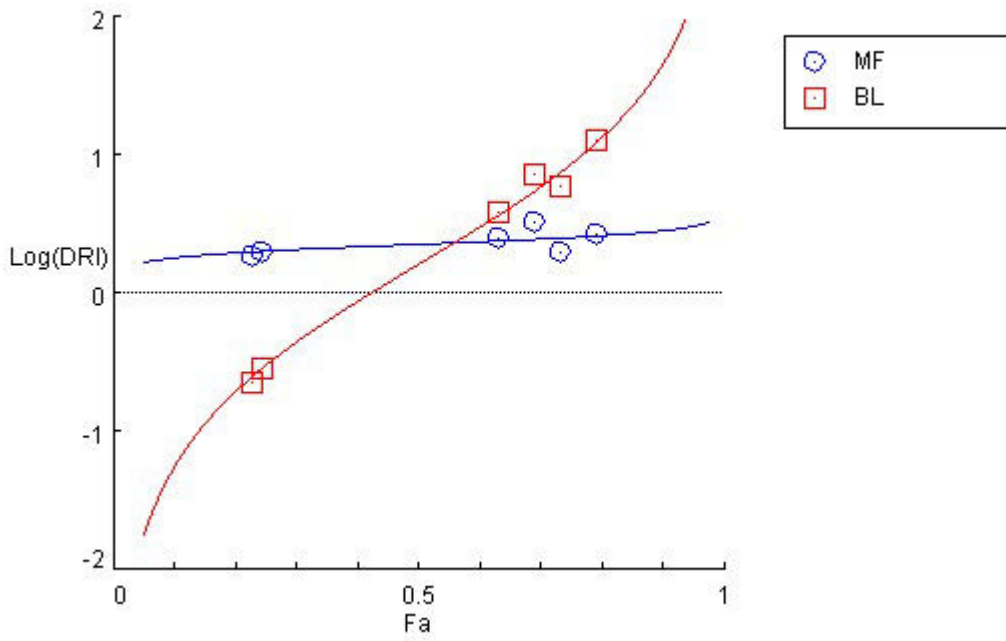

Isobologram for Combo: MF-BL (MF+BL [1404.97:1])

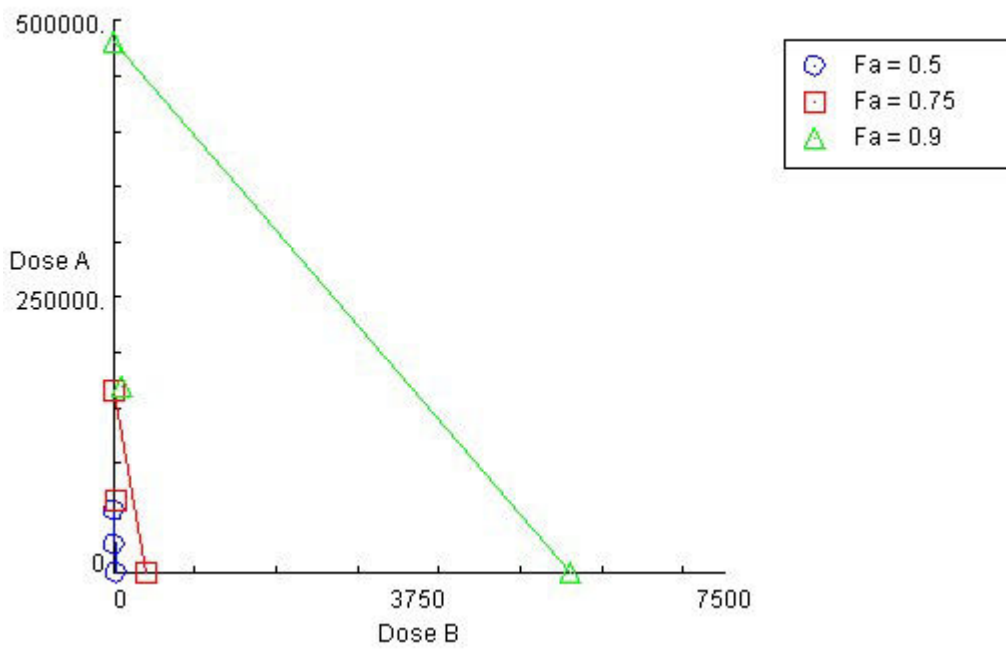

Polygonogram at Fa = 0.9

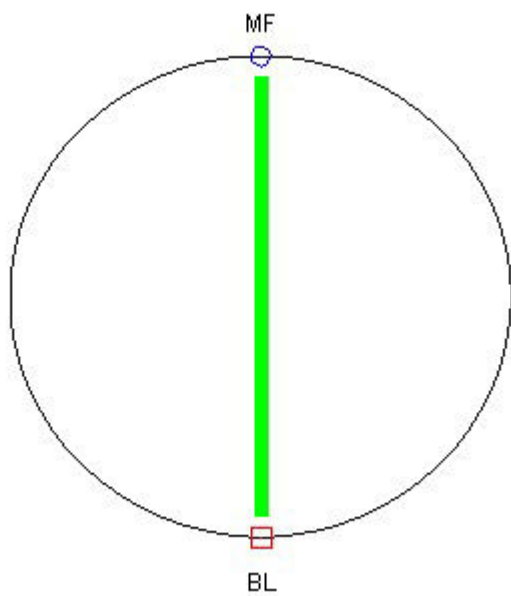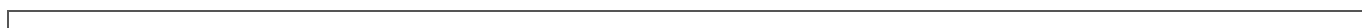

...Data for Drug: MF [uM]

| <b>Dose</b> | <b>Effect</b> |
|-------------|---------------|
| 7870.0      | 0.42573       |
| 7870.0      | 0.52827       |
| 7870.0      | 0.38937       |
| 15750.0     | 0.29622       |
| 15750.0     | 0.49188       |
| 15750.0     | 0.35812       |
| 39390.0     | 0.49697       |
| 39390.0     | 0.57784       |
| 39390.0     | 0.46921       |
| 78780.0     | 0.70248       |
| 78780.0     | 0.87161       |
| 78780.0     | 0.72910       |
| 157520.     | 0.999         |
| 157520.     | 0.99754       |
| 157520.     | 0.98194       |
| 21330.0     | 0.44783       |
| 21330.0     | 0.63190       |

17 data points entered.

**X-int:** 4.24993

**Y-int:** -7.3975 +/- 1.55867

**m:** 1.74061 +/- 0.34245

**Dm:** 17779.8

**r:** 0.79541

---

Data for Drug: BL [uM]

| <b>Dose</b> | <b>Effect</b> |
|-------------|---------------|
| 50.0        | 0.68241       |
| 50.0        | 0.29706       |
| 100.0       | 0.85466       |
| 100.0       | 0.59909       |
| 200.0       | 0.94684       |
| 200.0       | 0.79812       |
| 11.8        | 0.69459       |
| 11.8        | 0.76364       |

8 data points entered.

**X-int:** 0.52962

**Y-int:** -0.1933 +/- 0.66703

**m:** 0.36498 +/- 0.36539

**Dm:** 3.38545

**r:** 0.37760

---

Data for Drug Combo: MF-BL (MF+BL [1807.62:1])

| <b>Dose A</b> | <b>Effect</b> |
|---------------|---------------|
|---------------|---------------|

| Dose A   | Effect  |
|----------|---------|
| 21330.0+ | 0.61629 |
| 10665.0+ | 0.55014 |
| 2666.25+ | 0.48829 |
| 21330.0+ | 0.81932 |
| 10665.0+ | 0.68451 |
| 2666.25+ | 0.55647 |

6 data points entered.

**X-int:** 3.37748

**Y-int:** -1.3953 +/- 0.83013

**m:** 0.41313 +/- 0.21039

**Dm:** 2384.95

**r:** 0.70060

Dose-Effect Curve

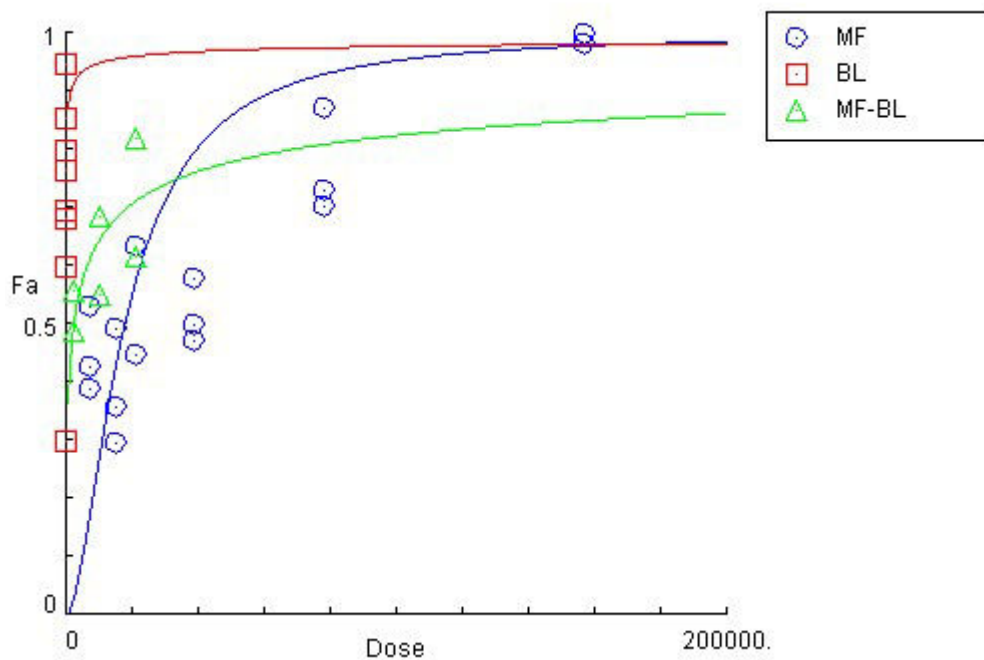

Median-Effect Plot

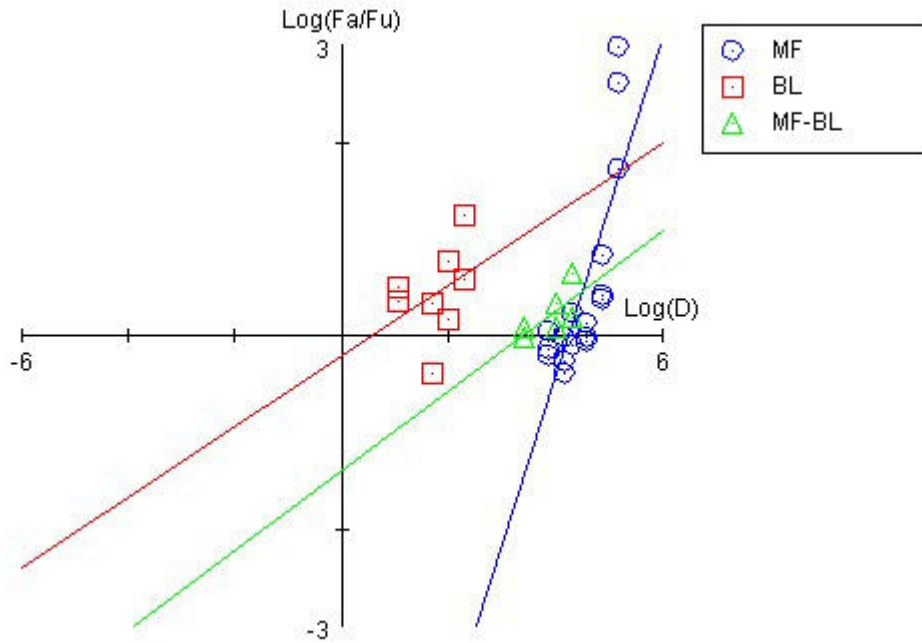

CI Data for Drug Combo: MF-BL (MF+BL [1807.62:1])

| Fa   | CI Value | S.D.A. Analysis     |
|------|----------|---------------------|
| 0.05 | 0.99797  | 1.35E12 +/- 1.54E13 |
| 0.1  | 0.78798  | 1.726E9 +/- 1.97E10 |
| 0.15 | 0.68322  | 2.789E7 +/- 3.187E8 |
| 0.2  | 0.61679  | 1248703 +/- 1.427E7 |
| 0.25 | 0.57083  | 96011.3 +/- 1097274 |
| 0.3  | 0.53859  | 10210.6 +/- 116687. |
| 0.35 | 0.51740  | 1334.12 +/- 15241   |
| 0.4  | 0.50677  | 199.068 +/- 2269.11 |
| 0.45 | 0.50785  | 32.4770 +/- 365.246 |
| 0.5  | 0.52357  | 5.86109 +/- 60.9043 |
| 0.55 | 0.55951  | 1.45038 +/- 10.0737 |
| 0.6  | 0.62559  | 0.77514 +/- 1.54372 |
| 0.65 | 0.73999  | 0.78587 +/- 0.44716 |
| 0.7  | 0.93781  | 1.01305 +/- 1.00953 |
| 0.75 | 1.29307  | 1.50231 +/- 2.66111 |
| 0.8  | 1.98294  | 2.65178 +/- 8.11193 |
| 0.85 | 3.51983  | 6.21459 +/- 31.7206 |
| 0.9  | 7.93559  | 25.0526 +/- 197.844 |
| 0.95 | 30.9088  | 370.205 +/- 3885.51 |
| 0.97 | 82.1983  | 2923.55 +/- 32488.4 |

CI values for actual experimental points:

| Total Dose | Fa      | CI Value |
|------------|---------|----------|
| 21341.8    | 0.61629 | 1.86538  |
| 10670.9    | 0.55014 | 1.53851  |
| 2667.73    | 0.48829 | 0.64941  |
| 21341.8    | 0.81932 | 0.55875  |

| Total Dose | Fa      | CI Value |
|------------|---------|----------|
| 10670.9    | 0.68451 | 0.59312  |
| 2667.73    | 0.55647 | 0.36566  |

Combination Index Plot

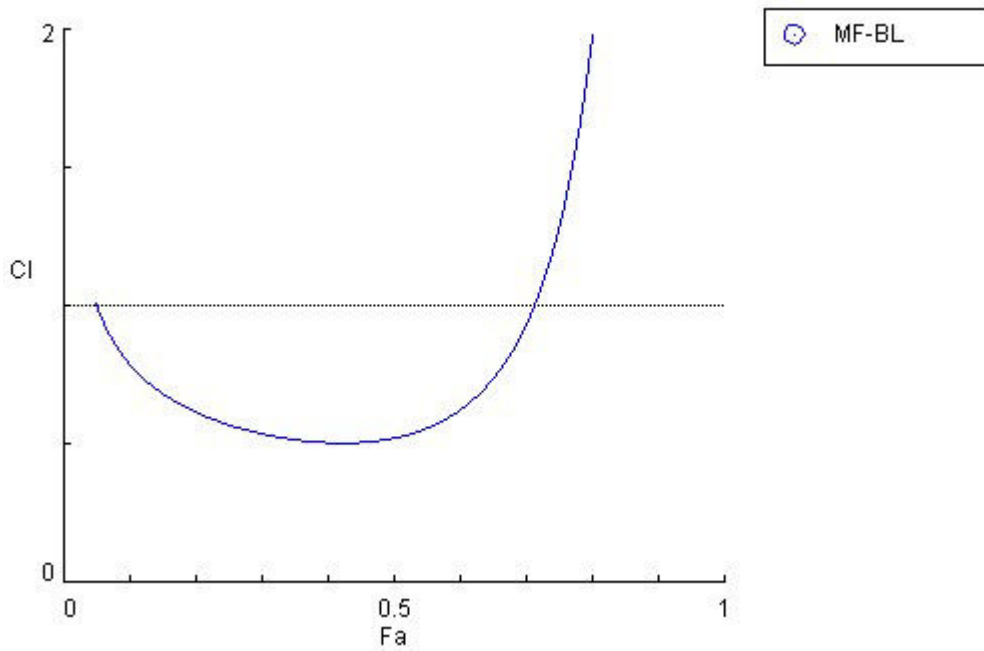

Logarithmic Combination Index Plot

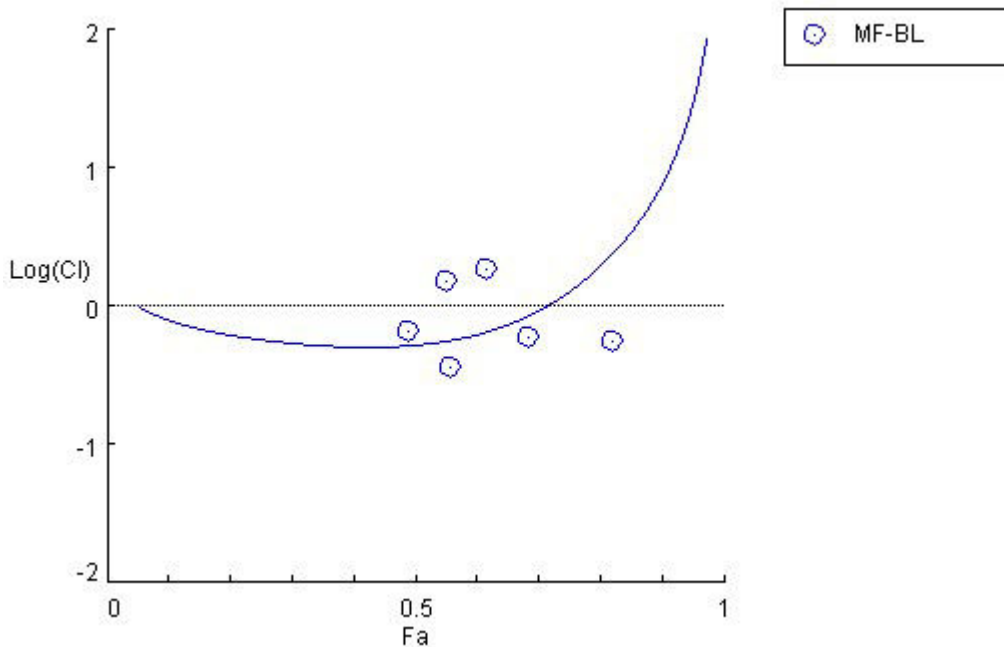

DRI Data for Drug Combo: MF-BL (MF+BL [1807.62:1])

| Fa   | Dose MF | Dose BL | DRI MF  | DRI BL  |
|------|---------|---------|---------|---------|
| 0.05 | 3275.42 | 0.00106 | 1711.25 | 1.00262 |
| 0.1  | 5031.56 | 0.00822 | 430.778 | 1.27281 |
| 0.15 | 6563.43 | 0.02921 | 183.382 | 1.47544 |
| 0.2  | 8017.44 | 0.07587 | 96.4077 | 1.64903 |

| Fa   | Dose MF | Dose BL | DRI MF  | DRI BL  |
|------|---------|---------|---------|---------|
| 0.25 | 9458.33 | 0.16686 | 56.6853 | 1.80769 |
| 0.3  | 10927.5 | 0.33220 | 35.6439 | 1.95874 |
| 0.35 | 12458.7 | 0.62089 | 23.3876 | 2.10685 |
| 0.4  | 14085.1 | 1.11467 | 15.7673 | 2.25555 |
| 0.45 | 15843.7 | 1.95360 | 10.8036 | 2.40799 |
| 0.5  | 17779.8 | 3.38545 | 7.45910 | 2.56735 |
| 0.55 | 19952.4 | 5.86675 | 5.14996 | 2.73725 |
| 0.6  | 22443.6 | 10.2822 | 3.52871 | 2.92224 |
| 0.65 | 25373.5 | 18.4595 | 2.37897 | 3.12849 |
| 0.7  | 28929.0 | 34.5008 | 1.56095 | 3.36505 |
| 0.75 | 33422.4 | 68.6866 | 0.98153 | 3.64623 |
| 0.8  | 39429.1 | 151.074 | 0.57711 | 3.99706 |
| 0.85 | 48163.9 | 392.324 | 0.30340 | 4.46731 |
| 0.9  | 62827.5 | 1393.56 | 0.12916 | 5.17850 |
| 0.95 | 96512.8 | 10795.6 | 0.03251 | 6.57402 |
| 0.97 | 130990. | 46331.7 | 0.01218 | 7.79047 |

DRI values calculated at experimental points

| Fa      | Dose MF | Dose BL | DRI MF  | DRI BL  |
|---------|---------|---------|---------|---------|
| 0.61629 | 23342.6 | 12.4002 | 1.09436 | 1.05086 |
| 0.55014 | 19958.7 | 5.87559 | 1.87142 | 0.99586 |
| 0.48829 | 17307.7 | 2.97766 | 6.49137 | 2.01874 |
| 0.81932 | 42375.5 | 213.035 | 1.98666 | 18.0538 |
| 0.68451 | 27745.0 | 28.2670 | 2.60150 | 4.79100 |
| 0.55647 | 20254.6 | 6.30281 | 7.59665 | 4.27306 |

DRI Plot for Combo: MF-BL (MF+BL [1807.62:1])

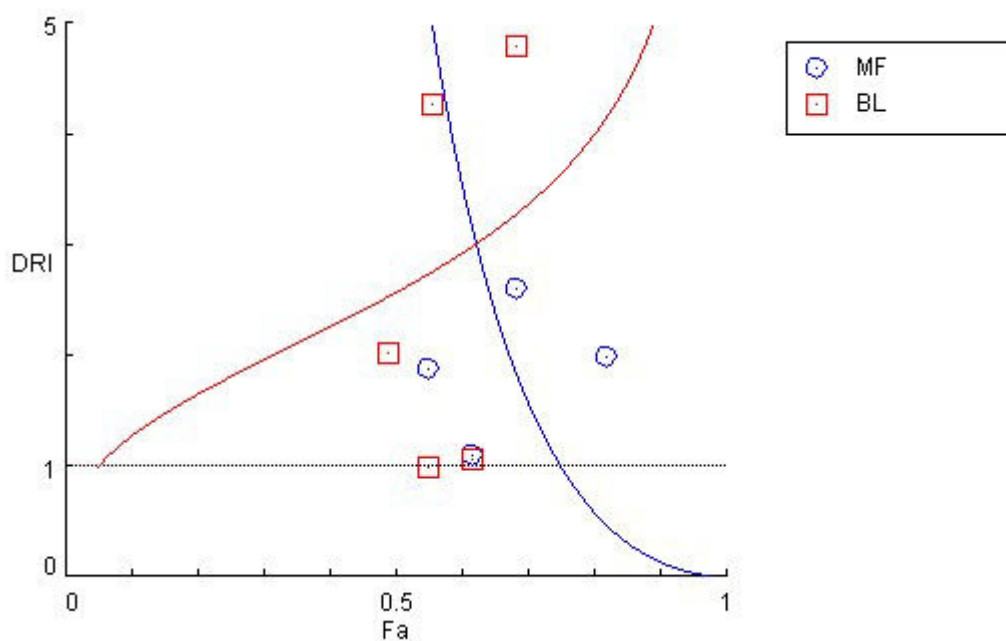

Log(DRI) Plot for Combo: MF-BL (MF+BL [1807.62:1])



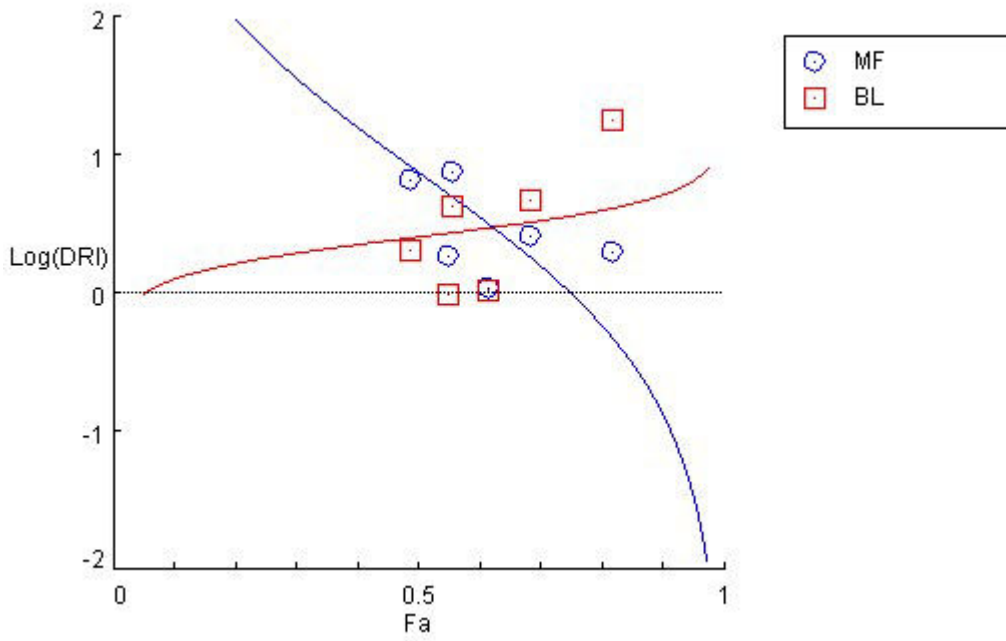

Isobologram for Combo: MF-BL (MF+BL [1807.62:1])

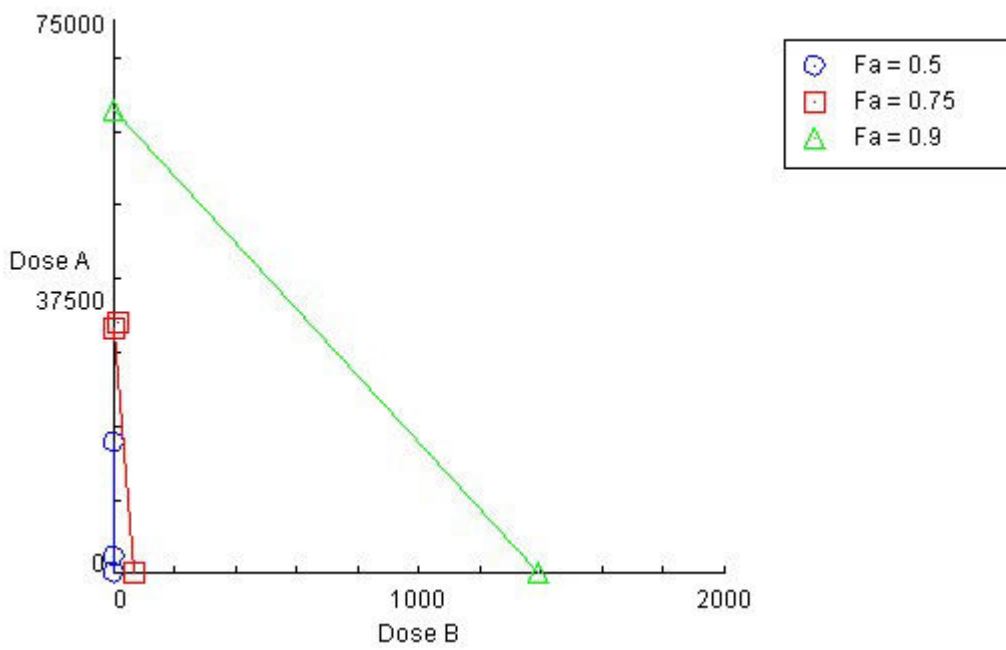

Polygonogram at Fa = 0.9

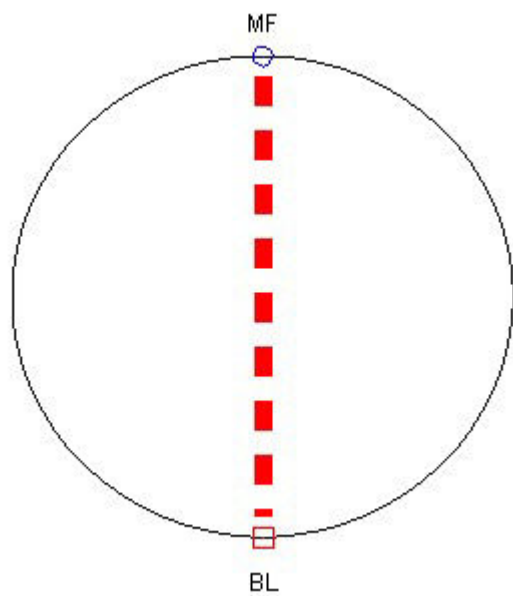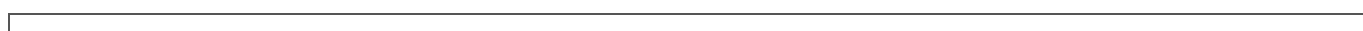

...Data for Drug: MF [uM]

| <b>Dose</b> | <b>Effect</b> |
|-------------|---------------|
| 7870.0      | 0.11052       |
| 7870.0      | 0.17368       |
| 7870.0      | 0.11707       |
| 15750.0     | 0.12162       |
| 15750.0     | 0.16401       |
| 15750.0     | 0.08268       |
| 39390.0     | 0.37882       |
| 39390.0     | 0.33214       |
| 39390.0     | 0.66741       |
| 78780.0     | 0.99824       |
| 78780.0     | 0.94378       |
| 78780.0     | 0.95238       |
| 157520.     | 0.99816       |
| 157520.     | 0.99783       |
| 157520.     | 0.98453       |
| 42510.0     | 0.48319       |
| 42510.0     | 0.49056       |

17 data points entered.

**X-int:** 4.40963

**Y-int:** -11.934 +/- 1.61396

**m:** 2.70630 +/- 0.35193

**Dm:** 25682.3

**r:** 0.89312

---

Data for Drug: BL [uM]

| <b>Dose</b> | <b>Effect</b> |
|-------------|---------------|
| 10.0        | 0.63176       |
| 10.0        | 0.41297       |
| 20.0        | 0.81331       |
| 20.0        | 0.56917       |
| 50.0        | 0.86886       |
| 50.0        | 0.88044       |
| 100.0       | 0.91241       |
| 100.0       | 0.95258       |
| 10.241      | 0.60008       |
| 10.241      | 0.71813       |

10 data points entered.

**X-int:** 0.86194

**Y-int:** -0.8670 +/- 0.24348

**m:** 1.00590 +/- 0.16722

**Dm:** 7.27686

**r:** 0.90495

---

Data for Drug Combo: MF-BL (MF+BL [4150.96:1])

| Dose A   | Effect  |
|----------|---------|
| 42510.0+ | 0.86516 |
| 21255.0+ | 0.64859 |
| 5313.75+ | 0.33117 |
| 42499.8+ | 0.80689 |
| 21255.0+ | 0.63267 |
| 5313.75+ | 0.31822 |

6 data points entered.

**X-int:** 4.03369

**Y-int:** -4.4970 +/- 0.43966

**m:** 1.11485 +/- 0.10360

**Dm:** 10806.7

**r:** 0.98316

Dose-Effect Curve

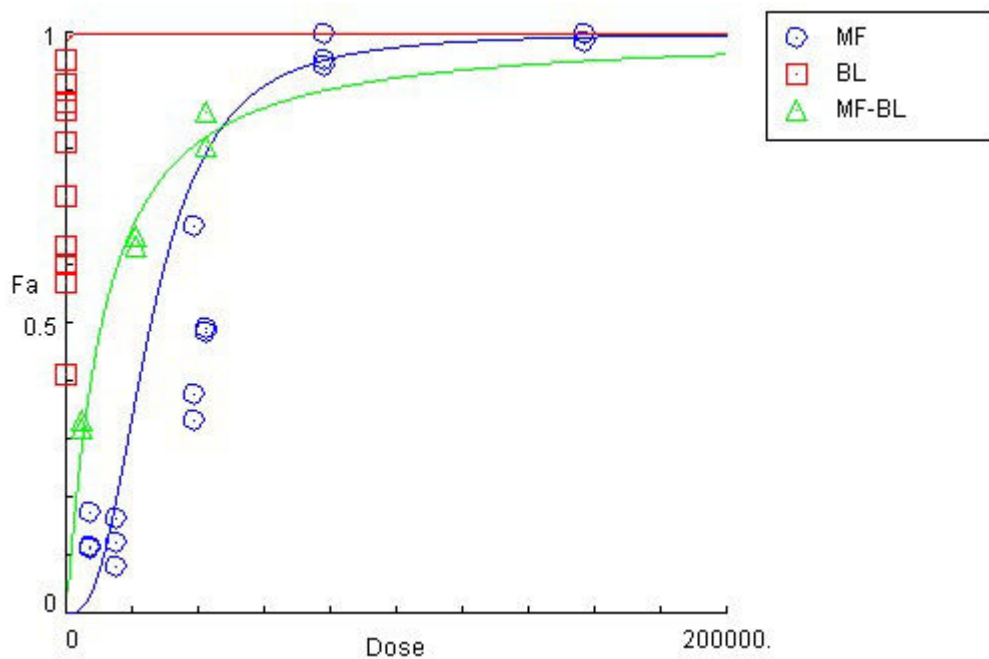

Median-Effect Plot

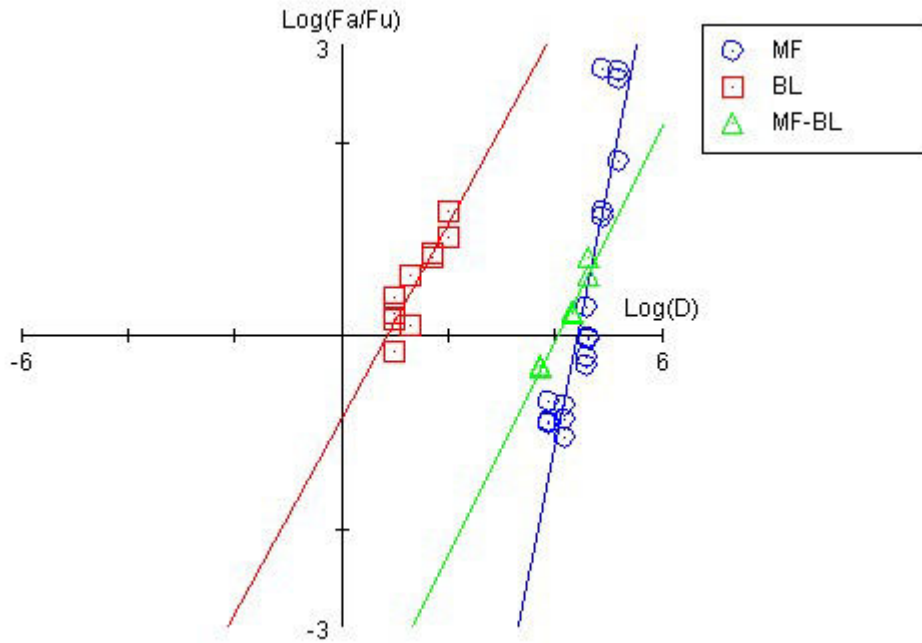

CI Data for Drug Combo: MF-BL (MF+BL [4150.96:1])

| Fa   | CI Value | S.D.A. Analysis     |
|------|----------|---------------------|
| 0.05 | 0.56515  | 0.57267 +/- 0.15731 |
| 0.1  | 0.57481  | 0.57998 +/- 0.12021 |
| 0.15 | 0.59183  | 0.59585 +/- 0.10018 |
| 0.2  | 0.61173  | 0.61502 +/- 0.08647 |
| 0.25 | 0.63363  | 0.63641 +/- 0.07605 |
| 0.3  | 0.65743  | 0.65983 +/- 0.06770 |
| 0.35 | 0.68334  | 0.68543 +/- 0.06084 |
| 0.4  | 0.71173  | 0.71358 +/- 0.05525 |
| 0.45 | 0.74315  | 0.74480 +/- 0.05090 |
| 0.5  | 0.77836  | 0.77986 +/- 0.04797 |
| 0.55 | 0.81843  | 0.81981 +/- 0.04679 |
| 0.6  | 0.86486  | 0.86617 +/- 0.04786 |
| 0.65 | 0.91993  | 0.92119 +/- 0.05176 |
| 0.7  | 0.98715  | 0.98844 +/- 0.05920 |
| 0.75 | 1.07244  | 1.07382 +/- 0.07123 |
| 0.8  | 1.18663  | 1.18825 +/- 0.08994 |
| 0.85 | 1.35251  | 1.35460 +/- 0.12015 |
| 0.9  | 1.62950  | 1.63266 +/- 0.17568 |
| 0.95 | 2.25690  | 2.26338 +/- 0.31811 |
| 0.97 | 2.88696  | 2.89771 +/- 0.47942 |

CI values for actual experimental points:

| Total Dose | Fa      | CI Value |
|------------|---------|----------|
| 42520.2    | 0.86516 | 1.05456  |
| 21260.1    | 0.64859 | 1.04253  |
| 5315.03    | 0.33117 | 0.62209  |
| 42510.0    | 0.80689 | 1.31518  |

| Total Dose | Fa      | CI Value |
|------------|---------|----------|
| 21260.1    | 0.63267 | 1.08683  |
| 5315.03    | 0.31822 | 0.64939  |

Combination Index Plot

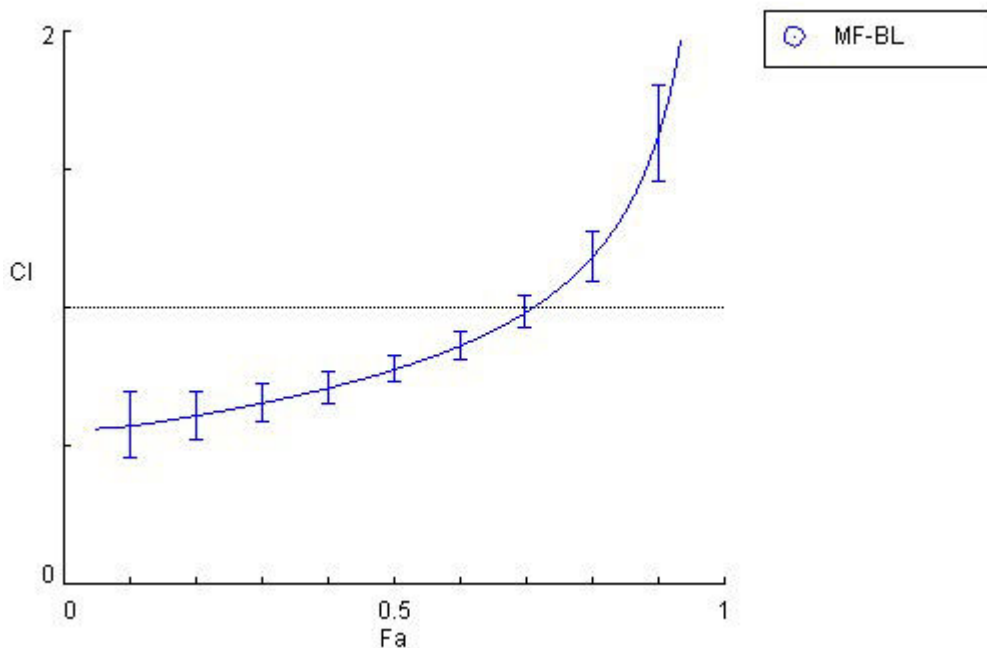

Logarithmic Combination Index Plot

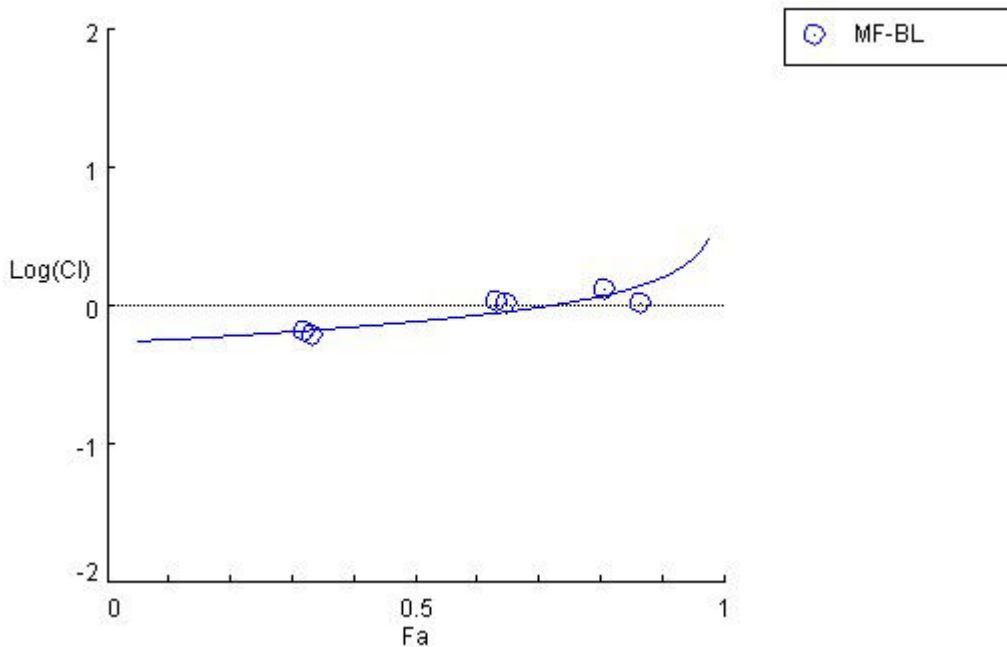

DRI Data for Drug Combo: MF-BL (MF+BL [4150.96:1])

| Fa   | Dose MF | Dose BL | DRI MF  | DRI BL  |
|------|---------|---------|---------|---------|
| 0.05 | 8652.15 | 0.38966 | 11.2345 | 2.10024 |
| 0.1  | 11403.4 | 0.81903 | 7.57500 | 2.25838 |
| 0.15 | 13529.2 | 1.29728 | 5.93479 | 2.36219 |
| 0.2  | 15387.5 | 1.83407 | 4.93874 | 2.44350 |

| Fa   | Dose MF | Dose BL | DRI MF  | DRI BL  |
|------|---------|---------|---------|---------|
| 0.25 | 17113.3 | 2.44130 | 4.24340 | 2.51276 |
| 0.3  | 18778.6 | 3.13419 | 3.71658 | 2.57486 |
| 0.35 | 20431.2 | 3.93256 | 3.29499 | 2.63260 |
| 0.4  | 22108.9 | 4.86279 | 2.94394 | 2.68780 |
| 0.45 | 23846.9 | 5.96081 | 2.64250 | 2.74181 |
| 0.5  | 25682.3 | 7.27686 | 2.37709 | 2.79579 |
| 0.55 | 27659.1 | 8.88348 | 2.13834 | 2.85083 |
| 0.6  | 29833.3 | 10.8894 | 1.91939 | 2.90812 |
| 0.65 | 32283.1 | 13.4652 | 1.71490 | 2.96909 |
| 0.7  | 35124.1 | 16.8952 | 1.52037 | 3.03567 |
| 0.75 | 38542.1 | 21.6903 | 1.33161 | 3.11070 |
| 0.8  | 42864.8 | 28.8717 | 1.14413 | 3.19887 |
| 0.85 | 48752.4 | 40.8181 | 0.95211 | 3.30897 |
| 0.9  | 57841.0 | 64.6531 | 0.74595 | 3.46109 |
| 0.95 | 76233.4 | 135.893 | 0.50297 | 3.72169 |
| 0.97 | 92782.0 | 230.536 | 0.37997 | 3.91897 |

DRI values calculated at experimental points

| Fa      | Dose MF | Dose BL | DRI MF  | DRI BL  |
|---------|---------|---------|---------|---------|
| 0.86516 | 51043.1 | 46.1851 | 1.20073 | 4.50983 |
| 0.64859 | 32209.3 | 13.3826 | 1.51538 | 2.61353 |
| 0.33117 | 19807.8 | 3.61801 | 3.72765 | 2.82629 |
| 0.80689 | 43561.9 | 30.1523 | 1.02499 | 2.94498 |
| 0.63267 | 31396.8 | 12.4935 | 1.47715 | 2.43990 |
| 0.31822 | 19380.3 | 3.41175 | 3.64721 | 2.66517 |

DRI Plot for Combo: MF-BL (MF+BL [4150.96:1])

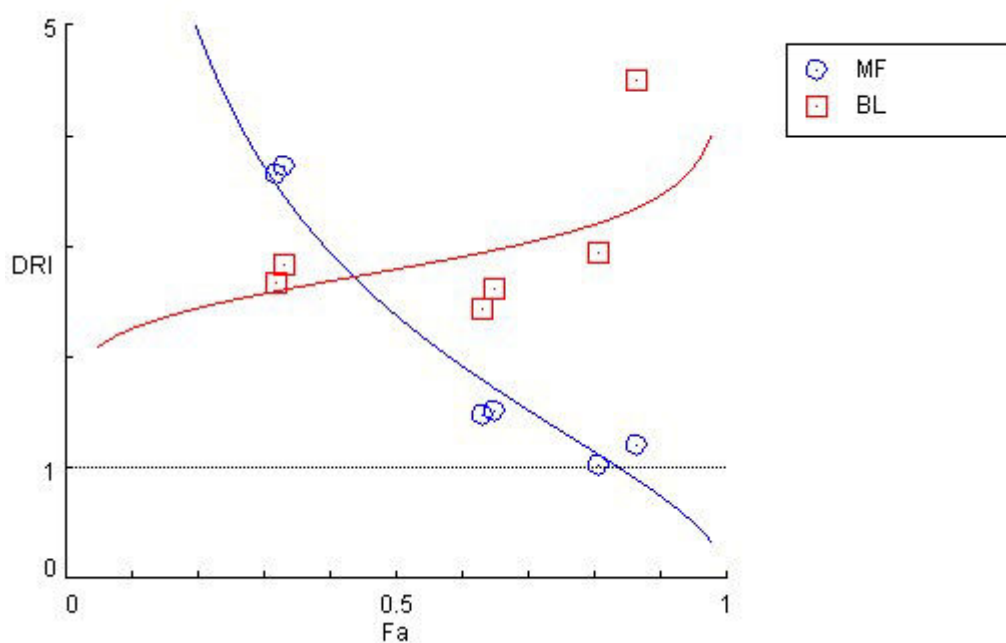

Log(DRI) Plot for Combo: MF-BL (MF+BL [4150.96:1])

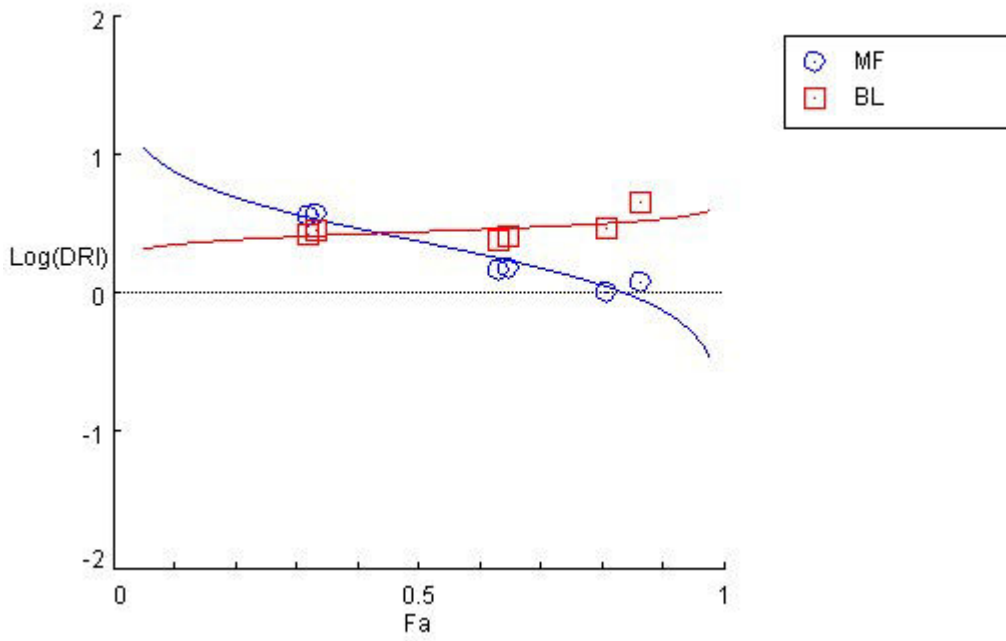

Isobologram for Combo: MF-BL (MF+BL [4150.96:1])

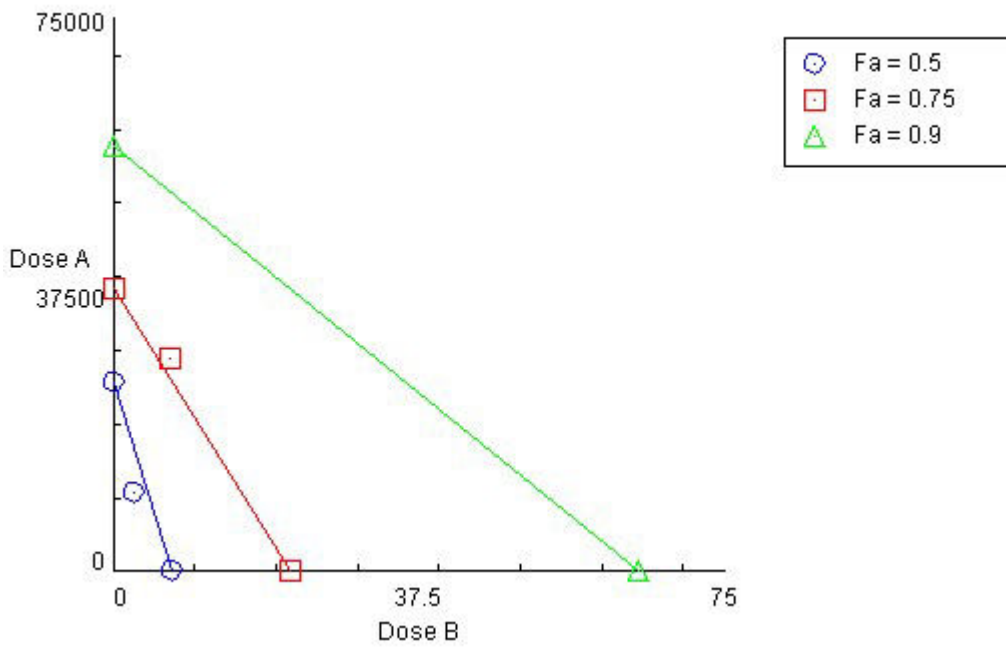

Polygonogram at Fa = 0.9



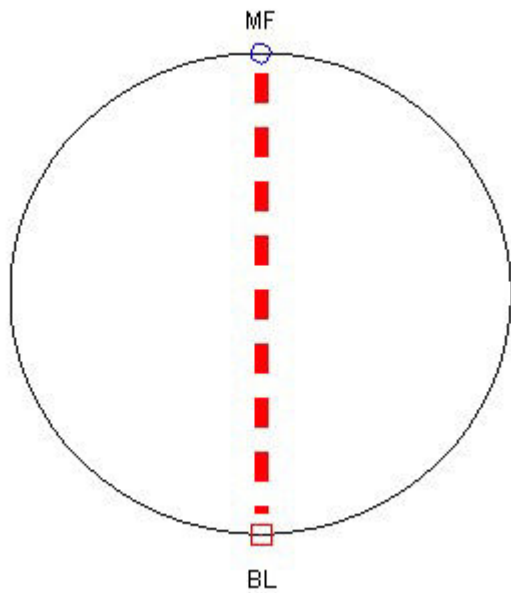

...Data for Drug: DCA [uM]

| <b>Dose</b> | <b>Effect</b> |
|-------------|---------------|
| 10000.0     | 0.04902       |
| 10000.0     | 0.16305       |
| 10000.0     | 0.05046       |
| 20000.0     | 0.30530       |
| 20000.0     | 0.44119       |
| 20000.0     | 0.21838       |
| 50000.0     | 0.62232       |
| 50000.0     | 0.77349       |
| 50000.0     | 0.83703       |
| 100000.     | 0.93638       |
| 100000.     | 0.98682       |
| 100000.     | 0.94815       |
| 29200.0     | 0.53133       |
| 29200.0     | 0.50894       |

14 data points entered.

**X-int:** 4.45014

**Y-int:** -10.965 +/- 0.88837

**m:** 2.46385 +/- 0.19703

**Dm:** 28193.2

**r:** 0.96371

---

Data for Drug: BL [uM]

| <b>Dose</b> | <b>Effect</b> |
|-------------|---------------|
| 60.5        | 0.52692       |
| 10.0        | 0.17796       |
| 10.0        | 0.11899       |
| 20.0        | 0.29743       |
| 20.0        | 0.23117       |
| 50.0        | 0.50862       |
| 50.0        | 0.45673       |
| 100.0       | 0.67143       |
| 100.0       | 0.60417       |
| 60.5        | 0.57056       |

10 data points entered.

**X-int:** 1.73264

**Y-int:** -1.7941 +/- 0.11290

**m:** 1.03546 +/- 0.07069

**Dm:** 54.0306

**r:** 0.98186

---

Data for Drug Combo: DCA-BL (DCA+BL [482.645:1])

| <b>Dose A</b> | <b>Effect</b> |
|---------------|---------------|
| 29200.0+      | 0.73375       |

| Dose A   | Effect  |
|----------|---------|
| 14600.0+ | 0.38864 |
| 3650.00+ | 0.15152 |
| 29200.0+ | 0.72727 |
| 14600.0+ | 0.35907 |
| 3650.00+ | 0.06238 |

6 data points entered.

**X-int:** 4.23240  
**Y-int:** -6.3481 +/- 0.83332  
**m:** 1.49988 +/- 0.20413  
**Dm:** 17076.5  
**r:** 0.96489

Dose-Effect Curve

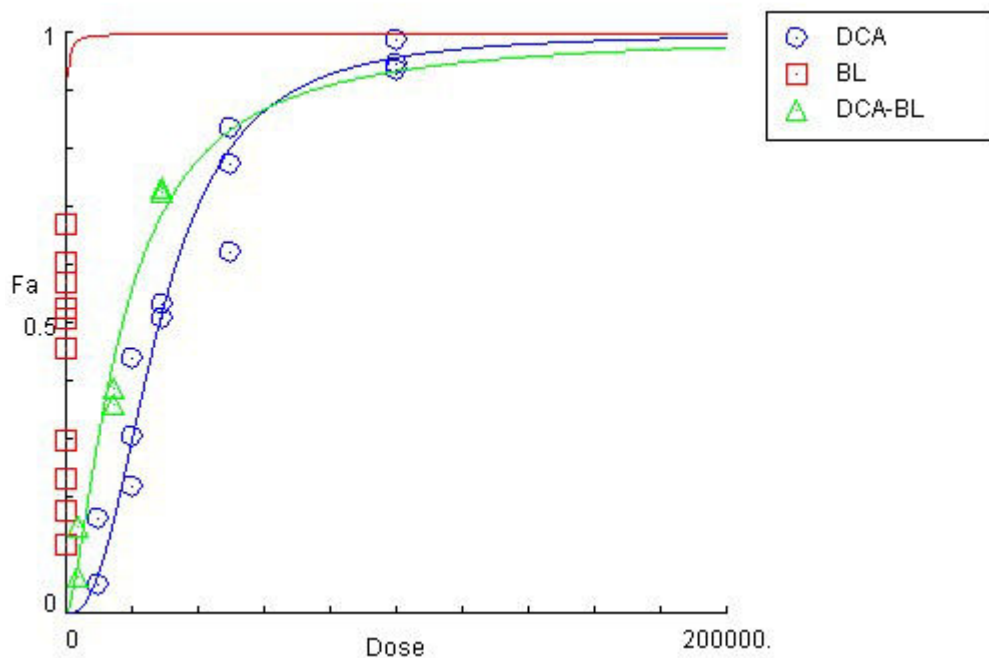

Median-Effect Plot

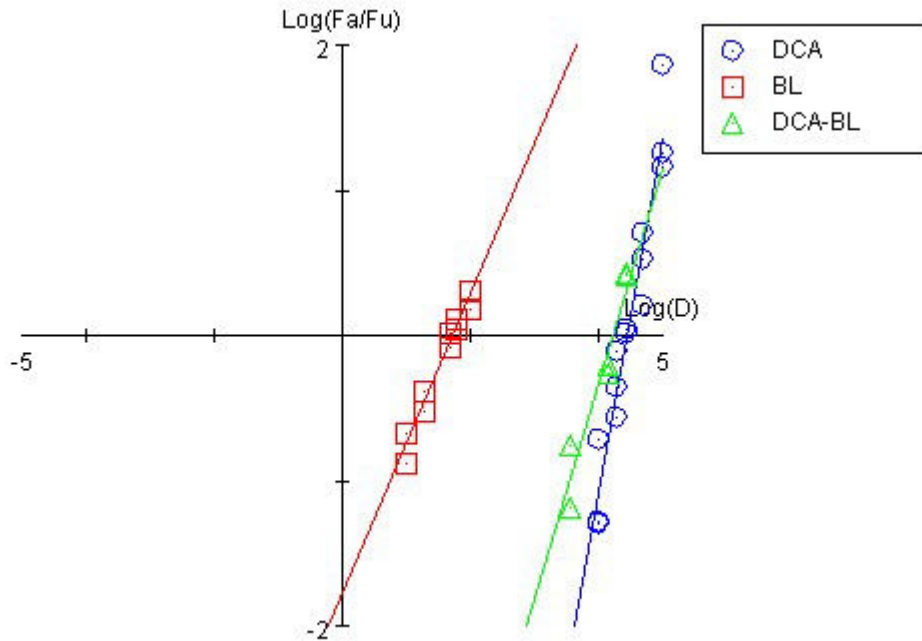

CI Data for Drug Combo: DCA-BL (DCA+BL [482.645:1])

| Fa   | CI Value | S.D.A. Analysis     |
|------|----------|---------------------|
| 0.05 | 1.85665  | 1.86309 +/- 0.37057 |
| 0.1  | 1.60137  | 1.60444 +/- 0.23903 |
| 0.15 | 1.48221  | 1.48409 +/- 0.17809 |
| 0.2  | 1.41019  | 1.41151 +/- 0.14033 |
| 0.25 | 1.36147  | 1.36249 +/- 0.11373 |
| 0.3  | 1.32650  | 1.32738 +/- 0.09366 |
| 0.35 | 1.30068  | 1.30151 +/- 0.07808 |
| 0.4  | 1.28150  | 1.28234 +/- 0.06607 |
| 0.45 | 1.26751  | 1.26843 +/- 0.05739 |
| 0.5  | 1.25793  | 1.25896 +/- 0.05224 |
| 0.55 | 1.25235  | 1.25355 +/- 0.05097 |
| 0.6  | 1.25074  | 1.25216 +/- 0.05368 |
| 0.65 | 1.25342  | 1.25512 +/- 0.06013 |
| 0.7  | 1.26117  | 1.26324 +/- 0.07005 |
| 0.75 | 1.27553  | 1.27808 +/- 0.08359 |
| 0.8  | 1.29949  | 1.30269 +/- 0.10166 |
| 0.85 | 1.33932  | 1.34350 +/- 0.12681 |
| 0.9  | 1.41095  | 1.41677 +/- 0.16602 |
| 0.95 | 1.57385  | 1.58343 +/- 0.24648 |
| 0.97 | 1.72786  | 1.74120 +/- 0.32040 |

CI values for actual experimental points:

| Total Dose | Fa      | CI Value |
|------------|---------|----------|
| 29260.5    | 0.73375 | 1.10702  |
| 14630.3    | 0.38864 | 1.48955  |
| 3657.56    | 0.15152 | 0.99938  |
| 29260.5    | 0.72727 | 1.12983  |

| Total Dose | Fa      | CI Value |
|------------|---------|----------|
| 14630.3    | 0.35907 | 1.63486  |
| 3657.56    | 0.06238 | 2.30621  |

Combination Index Plot

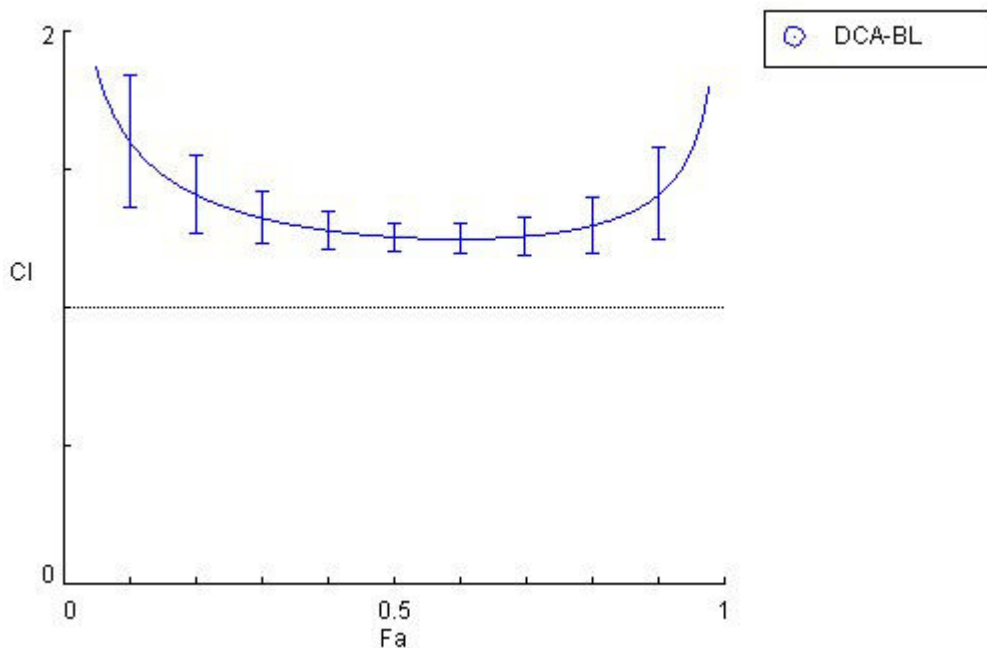

Logarithmic Combination Index Plot

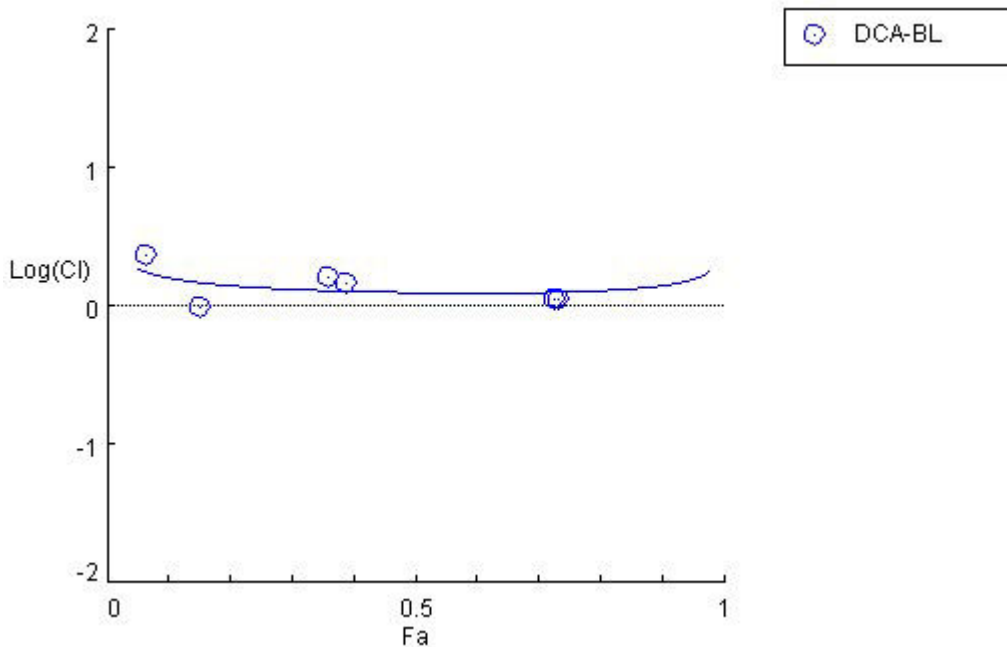

DRI Data for Drug Combo: DCA-BL (DCA+BL [482.645:1])

| Fa   | Dose DCA | Dose BL | DRI DCA | DRI BL  |
|------|----------|---------|---------|---------|
| 0.05 | 8533.72  | 3.14541 | 3.56623 | 0.63442 |
| 0.1  | 11557.1  | 6.47256 | 2.93467 | 0.79326 |
| 0.15 | 13944.2  | 10.1184 | 2.60106 | 0.91095 |
| 0.2  | 16061.5  | 14.1644 | 2.37515 | 1.01095 |

| Fa   | Dose DCA | Dose BL | DRI DCA | DRI BL  |
|------|----------|---------|---------|---------|
| 0.25 | 18050.8  | 18.7007 | 2.20344 | 1.10177 |
| 0.3  | 19989.1  | 23.8377 | 2.06363 | 1.18776 |
| 0.35 | 21929.5  | 29.7167 | 1.94434 | 1.27167 |
| 0.4  | 23915.2  | 36.5240 | 1.83898 | 1.35553 |
| 0.45 | 25988.0  | 44.5117 | 1.74332 | 1.44114 |
| 0.5  | 28193.2  | 54.0306 | 1.65441 | 1.53027 |
| 0.55 | 30585.5  | 65.5851 | 1.57004 | 1.62490 |
| 0.6  | 33236.4  | 79.9283 | 1.48837 | 1.72752 |
| 0.65 | 36246.0  | 98.2377 | 1.40771 | 1.84145 |
| 0.7  | 39764.4  | 122.466 | 1.32634 | 1.97153 |
| 0.75 | 44034.4  | 156.107 | 1.24218 | 2.12541 |
| 0.8  | 49488.1  | 206.102 | 1.15238 | 2.31634 |
| 0.85 | 57002.7  | 288.515 | 1.05229 | 2.57062 |
| 0.9  | 68776.6  | 451.028 | 0.93267 | 2.95201 |
| 0.95 | 93142.8  | 928.114 | 0.76750 | 3.69112 |
| 0.97 | 115575.  | 1550.93 | 0.66811 | 4.32717 |

DRI values calculated at experimental points

| Fa      | Dose DCA | Dose BL | DRI DCA | DRI BL  |
|---------|----------|---------|---------|---------|
| 0.73375 | 42543.3  | 143.821 | 1.45696 | 2.37720 |
| 0.38864 | 23457.9  | 34.8841 | 1.60670 | 1.15319 |
| 0.15152 | 14011.5  | 10.2350 | 3.83877 | 1.35340 |
| 0.72727 | 41978.9  | 139.322 | 1.43763 | 2.30285 |
| 0.35907 | 22285.2  | 30.8766 | 1.52638 | 1.02071 |
| 0.06238 | 9385.30  | 3.94433 | 2.57132 | 0.52156 |

DRI Plot for Combo: DCA-BL (DCA+BL [482.645:1])

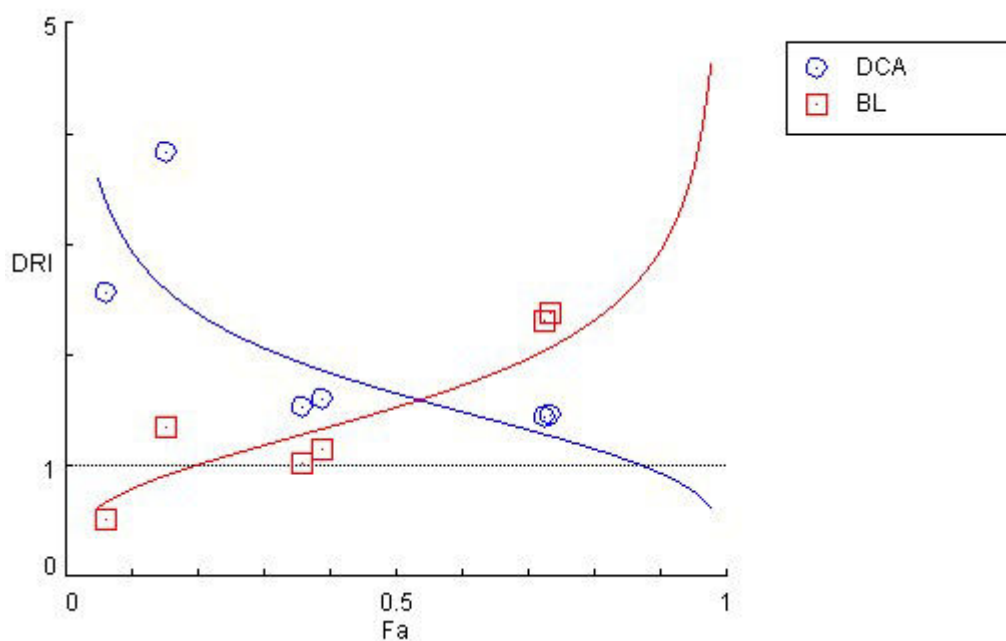

Log(DRI) Plot for Combo: DCA-BL (DCA+BL [482.645:1])

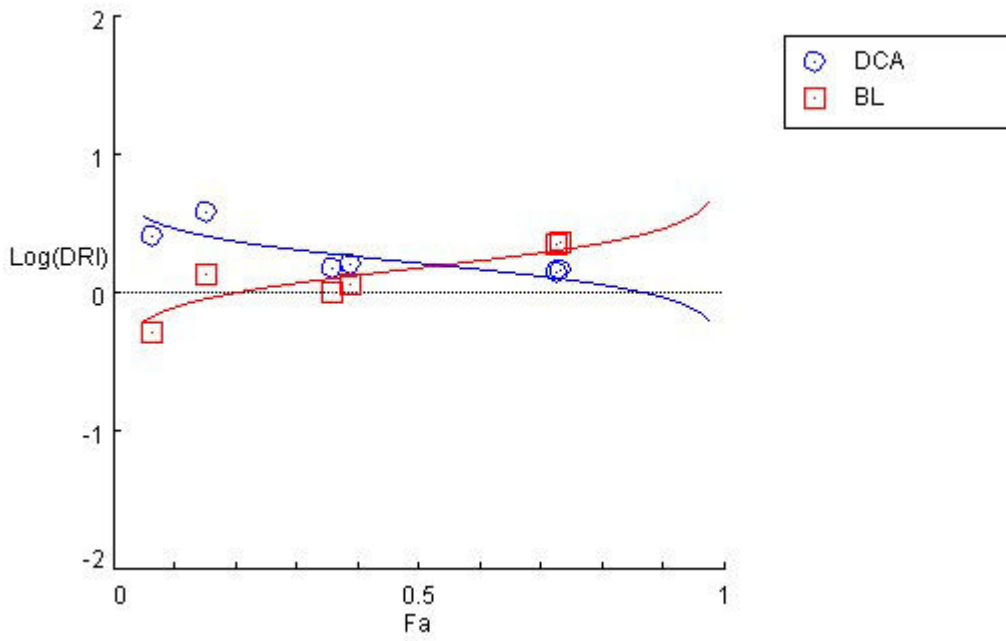

Isobologram for Combo: DCA-BL (DCA+BL [482.645:1])

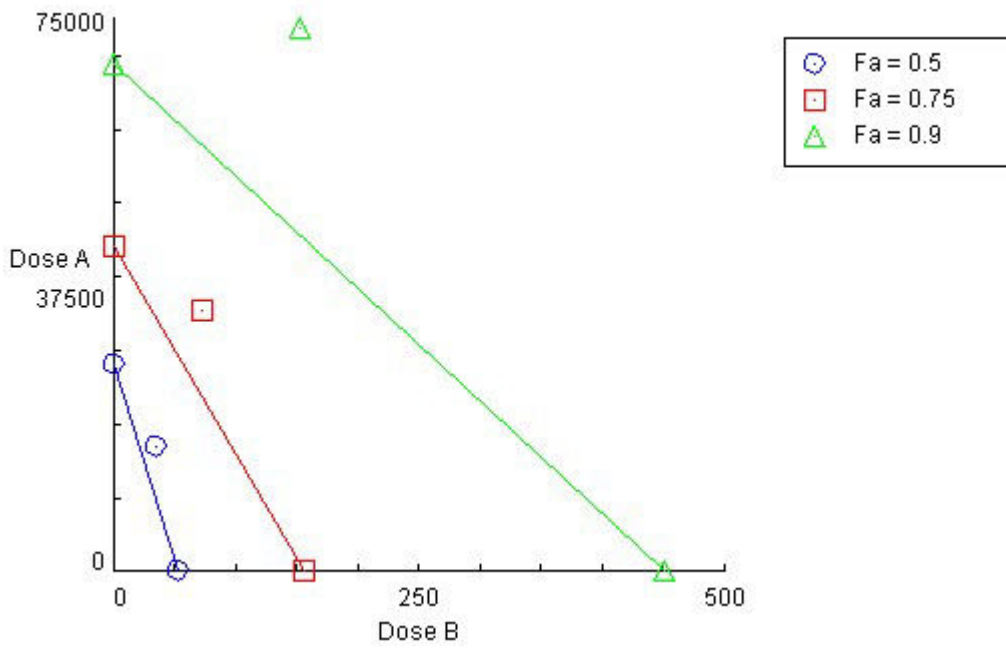

Polygonogram at Fa = 0.9

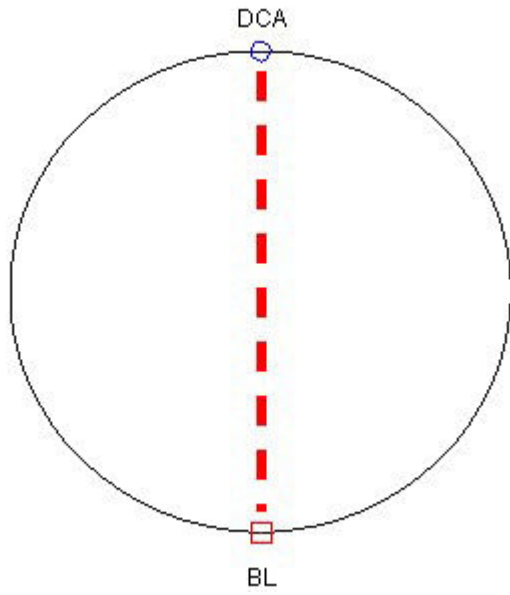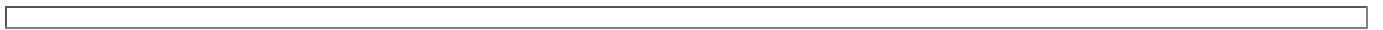



...Data for Drug: DCA [uM]

| <b>Dose</b> | <b>Effect</b> |
|-------------|---------------|
| 10000.0     | 0.01216       |
| 10000.0     | 0.08649       |
| 10000.0     | 0.01          |
| 20000.0     | 0.17153       |
| 20000.0     | 0.08551       |
| 20000.0     | 0.03562       |
| 50000.0     | 0.71466       |
| 50000.0     | 0.69233       |
| 50000.0     | 0.45257       |
| 100000.     | 0.96291       |
| 100000.     | 0.93367       |
| 100000.     | 0.88499       |
| 40613.0     | 0.39533       |
| 40613.0     | 0.54637       |

14 data points entered.

**X-int:** 4.61751

**Y-int:** -13.134 +/- 1.12148

**m:** 2.84432 +/- 0.24760

**Dm:** 41448.5

**r:** 0.95742

---

Data for Drug: BL [uM]

| <b>Dose</b> | <b>Effect</b> |
|-------------|---------------|
| 50.0        | 0.47634       |
| 50.0        | 0.54304       |
| 100.0       | 0.60608       |
| 100.0       | 0.64751       |
| 200.0       | 0.66695       |
| 200.0       | 0.70512       |
| 55.09       | 0.60225       |
| 55.09       | 0.64755       |

8 data points entered.

**X-int:** 1.42816

**Y-int:** -0.5666 +/- 0.26652

**m:** 0.39676 +/- 0.13666

**Dm:** 26.8018

**r:** 0.76430

---

Data for Drug Combo: DCA-BL (DCA+BL [737.21:1])

| <b>Dose A</b> | <b>Effect</b> |
|---------------|---------------|
| 40612.9+      | 0.74799       |
| 20306.5+      | 0.33011       |
| 5076.61+      | 0.11433       |

**Dose A**    **Effect**  
 40612.9+    0.86172  
 20306.5+    0.63912  
 5076.61+    0.19056

6 data points entered.

**X-int:** 4.24238

**Y-int:** -6.3396 +/- 1.23943

**m:** 1.49434 +/- 0.29338

**Dm:** 17473.4

**r:** 0.93081

### Dose-Effect Curve

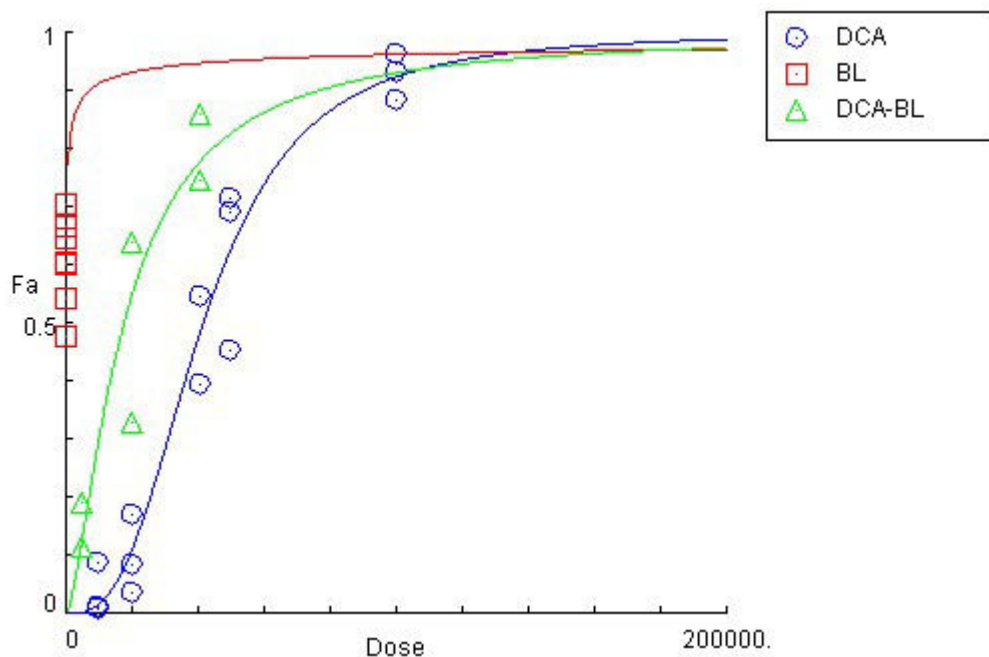

### Median-Effect Plot

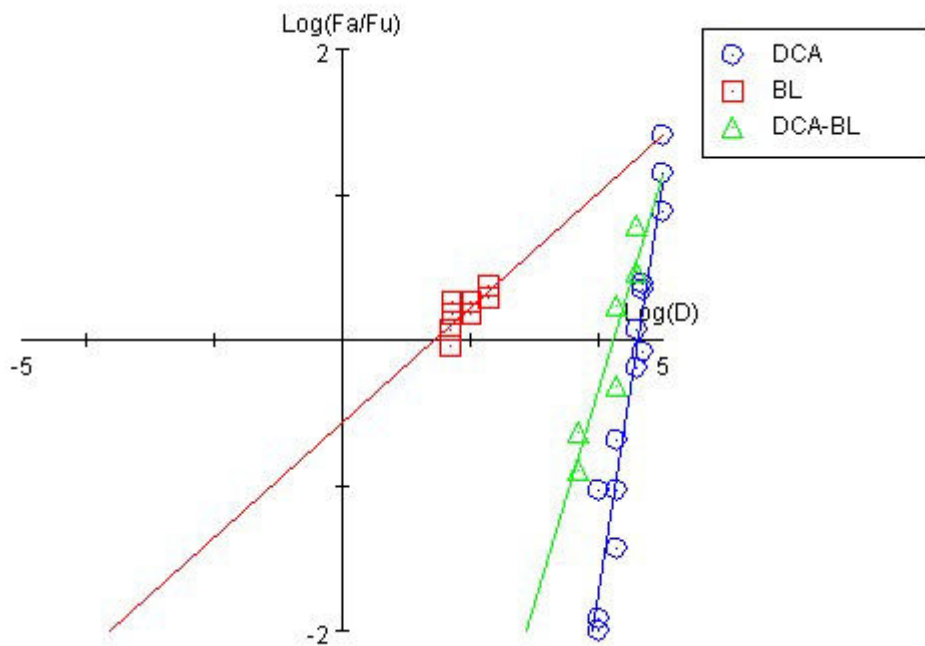

CI Data for Drug Combo: DCA-BL (DCA+BL [737.21:1])

| <b>Fa</b> | <b>CI Value</b> | <b>S.D.A. Analysis</b> |
|-----------|-----------------|------------------------|
| 0.05      | 205.886         | 351.369 +/- 1550.60    |
| 0.1       | 51.7963         | 69.8908 +/- 198.035    |
| 0.15      | 22.1507         | 26.9666 +/- 54.5052    |
| 0.2       | 11.7678         | 13.4981 +/- 20.3489    |
| 0.25      | 7.04671         | 7.77134 +/- 8.89349    |
| 0.3       | 4.56040         | 4.89081 +/- 4.25063    |
| 0.35      | 3.12379         | 3.28150 +/- 2.13598    |
| 0.4       | 2.24087         | 2.31760 +/- 1.09824    |
| 0.45      | 1.67546         | 1.71273 +/- 0.56550    |
| 0.5       | 1.30414         | 1.32195 +/- 0.28737    |
| 0.55      | 1.05782         | 1.06617 +/- 0.14679    |
| 0.6       | 0.89578         | 0.89980 +/- 0.08738    |
| 0.65      | 0.79323         | 0.79555 +/- 0.07355    |
| 0.7       | 0.73501         | 0.73695 +/- 0.07541    |
| 0.75      | 0.71234         | 0.71456 +/- 0.08116    |
| 0.8       | 0.72173         | 0.72457 +/- 0.09084    |
| 0.85      | 0.76598         | 0.76971 +/- 0.10827    |
| 0.9       | 0.86110         | 0.86624 +/- 0.14163    |
| 0.95      | 1.07636         | 1.08482 +/- 0.22136    |
| 0.97      | 1.27130         | 1.28333 +/- 0.30106    |

CI values for actual experimental points:

| <b>Total Dose</b> | <b>Fa</b> | <b>CI Value</b> |
|-------------------|-----------|-----------------|
| 40668.0           | 0.74799   | 0.80087         |
| 20334.0           | 0.33011   | 6.74493         |
| 5083.5            | 0.11433   | 44.9958         |
| 40668.0           | 0.86172   | 0.53540         |
| 20334.0           | 0.63912   | 0.64409         |
| 5083.5            | 0.19056   | 10.0447         |

Combination Index Plot

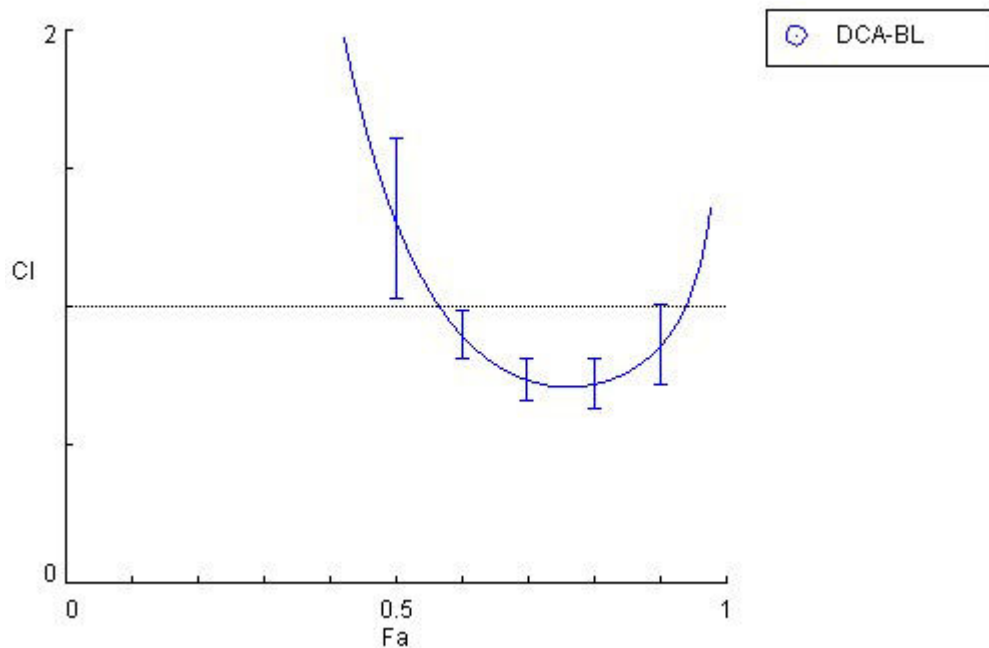

Logarithmic Combination Index Plot

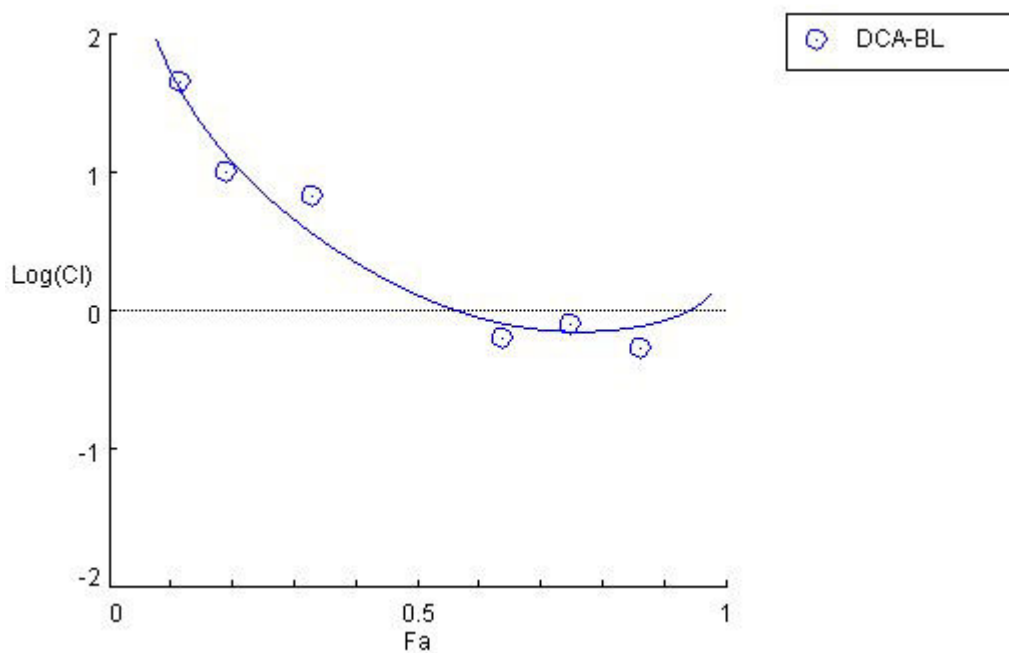

DRI Data for Drug Combo: DCA-BL (DCA+BL [737.21:1])

| Fa   | Dose DCA | Dose BL | DRI DCA | DRI BL  |
|------|----------|---------|---------|---------|
| 0.05 | 14720.6  | 0.01604 | 6.05155 | 0.00486 |
| 0.1  | 19143.3  | 0.10546 | 4.77308 | 0.01938 |
| 0.15 | 22524.5  | 0.33844 | 4.12084 | 0.04565 |
| 0.2  | 25458.8  | 0.81420 | 3.68928 | 0.08698 |
| 0.25 | 28168.5  | 1.68123 | 3.36713 | 0.14815 |
| 0.3  | 30770.6  | 3.16749 | 3.10881 | 0.23592 |
| 0.35 | 33341.8  | 5.63075 | 2.89140 | 0.35998 |
| 0.4  | 35941.7  | 9.64592 | 2.70177 | 0.53455 |
| 0.45 | 38625.0  | 16.1626 | 2.53163 | 0.78097 |

| Fa   | Dose DCA | Dose BL | DRI DCA | DRI BL  |
|------|----------|---------|---------|---------|
| 0.5  | 41448.5  | 26.8018 | 2.37531 | 1.13232 |
| 0.55 | 44478.3  | 44.4445 | 2.22864 | 1.64173 |
| 0.6  | 47798.9  | 74.4707 | 2.08829 | 2.39855 |
| 0.65 | 51526.3  | 127.574 | 1.95133 | 3.56170 |
| 0.7  | 55831.7  | 226.785 | 1.81487 | 5.43464 |
| 0.75 | 60989.3  | 427.270 | 1.67564 | 8.65406 |
| 0.8  | 67480.7  | 882.263 | 1.52932 | 14.7404 |
| 0.85 | 76271.4  | 2122.53 | 1.36916 | 28.0890 |
| 0.9  | 89742.7  | 6811.45 | 1.18207 | 66.1413 |
| 0.95 | 116705.  | 44785.5 | 0.93234 | 263.762 |
| 0.97 | 140692.  | 171037. | 0.78748 | 705.751 |

DRI values calculated at experimental points

| Fa      | Dose DCA | Dose BL | DRI DCA | DRI BL  |
|---------|----------|---------|---------|---------|
| 0.74799 | 60760.5  | 415.910 | 1.49609 | 7.54964 |
| 0.33011 | 32318.6  | 4.50331 | 1.59154 | 0.16349 |
| 0.11433 | 20179.8  | 0.15390 | 3.97505 | 0.02235 |
| 0.86172 | 78863.3  | 2697.08 | 1.94183 | 48.9577 |
| 0.63912 | 50673.3  | 113.186 | 2.49543 | 4.10913 |
| 0.19056 | 24926.4  | 0.69975 | 4.91005 | 0.10162 |

DRI Plot for Combo: DCA-BL (DCA+BL [737.21:1])

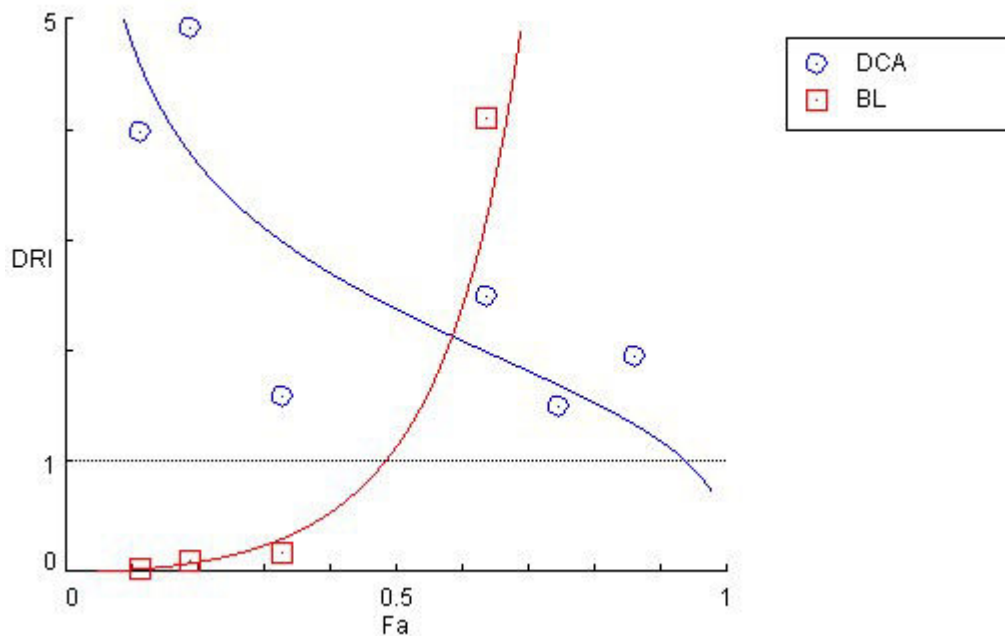

Log(DRI) Plot for Combo: DCA-BL (DCA+BL [737.21:1])

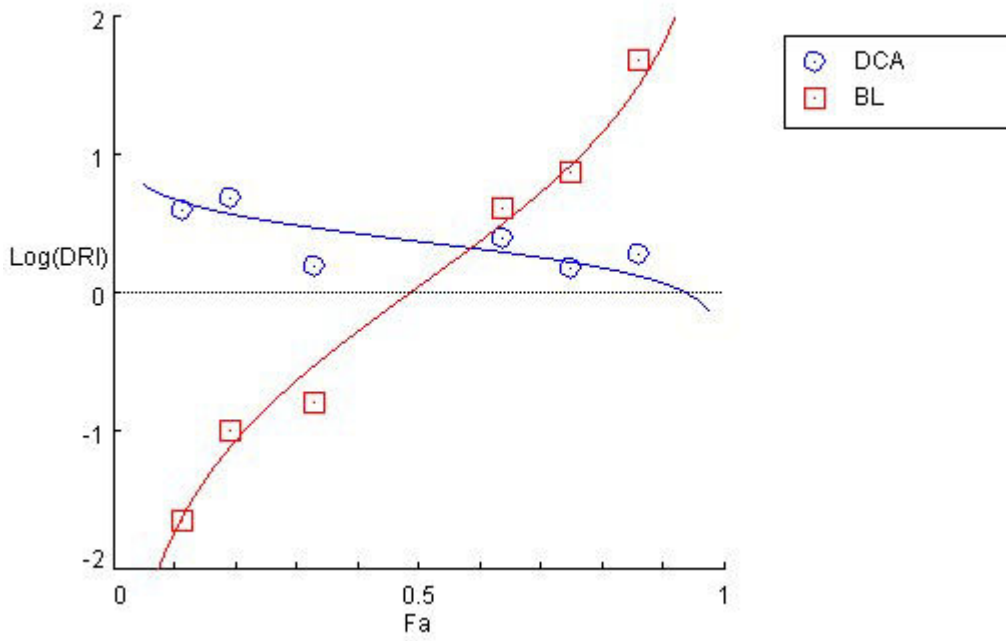

Isobologram for Combo: DCA-BL (DCA+BL [737.21:1])

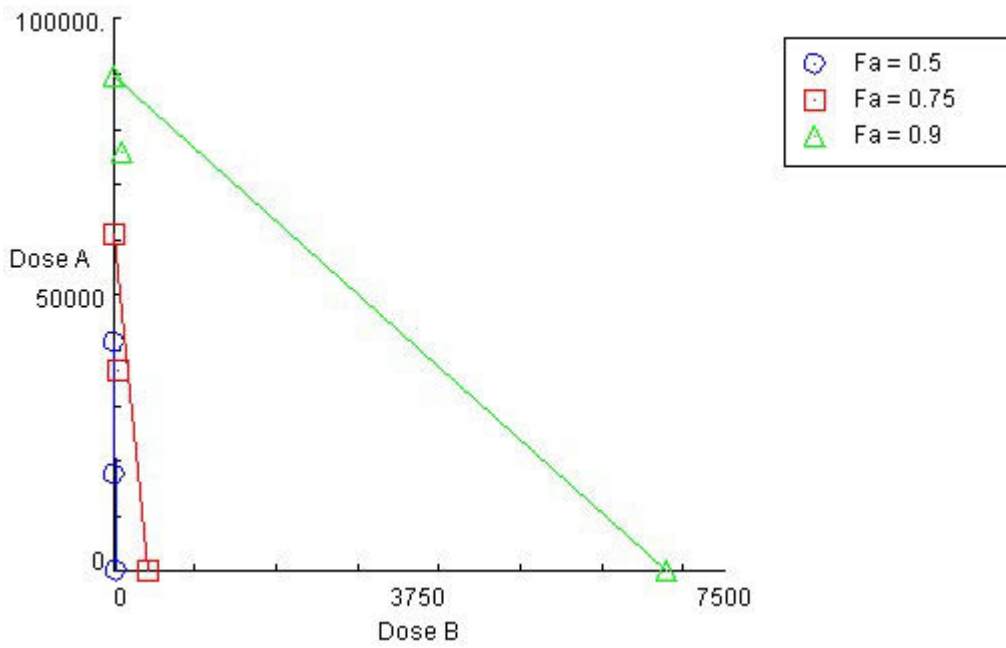

Polygonogram at  $F_a = 0.9$

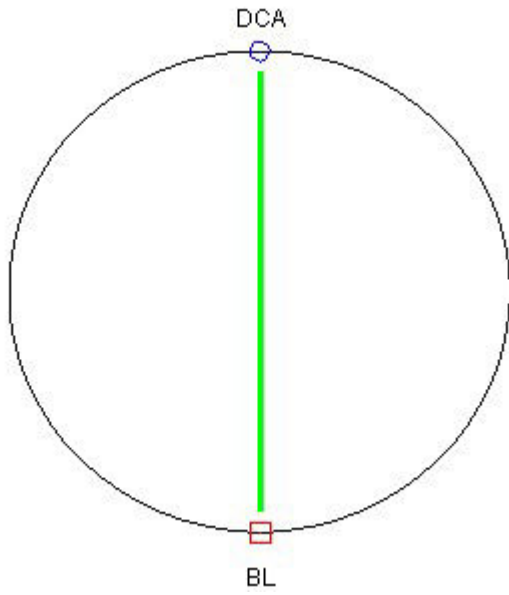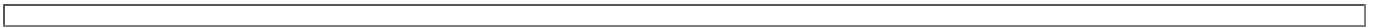

...Data for Drug: DCA [uM]

| <b>Dose</b> | <b>Effect</b> |
|-------------|---------------|
| 10000.0     | 0.29654       |
| 10000.0     | 0.38091       |
| 10000.0     | 0.64051       |
| 20000.0     | 0.51670       |
| 20000.0     | 0.54896       |
| 20000.0     | 0.74960       |
| 50000.0     | 0.87964       |
| 50000.0     | 0.88269       |
| 50000.0     | 0.93805       |
| 100000.     | 0.99          |
| 100000.     | 0.98576       |
| 100000.     | 0.98371       |
| 13516.5     | 0.32942       |
| 13516.5     | 0.2739        |

14 data points entered.

**X-int:** 4.17281

**Y-int:** -8.7537 +/- 0.86611

**m:** 2.09779 +/- 0.19406

**Dm:** 14887.0

**r:** 0.95230

---

Data for Drug: BL [uM]

| <b>Dose</b> | <b>Effect</b> |
|-------------|---------------|
| 50.0        | 0.68241       |
| 50.0        | 0.29706       |
| 100.0       | 0.85466       |
| 100.0       | 0.59909       |
| 200.0       | 0.94684       |
| 200.0       | 0.79812       |
| 11.8        | 0.50912       |
| 11.8        | 0.26492       |

8 data points entered.

**X-int:** 1.44869

**Y-int:** -1.3171 +/- 0.56419

**m:** 0.90918 +/- 0.30906

**Dm:** 28.0991

**r:** 0.76848

---

Data for Drug Combo: DCA-BL (DCA+BL [1145.46:1])

| <b>Dose A</b> | <b>Effect</b> |
|---------------|---------------|
| 13516.5+      | 0.44489       |
| 6758.25+      | 0.28218       |
| 1689.58+      | 0.05124       |



**Dose A**    **Effect**  
 13516.5+    0.35268  
 6758.25+    0.20802  
 1689.58+    0.02304

6 data points entered.

**X-int:** 4.22430

**Y-int:** -6.0390 +/- 0.67453

**m:** 1.42959 +/- 0.17994

**Dm:** 16761.2

**r:** 0.96975

### Dose-Effect Curve

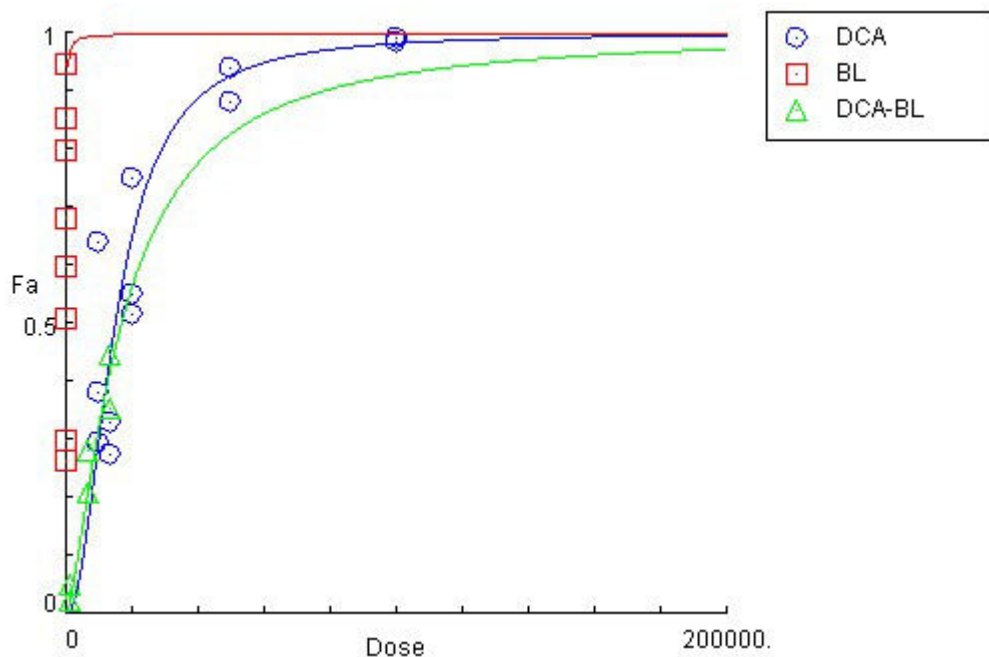

### Median-Effect Plot

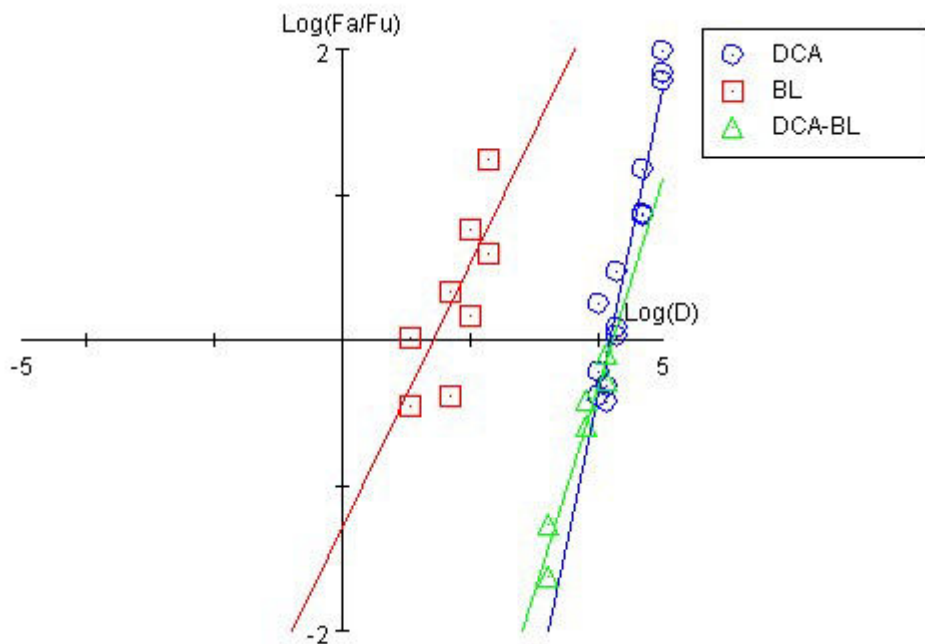

CI Data for Drug Combo: DCA-BL (DCA+BL [1145.46:1])

| <b>Fa</b> | <b>CI Value</b> | <b>S.D.A. Analysis</b> |
|-----------|-----------------|------------------------|
| 0.05      | 2.27514         | 2.36359 +/- 1.16726    |
| 0.1       | 1.94352         | 1.98382 +/- 0.61072    |
| 0.15      | 1.80634         | 1.82998 +/- 0.40343    |
| 0.2       | 1.73237         | 1.74777 +/- 0.29405    |
| 0.25      | 1.68844         | 1.69909 +/- 0.22767    |
| 0.3       | 1.66183         | 1.66952 +/- 0.18531    |
| 0.35      | 1.64663         | 1.65242 +/- 0.15889    |
| 0.4       | 1.63975         | 1.64432 +/- 0.14436    |
| 0.45      | 1.63955         | 1.64339 +/- 0.13925    |
| 0.5       | 1.64521         | 1.64868 +/- 0.14165    |
| 0.55      | 1.65648         | 1.65989 +/- 0.15004    |
| 0.6       | 1.67361         | 1.67723 +/- 0.16339    |
| 0.65      | 1.69736         | 1.70148 +/- 0.18134    |
| 0.7       | 1.72927         | 1.73418 +/- 0.20425    |
| 0.75      | 1.77204         | 1.77814 +/- 0.23342    |
| 0.8       | 1.83069         | 1.83853 +/- 0.27180    |
| 0.85      | 1.91545         | 1.92591 +/- 0.32578    |
| 0.9       | 2.05129         | 2.06619 +/- 0.41192    |
| 0.95      | 2.32795         | 2.35271 +/- 0.59380    |
| 0.97      | 2.56990         | 2.60422 +/- 0.76372    |

CI values for actual experimental points:

| <b>Total Dose</b> | <b>Fa</b> | <b>CI Value</b> |
|-------------------|-----------|-----------------|
| 13528.3           | 0.44489   | 1.54467         |
| 6764.15           | 0.28218   | 1.29482         |
| 1691.06           | 0.05124   | 1.75734         |
| 13528.3           | 0.35268   | 2.03173         |
| 6764.15           | 0.20802   | 1.77228         |
| 1691.06           | 0.02304   | 3.91434         |

Combination Index Plot

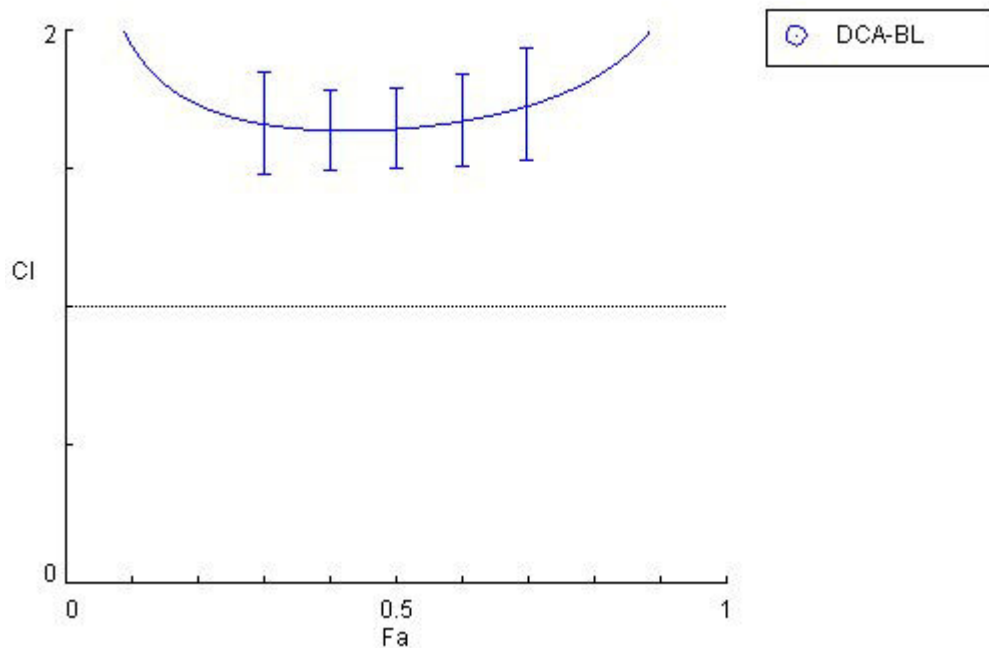

Logarithmic Combination Index Plot

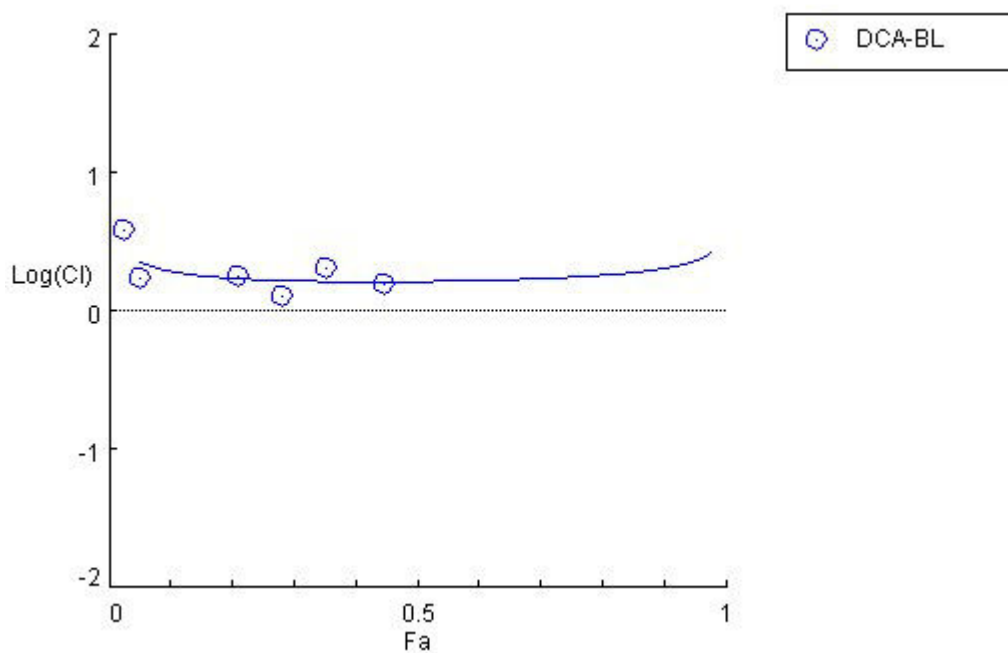

DRI Data for Drug Combo: DCA-BL (DCA+BL [1145.46:1])

| Fa   | Dose DCA | Dose BL | DRI DCA | DRI BL  |
|------|----------|---------|---------|---------|
| 0.05 | 3657.92  | 1.10205 | 1.71317 | 0.59122 |
| 0.1  | 5223.08  | 2.50684 | 1.45043 | 0.79740 |
| 0.15 | 6511.80  | 4.16977 | 1.30837 | 0.95967 |
| 0.2  | 7687.93  | 6.11633 | 1.21067 | 1.10329 |
| 0.25 | 8817.93  | 8.39286 | 1.13550 | 1.23798 |
| 0.3  | 9940.20  | 11.0651 | 1.07367 | 1.36903 |
| 0.35 | 11082.8  | 14.2230 | 1.02043 | 1.50004 |
| 0.4  | 12270.6  | 17.9892 | 0.97301 | 1.63396 |
| 0.45 | 13528.9  | 22.5339 | 0.92961 | 1.77359 |

| Fa   | Dose DCA | Dose BL | DRI DCA | DRI BL  |
|------|----------|---------|---------|---------|
| 0.5  | 14887.0  | 28.0991 | 0.88896 | 1.92197 |
| 0.55 | 16381.4  | 35.0388 | 0.85009 | 2.08277 |
| 0.6  | 18061.3  | 43.8909 | 0.81217 | 2.26075 |
| 0.65 | 19996.9  | 55.5129 | 0.77442 | 2.46258 |
| 0.7  | 22295.6  | 71.3556 | 0.73602 | 2.69824 |
| 0.75 | 25133.1  | 94.0753 | 0.69594 | 2.98388 |
| 0.8  | 28827.3  | 129.091 | 0.65273 | 3.34816 |
| 0.85 | 34033.9  | 189.353 | 0.60399 | 3.84921 |
| 0.9  | 42431.3  | 314.962 | 0.54483 | 4.63251 |
| 0.95 | 60586.9  | 716.450 | 0.46127 | 6.24809 |
| 0.97 | 78063.0  | 1285.72 | 0.40974 | 7.73029 |

DRI values calculated at experimental points

| Fa      | Dose DCA | Dose BL | DRI DCA | DRI BL  |
|---------|----------|---------|---------|---------|
| 0.44489 | 13396.3  | 22.0274 | 0.99110 | 1.86672 |
| 0.28218 | 9539.22  | 10.0623 | 1.41149 | 1.70547 |
| 0.05124 | 3703.09  | 1.13370 | 2.19172 | 0.76860 |
| 0.35268 | 11145.2  | 14.4084 | 0.82456 | 1.22105 |
| 0.20802 | 7871.01  | 6.45765 | 1.16465 | 1.09451 |
| 0.02304 | 2494.62  | 0.45567 | 1.47647 | 0.30892 |

DRI Plot for Combo: DCA-BL (DCA+BL [1145.46:1])

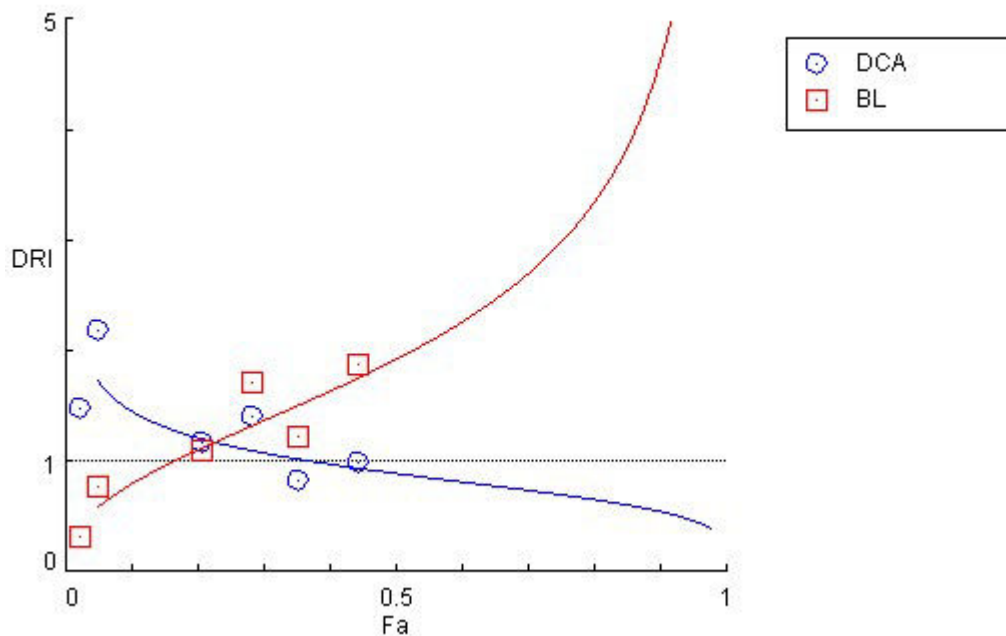

Log(DRI) Plot for Combo: DCA-BL (DCA+BL [1145.46:1])

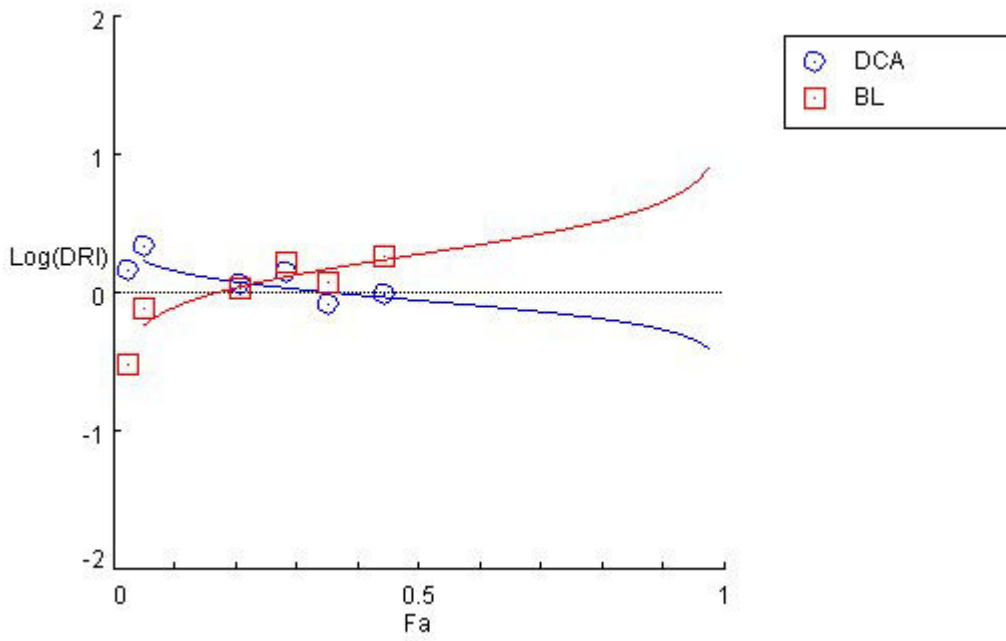

Isobologram for Combo: DCA-BL (DCA+BL [1145.46:1])

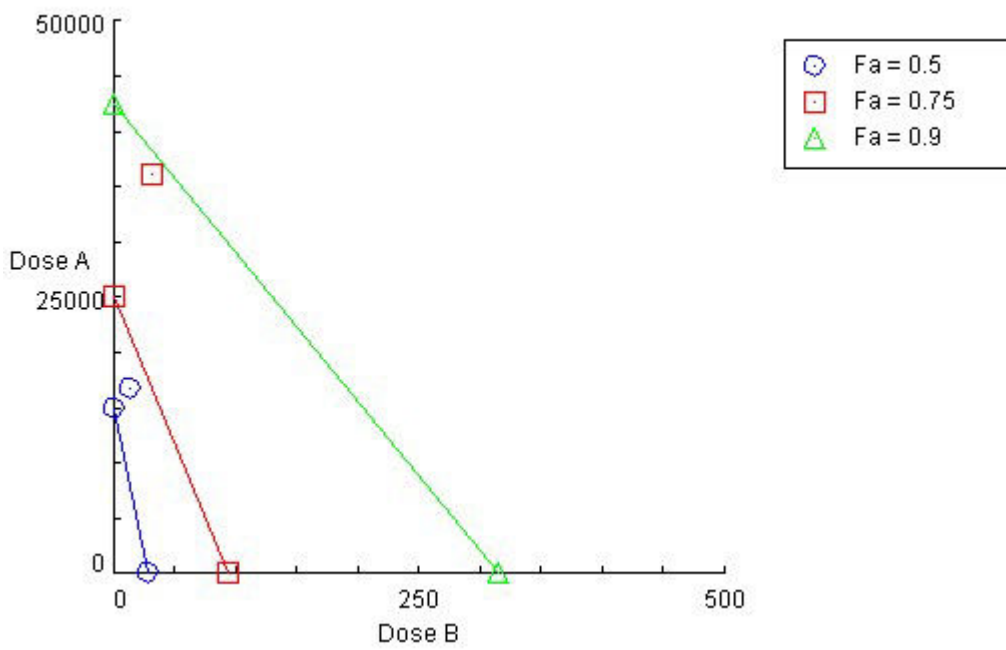

Polygonogram at Fa = 0.9

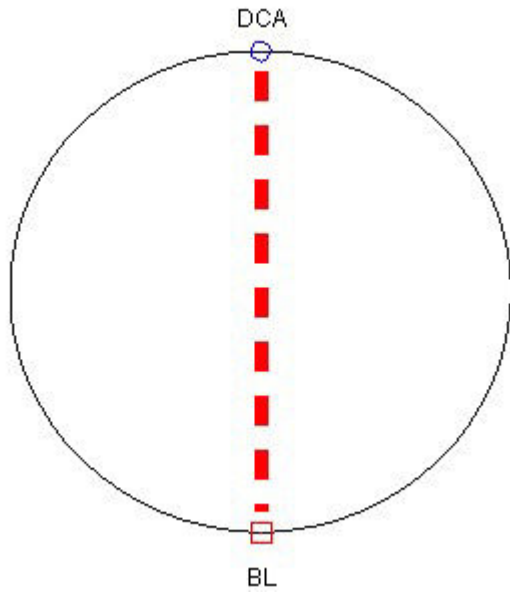

...Data for Drug: DCA [uM]

| <b>Dose</b> | <b>Effect</b> |
|-------------|---------------|
| 10000.0     | 0.22502       |
| 10000.0     | 0.01          |
| 10000.0     | 0.01          |
| 20000.0     | 0.23092       |
| 20000.0     | 0.21073       |
| 20000.0     | 0.25615       |
| 50000.0     | 0.87071       |
| 50000.0     | 0.86300       |
| 50000.0     | 0.89430       |
| 100000.     | 0.98360       |
| 100000.     | 0.98621       |
| 100000.     | 0.97747       |
| 27096.5     | 0.53809       |
| 27096.5     | 0.55887       |

14 data points entered.

**X-int:** 4.44890

**Y-int:** -14.593 +/- 1.21120

**m:** 3.28009 +/- 0.26890

**Dm:** 28112.5

**r:** 0.96196

---

Data for Drug: BL [uM]

| <b>Dose</b> | <b>Effect</b> |
|-------------|---------------|
| 10.0        | 0.63176       |
| 10.0        | 0.41297       |
| 20.0        | 0.81331       |
| 20.0        | 0.56917       |
| 50.0        | 0.86886       |
| 50.0        | 0.88044       |
| 100.0       | 0.91241       |
| 100.0       | 0.95258       |
| 10.241      | 0.61994       |
| 10.241      | 0.65059       |

10 data points entered.

**X-int:** 0.88493

**Y-int:** -0.9126 +/- 0.22509

**m:** 1.03128 +/- 0.15459

**Dm:** 7.67233

**r:** 0.92066

---

Data for Drug Combo: DCA-BL (DCA+BL [2645.88:1])

| <b>Dose A</b> | <b>Effect</b> |
|---------------|---------------|
| 27096.5+      | 0.66694       |

| Dose A   | Effect  |
|----------|---------|
| 13548.3+ | 0.50932 |
| 3387.06+ | 0.27877 |
| 27096.5+ | 0.69409 |
| 13548.3+ | 0.41939 |
| 3387.06+ | 0.27234 |

6 data points entered.

**X-int:** 4.09612

**Y-int:** -3.2573 +/- 0.43915

**m:** 0.79521 +/- 0.10846

**Dm:** 12477.3

**r:** 0.96475

Dose-Effect Curve

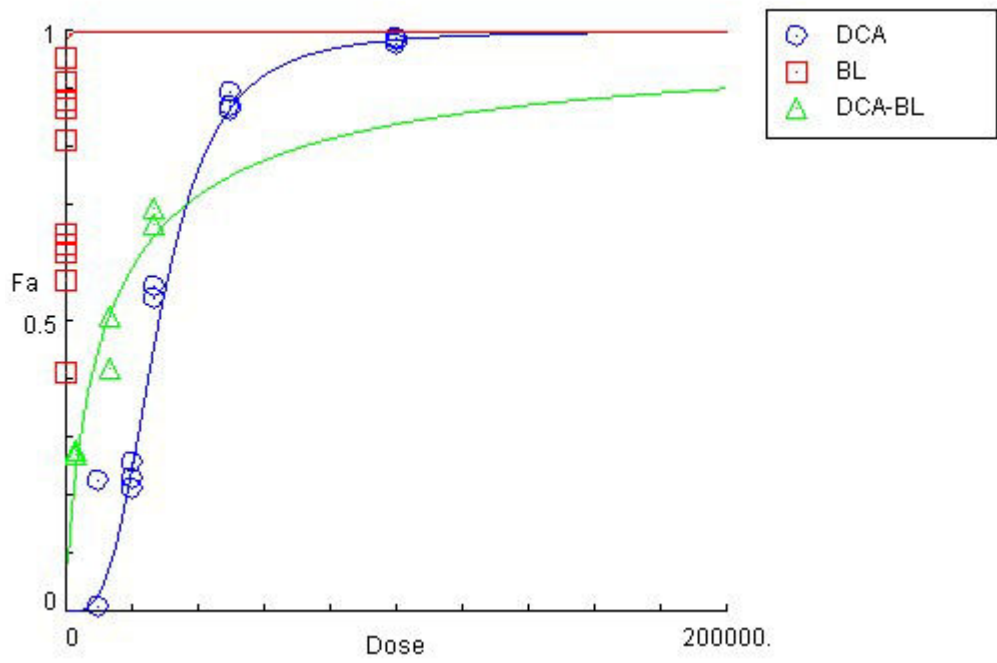

Median-Effect Plot



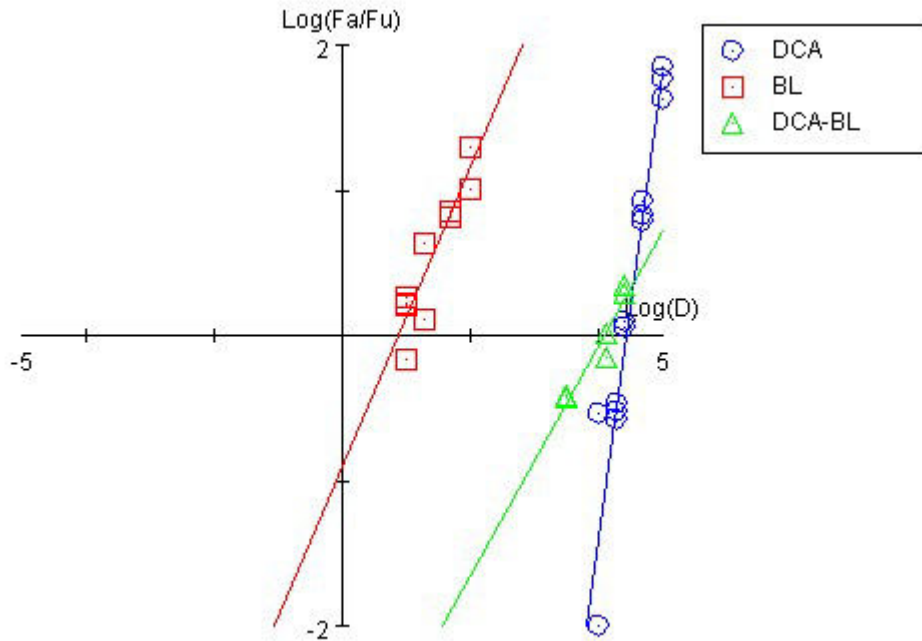

CI Data for Drug Combo: DCA-BL (DCA+BL [2645.88:1])

| Fa   | CI Value | S.D.A. Analysis     |
|------|----------|---------------------|
| 0.05 | 0.29008  | 0.29393 +/- 0.08218 |
| 0.1  | 0.38111  | 0.38465 +/- 0.08268 |
| 0.15 | 0.45790  | 0.46125 +/- 0.08144 |
| 0.2  | 0.53067  | 0.53389 +/- 0.07964 |
| 0.25 | 0.60361  | 0.60674 +/- 0.07770 |
| 0.3  | 0.67935  | 0.68244 +/- 0.07594 |
| 0.35 | 0.76012  | 0.76321 +/- 0.07471 |
| 0.4  | 0.84823  | 0.85137 +/- 0.07451 |
| 0.45 | 0.94639  | 0.94963 +/- 0.07606 |
| 0.5  | 1.05807  | 1.06148 +/- 0.08039 |
| 0.55 | 1.18808  | 1.19175 +/- 0.08882 |
| 0.6  | 1.34332  | 1.34738 +/- 0.10308 |
| 0.65 | 1.53442  | 1.53906 +/- 0.12549 |
| 0.7  | 1.77865  | 1.78416 +/- 0.15966 |
| 0.75 | 2.10650  | 2.11340 +/- 0.21215 |
| 0.8  | 2.57768  | 2.58689 +/- 0.29654 |
| 0.85 | 3.32824  | 3.34180 +/- 0.44595 |
| 0.9  | 4.75507  | 4.77859 +/- 0.76501 |
| 0.95 | 8.76699  | 8.82660 +/- 1.81792 |
| 0.97 | 13.8399  | 13.9565 +/- 3.35713 |

CI values for actual experimental points:

| Total Dose | Fa      | CI Value |
|------------|---------|----------|
| 27106.7    | 0.66694 | 1.46073  |
| 13553.4    | 0.50932 | 1.12019  |
| 3388.34    | 0.27877 | 0.58039  |
| 27106.7    | 0.69409 | 1.35391  |

| Total Dose | Fa      | CI Value |
|------------|---------|----------|
| 13553.4    | 0.41939 | 1.44708  |
| 3388.34    | 0.27234 | 0.59528  |

Combination Index Plot

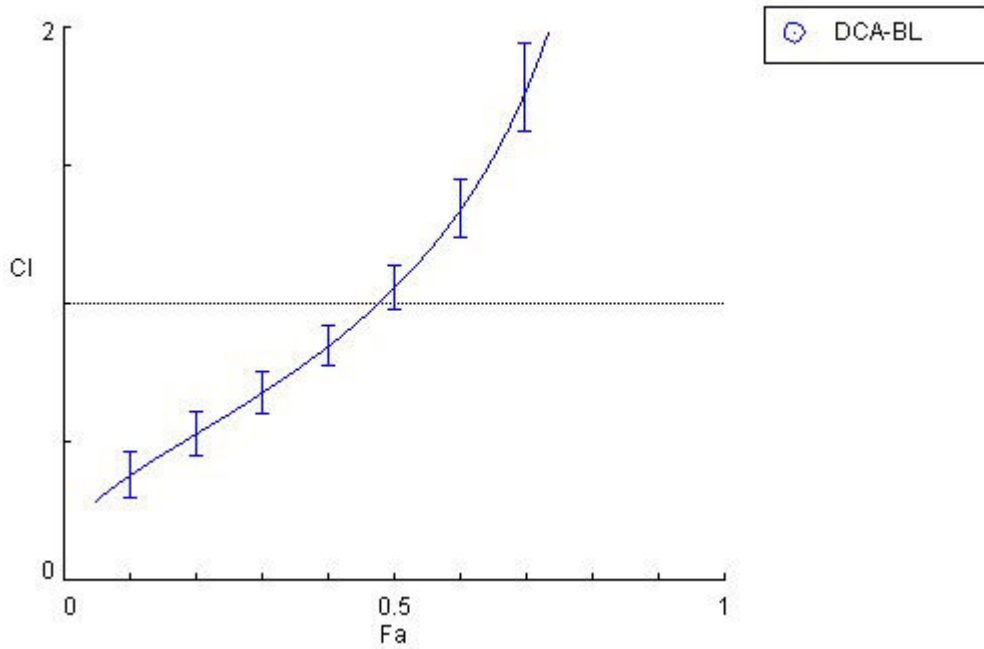

Logarithmic Combination Index Plot

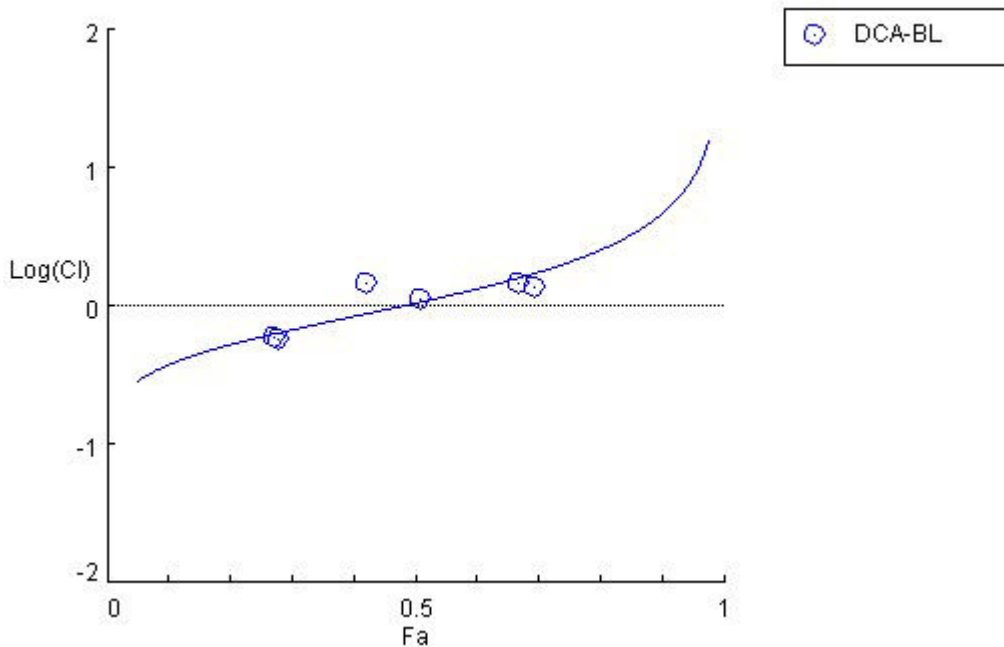

DRI Data for Drug Combo: DCA-BL (DCA+BL [2645.88:1])

| Fa   | Dose DCA | Dose BL | DRI DCA | DRI BL  |
|------|----------|---------|---------|---------|
| 0.05 | 11456.3  | 0.44153 | 37.2534 | 3.79887 |
| 0.1  | 14387.3  | 0.91124 | 18.2817 | 3.06365 |
| 0.15 | 16566.6  | 1.42709 | 11.7655 | 2.68165 |
| 0.2  | 18422.5  | 2.00046 | 8.44316 | 2.42581 |

| Fa   | Dose DCA | Dose BL | DRI DCA | DRI BL  |
|------|----------|---------|---------|---------|
| 0.25 | 20111.3  | 2.64411 | 6.41919 | 2.23301 |
| 0.3  | 21712.7  | 3.37375 | 5.05245 | 2.07717 |
| 0.35 | 23277.5  | 4.20957 | 4.06503 | 1.94507 |
| 0.4  | 24843.6  | 5.17819 | 3.31665 | 1.82908 |
| 0.45 | 26444.2  | 6.31569 | 2.72878 | 1.72437 |
| 0.5  | 28112.5  | 7.67233 | 2.25395 | 1.62758 |
| 0.55 | 29886.1  | 9.32038 | 1.86174 | 1.53622 |
| 0.6  | 31811.5  | 11.3678 | 1.53175 | 1.44828 |
| 0.65 | 33951.8  | 13.9835 | 1.24976 | 1.36192 |
| 0.7  | 36398.6  | 17.4478 | 1.00551 | 1.27530 |
| 0.75 | 39297.0  | 22.2626 | 0.79142 | 1.18630 |
| 0.8  | 42899.2  | 29.4255 | 0.60171 | 1.09201 |
| 0.85 | 47705.2  | 41.2480 | 0.43179 | 0.98783 |
| 0.9  | 54931.2  | 64.5985 | 0.27789 | 0.86466 |
| 0.95 | 68984.7  | 133.318 | 0.13637 | 0.69732 |
| 0.97 | 81123.4  | 223.245 | 0.08218 | 0.59836 |

DRI values calculated at experimental points

| Fa      | Dose DCA | Dose BL | DRI DCA | DRI BL  |
|---------|----------|---------|---------|---------|
| 0.66694 | 34740.6  | 15.0433 | 1.28211 | 1.46893 |
| 0.50932 | 28433.9  | 7.95478 | 2.09871 | 1.55351 |
| 0.27877 | 21039.8  | 3.05227 | 6.21180 | 2.38435 |
| 0.69409 | 36089.3  | 16.9807 | 1.33188 | 1.65811 |
| 0.41939 | 25458.3  | 5.59678 | 1.87908 | 1.09301 |
| 0.27234 | 20834.2  | 2.95841 | 6.15111 | 2.31103 |

DRI Plot for Combo: DCA-BL (DCA+BL [2645.88:1])

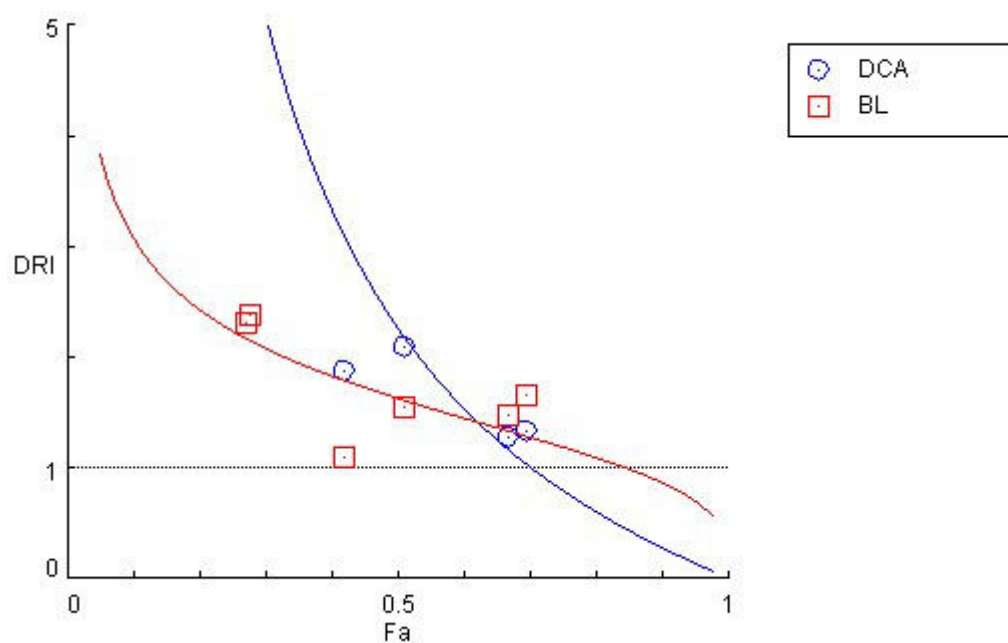

Log(DRI) Plot for Combo: DCA-BL (DCA+BL [2645.88:1])

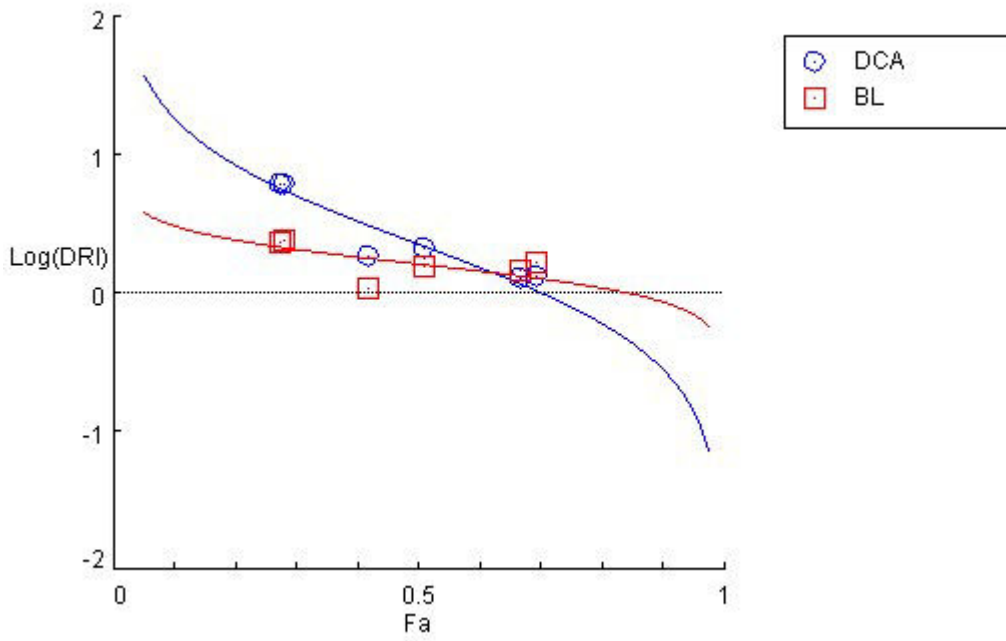

Isobologram for Combo: DCA-BL (DCA+BL [2645.88:1])

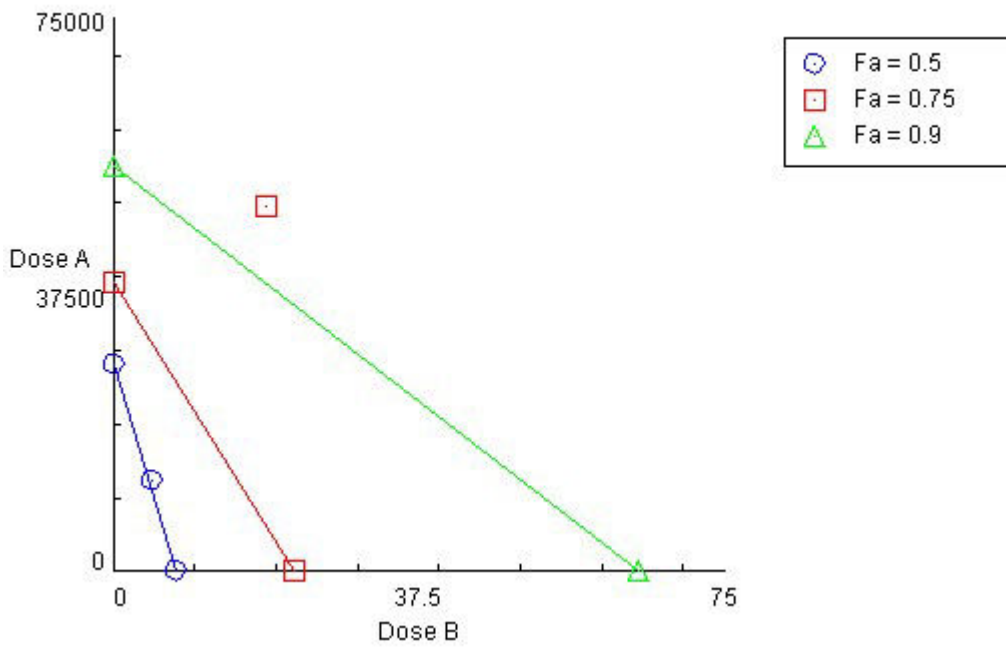

Polygonogram at Fa = 0.9

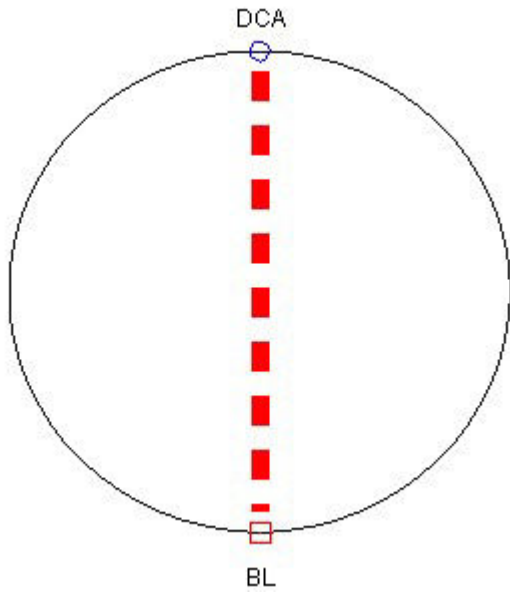

...Data for Drug: DON [uM]

| <b>Dose</b> | <b>Effect</b> |
|-------------|---------------|
| 100.0       | 0.38166       |
| 100.0       | 0.48012       |
| 100.0       | 0.48384       |
| 200.0       | 0.33739       |
| 200.0       | 0.36386       |
| 200.0       | 0.39423       |
| 500.0       | 0.40269       |
| 500.0       | 0.37869       |
| 500.0       | 0.36816       |
| 1000.0      | 0.46954       |
| 1000.0      | 0.44890       |
| 1000.0      | 0.35436       |
| 1505.33     | 0.43321       |
| 1505.33     | 0.46825       |

14 data points entered.

**X-int:** 10.4241

**Y-int:** -0.2083 +/- 0.15697

**m:** 0.01998 +/- 0.05965

**Dm:** 2.66E10

**r:** 0.09625

---

Data for Drug: BL [uM]

| <b>Dose</b> | <b>Effect</b> |
|-------------|---------------|
| 60.5        | 0.50542       |
| 10.0        | 0.17796       |
| 10.0        | 0.11899       |
| 20.0        | 0.29743       |
| 20.0        | 0.23117       |
| 50.0        | 0.50862       |
| 50.0        | 0.45673       |
| 100.0       | 0.67143       |
| 100.0       | 0.60417       |
| 60.5        | 0.60304       |

10 data points entered.

**X-int:** 1.73002

**Y-int:** -1.7977 +/- 0.12684

**m:** 1.03911 +/- 0.07942

**Dm:** 53.7054

**r:** 0.97742

---

Data for Drug Combo: DON-BL (DON+BL [24.8815:1])

| <b>Dose A</b> | <b>Effect</b> |
|---------------|---------------|
| 1505.33+      | 0.60379       |

| Dose A   | Effect  |
|----------|---------|
| 752.665+ | 0.5     |
| 188.166+ | 0.40584 |
| 1505.33+ | 0.63869 |
| 752.665+ | 0.53658 |
| 188.166+ | 0.39807 |

6 data points entered.

**X-int:** 2.73379

**Y-int:** -1.1387 +/- 0.13677

**m:** 0.41653 +/- 0.04852

**Dm:** 541.745

**r:** 0.97391

### Dose-Effect Curve

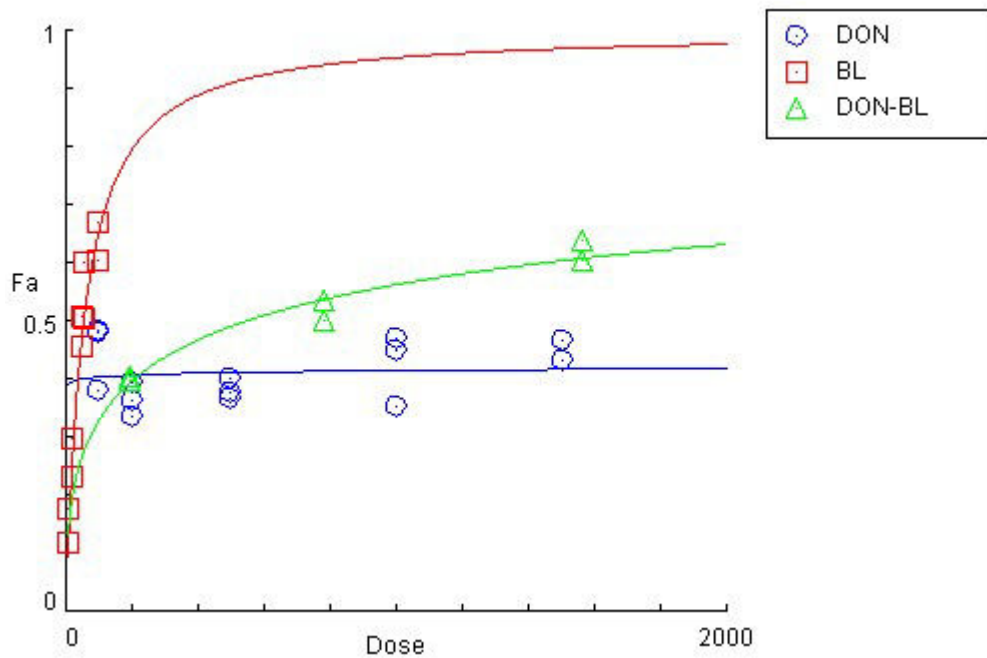

### Median-Effect Plot

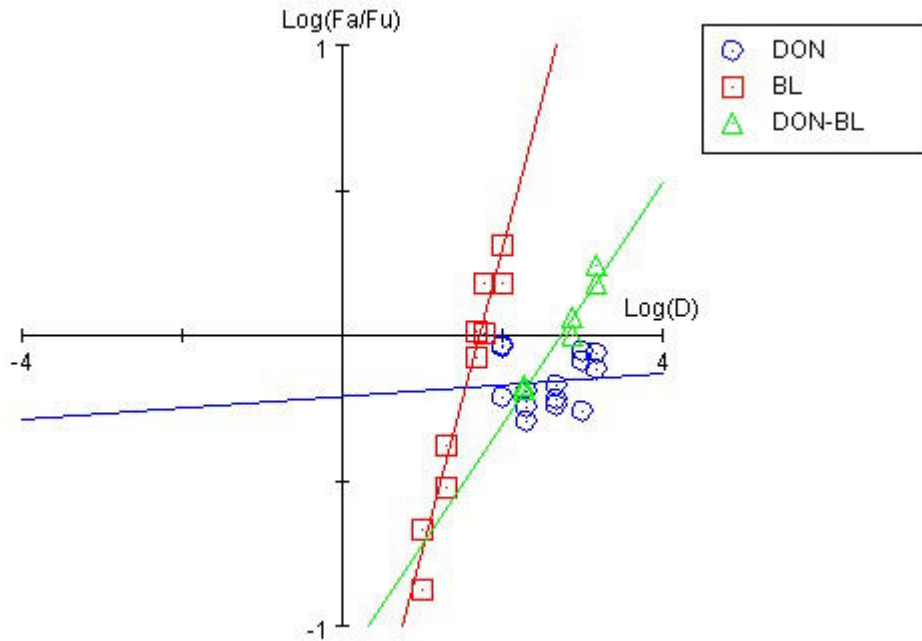

CI Data for Drug Combo: DON-BL (DON+BL [24.8815:1])

| Fa   | CI Value | S.D.A. Analysis     |
|------|----------|---------------------|
| 0.05 | 1.63E53  | Infinet +/- NaN     |
| 0.1  | 5.66E37  | Infinet +/- NaN     |
| 0.15 | 1.52E28  | 4.0E246 +/- Infinet |
| 0.2  | 9.43E20  | 6.4E182 +/- Infinet |
| 0.25 | 1.05E15  | 1.3E130 +/- 1.5E131 |
| 0.3  | 6.652E9  | 1.25E84 +/- 1.40E85 |
| 0.35 | 125991.  | 2.11E42 +/- 2.21E43 |
| 0.4  | 5.02079  | 5.930E8 +/- 6.677E9 |
| 0.45 | 0.29231  | 2.54E11 +/- 2.86E12 |
| 0.5  | 0.38975  | 1.91E26 +/- 2.15E27 |
| 0.55 | 0.52017  | 1.44E41 +/- 1.62E42 |
| 0.6  | 0.69837  | 2.19E56 +/- 2.46E57 |
| 0.65 | 0.94952  | 1.49E72 +/- 1.68E73 |
| 0.7  | 1.31856  | 1.24E89 +/- 1.40E90 |
| 0.75 | 1.89277  | 5.3E107 +/- 6.0E108 |
| 0.8  | 2.86295  | 1.1E129 +/- 1.3E130 |
| 0.85 | 4.72501  | 7.5E154 +/- Infinet |
| 0.9  | 9.19192  | 1.5E189 +/- Infinet |
| 0.95 | 26.9275  | 3.7E244 +/- Infinet |
| 0.97 | 57.8531  | 9.5E283 +/- Infinet |

CI values for actual experimental points:

| Total Dose | Fa      | CI Value |
|------------|---------|----------|
| 1565.83    | 0.60379 | 0.75104  |
| 782.915    | 0.5     | 0.56326  |
| 195.729    | 0.40584 | 1.56652  |
| 1565.83    | 0.63869 | 0.65108  |



| Total Dose | Fa      | CI Value |
|------------|---------|----------|
| 782.915    | 0.53658 | 0.48916  |
| 195.729    | 0.39807 | 7.08268  |

Combination Index Plot

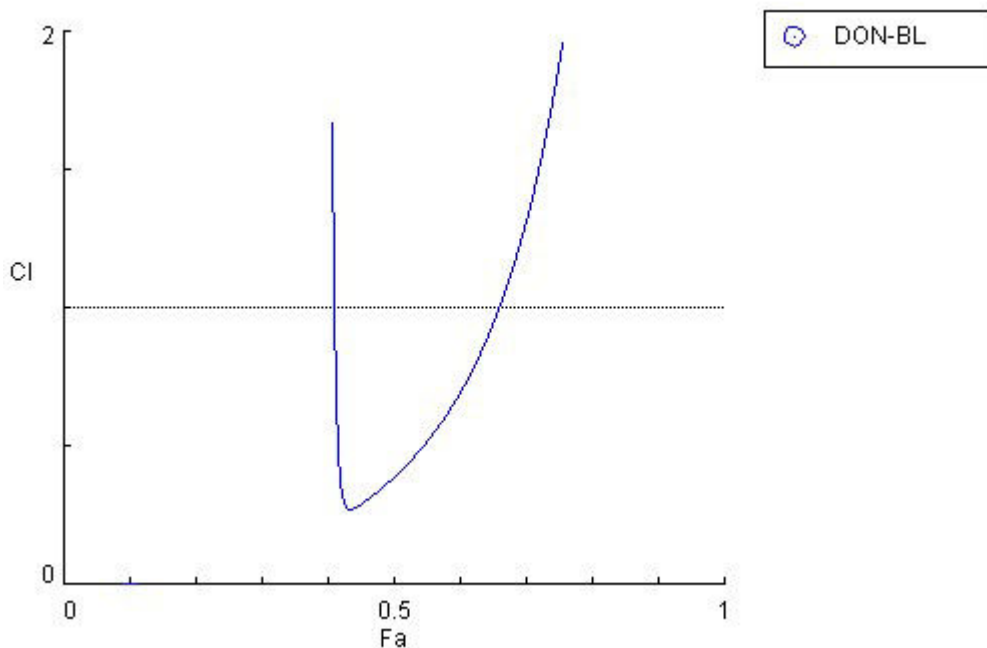

Logarithmic Combination Index Plot

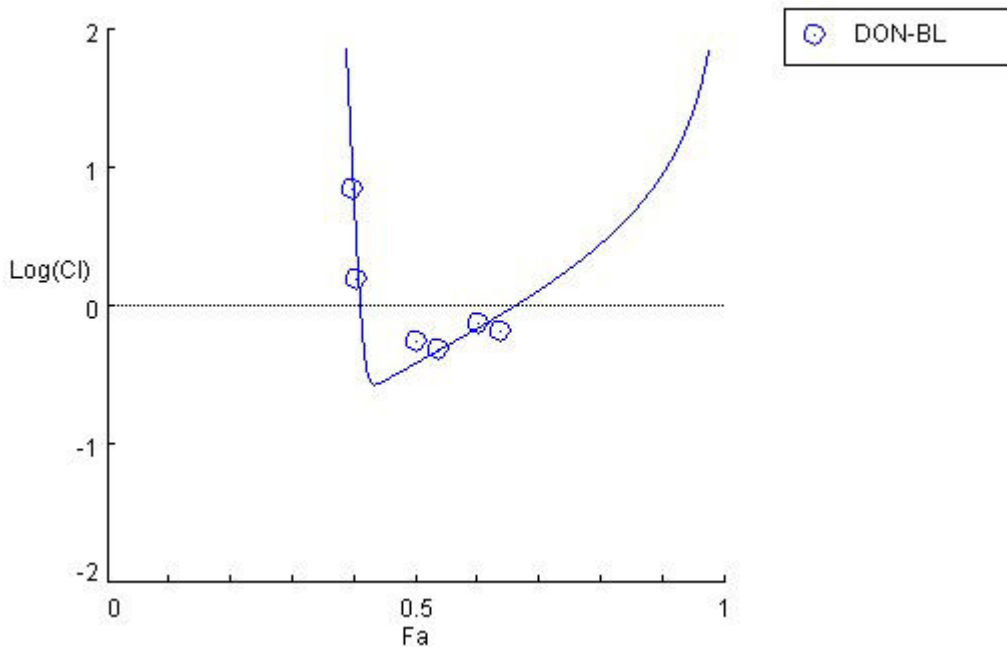

DRI Data for Drug Combo: DON-BL (DON+BL [24.8815:1])

| Fa   | Dose DON | Dose BL | DRI DON | DRI BL  |
|------|----------|---------|---------|---------|
| 0.05 | 2.7E-54  | 3.15786 | 6.1E-54 | 177.264 |
| 0.1  | 4.7E-38  | 6.48172 | 1.8E-38 | 60.5107 |
| 0.15 | 5.3E-28  | 10.1168 | 6.6E-29 | 31.1049 |
| 0.2  | 2.0E-20  | 14.1455 | 1.1E-21 | 18.8469 |

| Fa   | Dose DON | Dose BL | DRI DON | DRI BL  |
|------|----------|---------|---------|---------|
| 0.25 | 3.5E-14  | 18.6575 | 9.5E-16 | 12.4601 |
| 0.3  | 1.02E-8  | 23.7624 | 1.5E-10 | 8.68010 |
| 0.35 | 9.35E-4  | 29.6000 | 7.94E-6 | 6.25073 |
| 0.4  | 40.9623  | 36.3542 | 0.20819 | 4.59737 |
| 0.45 | 1156294  | 44.2739 | 3594.32 | 3.42431 |
| 0.5  | 2.66E10  | 53.7054 | 5.099E7 | 2.56574 |
| 0.55 | 6.10E14  | 65.1461 | 7.23E11 | 1.92244 |
| 0.6  | 1.72E19  | 79.3381 | 1.25E16 | 1.43191 |
| 0.65 | 7.54E23  | 97.4417 | 3.28E20 | 1.05316 |
| 0.7  | 6.89E28  | 121.379 | 1.73E25 | 0.75840 |
| 0.75 | 1.99E34  | 154.590 | 2.74E30 | 0.52833 |
| 0.8  | 3.56E40  | 203.900 | 2.45E36 | 0.34929 |
| 0.85 | 1.32E48  | 285.097 | 3.94E43 | 0.21164 |
| 0.9  | 1.50E58  | 444.985 | 1.47E53 | 0.10879 |
| 0.95 | 2.59E74  | 913.362 | 4.24E68 | 0.03714 |
| 0.97 | 9.30E85  | 1523.53 | 4.24E79 | 0.01729 |

DRI values calculated at experimental points

| Fa      | Dose DON | Dose BL | DRI DON | DRI BL  |
|---------|----------|---------|---------|---------|
| 0.60379 | 3.80E19  | 80.5550 | 2.52E16 | 1.33149 |
| 0.5     | 2.66E10  | 53.7054 | 3.528E7 | 1.77539 |
| 0.40584 | 138.022  | 37.2135 | 0.73351 | 4.92079 |
| 0.63869 | 6.38E22  | 92.9227 | 4.24E19 | 1.53591 |
| 0.53658 | 4.07E13  | 61.8409 | 5.40E10 | 2.04433 |
| 0.39807 | 27.3775  | 36.0736 | 0.14550 | 4.77005 |

DRI Plot for Combo: DON-BL (DON+BL [24.8815:1])

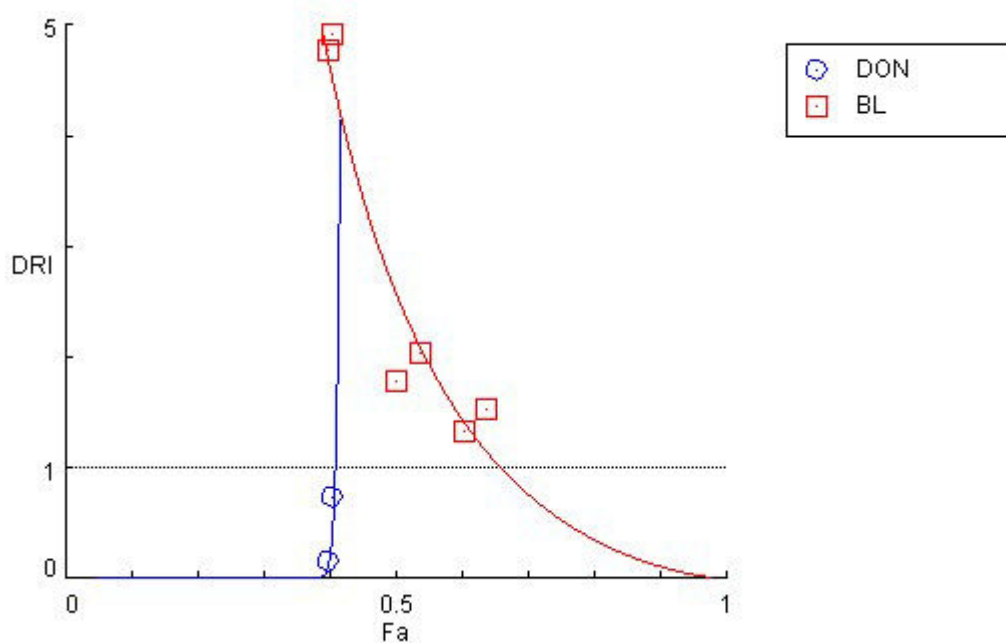

Log(DRI) Plot for Combo: DON-BL (DON+BL [24.8815:1])

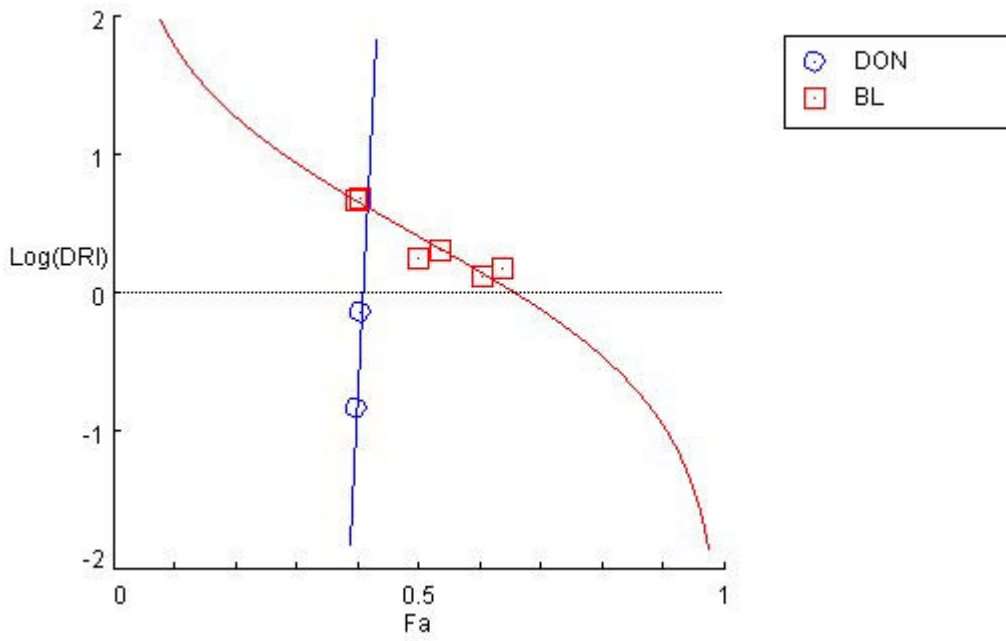

Isobologram for Combo: DON-BL (DON+BL [24.8815:1])

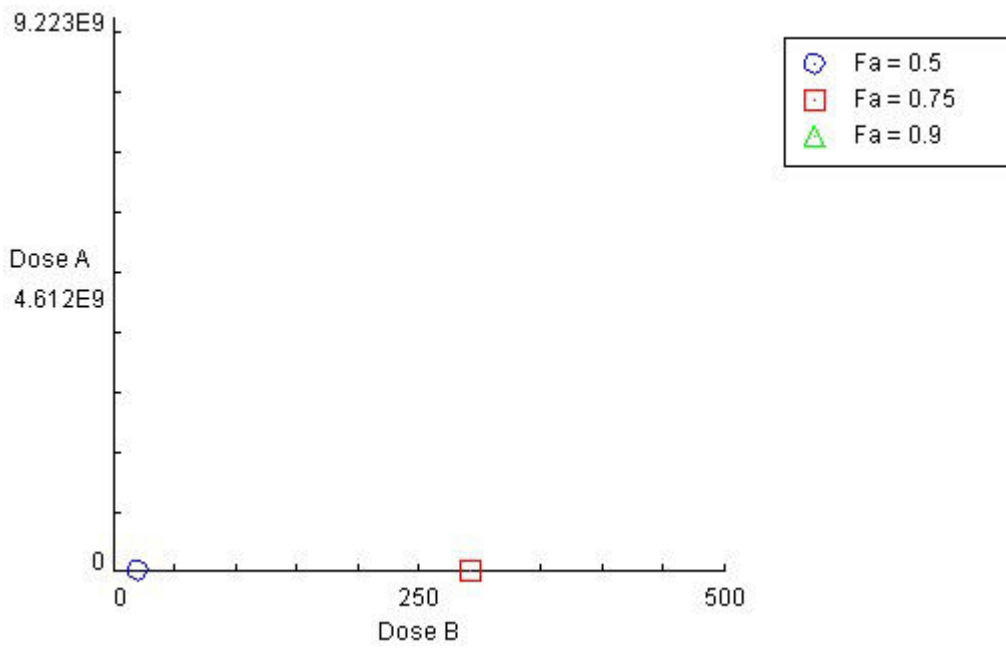

Polygonogram at Fa = 0.9

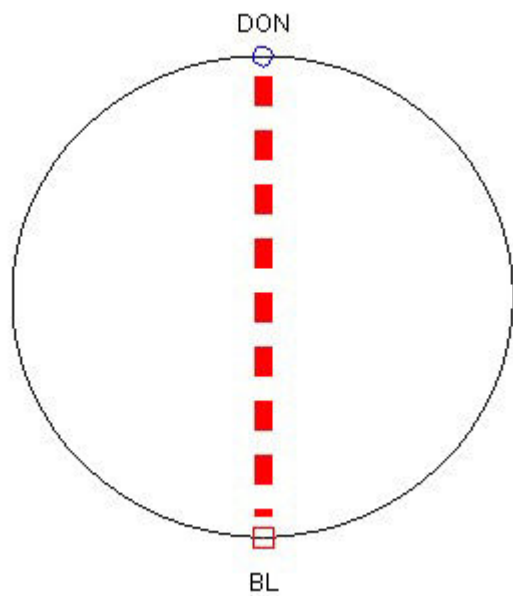

...Data for Drug: DON [uM]

| <b>Dose</b> | <b>Effect</b> |
|-------------|---------------|
| 100.0       | 0.47294       |
| 100.0       | 0.39925       |
| 100.0       | 0.47132       |
| 200.0       | 0.57530       |
| 200.0       | 0.52211       |
| 500.0       | 0.60422       |
| 500.0       | 0.63465       |
| 500.0       | 0.58732       |
| 200.0       | 0.53749       |
| 1000.0      | 0.68330       |
| 1000.0      | 0.62196       |
| 1000.0      | 0.59860       |
| 198.43      | 0.39312       |
| 198.43      | 0.27206       |

14 data points entered.

**X-int:** 2.35372

**Y-int:** -0.9248 +/- 0.27953

**m:** 0.39292 +/- 0.11194

**Dm:** 225.796

**r:** 0.71175

---

Data for Drug: BL [uM]

| <b>Dose</b> | <b>Effect</b> |
|-------------|---------------|
| 50.0        | 0.47634       |
| 50.0        | 0.54304       |
| 100.0       | 0.60608       |
| 100.0       | 0.64751       |
| 200.0       | 0.66695       |
| 200.0       | 0.70512       |
| 55.09       | 0.59058       |
| 55.09       | 0.57190       |

8 data points entered.

**X-int:** 1.54431

**Y-int:** -0.7160 +/- 0.18542

**m:** 0.46364 +/- 0.09508

**Dm:** 35.0196

**r:** 0.89360

---

Data for Drug Combo: DON-BL (DON+BL [3.6019:1])

| <b>Dose A</b> | <b>Effect</b> |
|---------------|---------------|
| 198.430+      | 0.56209       |
| 99.2149+      | 0.49428       |
| 24.8037+      | 0.33170       |

| Dose A   | Effect  |
|----------|---------|
| 198.430+ | 0.64855 |
| 99.2149+ | 0.53804 |
| 24.8037+ | 0.25181 |

6 data points entered.

**X-int:** 2.09208

**Y-int:** -1.3503 +/- 0.19487

**m:** 0.64542 +/- 0.09564

**Dm:** 123.619

**r:** 0.95878

Dose-Effect Curve

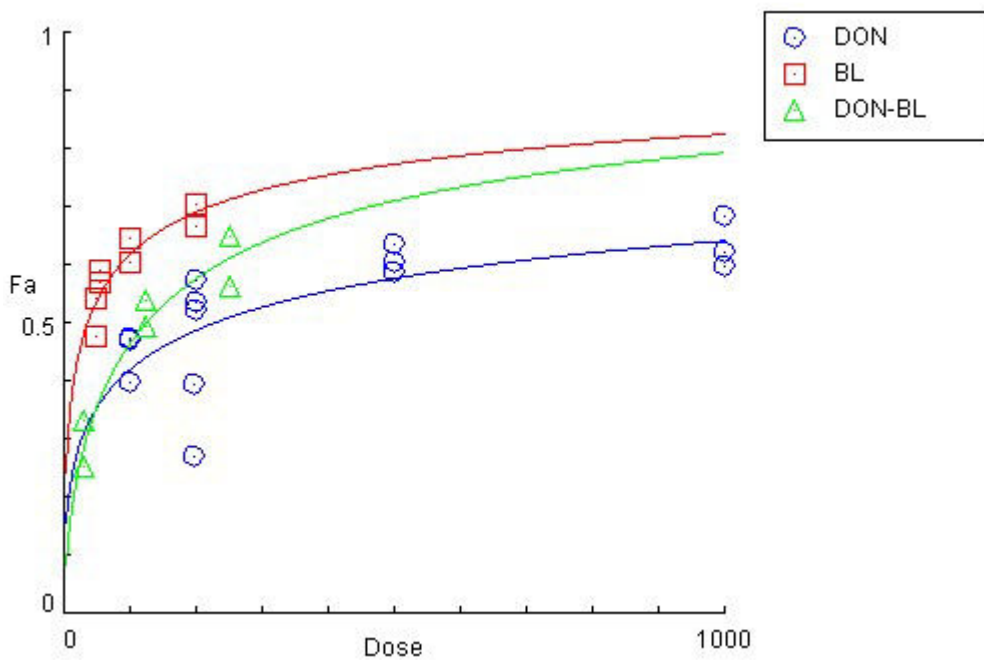

Median-Effect Plot

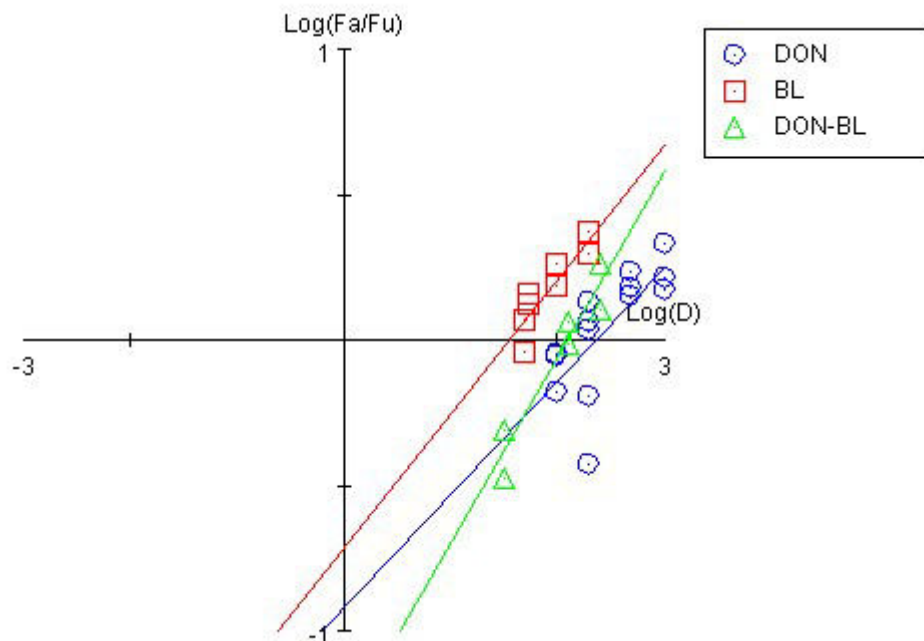

CI Data for Drug Combo: DON-BL (DON+BL [3.6019:1])

| <b>Fa</b> | <b>CI Value</b> | <b>S.D.A. Analysis</b> |
|-----------|-----------------|------------------------|
| 0.05      | 12.6254         | 13.8071 +/- 10.6875    |
| 0.1       | 6.73367         | 7.10759 +/- 4.09758    |
| 0.15      | 4.60996         | 4.78300 +/- 2.22014    |
| 0.2       | 3.48422         | 3.57694 +/- 1.37324    |
| 0.25      | 2.77443         | 2.82773 +/- 0.90551    |
| 0.3       | 2.27955         | 2.31125 +/- 0.61605    |
| 0.35      | 1.91089         | 1.92999 +/- 0.42385    |
| 0.4       | 1.62293         | 1.63447 +/- 0.29065    |
| 0.45      | 1.38979         | 1.39678 +/- 0.19673    |
| 0.5       | 1.19558         | 1.19992 +/- 0.13206    |
| 0.55      | 1.02995         | 1.03288 +/- 0.09302    |
| 0.6       | 0.88579         | 0.88817 +/- 0.07866    |
| 0.65      | 0.75802         | 0.76044 +/- 0.08222    |
| 0.7       | 0.64280         | 0.64568 +/- 0.09254    |
| 0.75      | 0.53709         | 0.54074 +/- 0.10279    |
| 0.8       | 0.43824         | 0.44289 +/- 0.11018    |
| 0.85      | 0.34364         | 0.34944 +/- 0.11337    |
| 0.9       | 0.25000         | 0.25701 +/- 0.11081    |
| 0.95      | 0.15110         | 0.15912 +/- 0.09848    |
| 0.97      | 0.10631         | 0.11445 +/- 0.08758    |

CI values for actual experimental points:

| <b>Total Dose</b> | <b>Fa</b> | <b>CI Value</b> |
|-------------------|-----------|-----------------|
| 253.52            | 0.56209   | 1.38368         |
| 126.76            | 0.49428   | 1.29209         |
| 31.69             | 0.33170   | 1.54415         |
| 253.52            | 0.64855   | 0.60444         |
| 126.76            | 0.53804   | 0.86422         |
| 31.69             | 0.25181   | 3.81488         |

Combination Index Plot

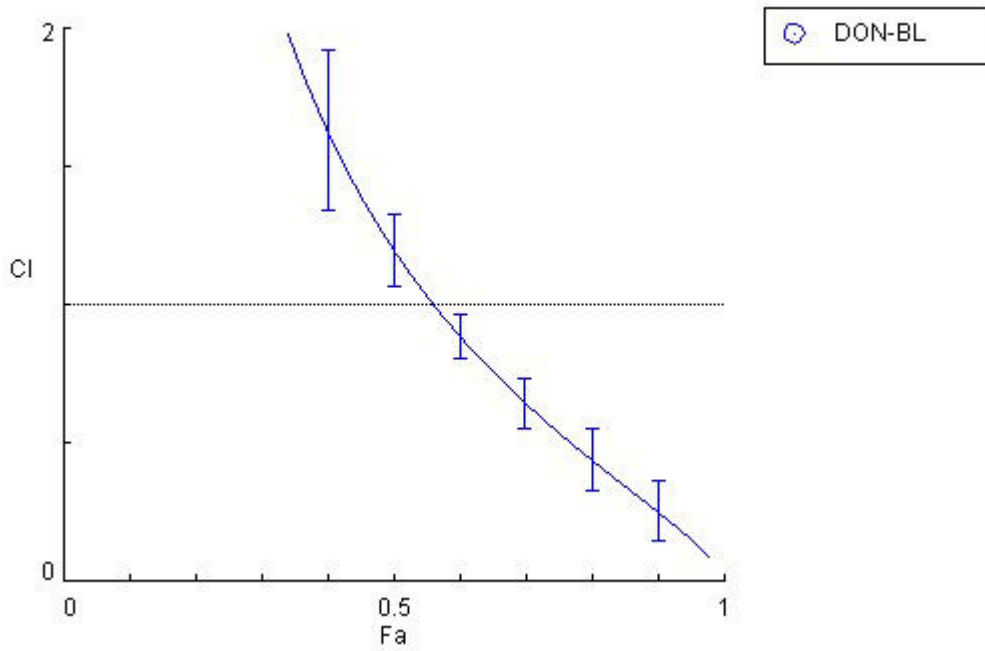

Logarithmic Combination Index Plot

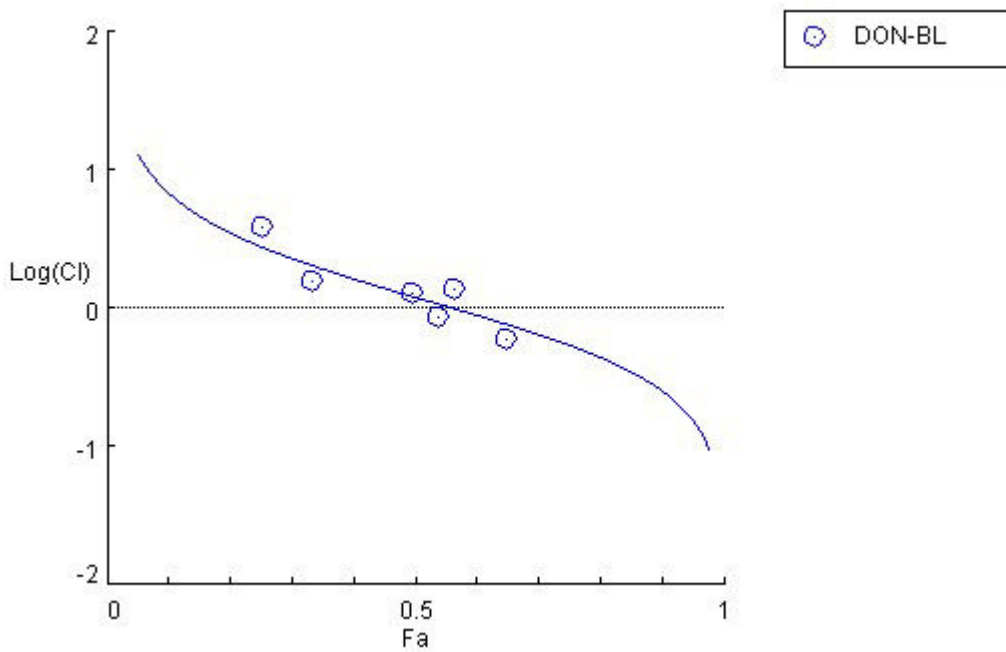

DRI Data for Drug Combo: DON-BL (DON+BL [3.6019:1])

| Fa   | Dose DON | Dose BL | DRI DON | DRI BL  |
|------|----------|---------|---------|---------|
| 0.05 | 0.12568  | 0.06113 | 0.12441 | 0.21797 |
| 0.1  | 0.84169  | 0.30632 | 0.26180 | 0.34318 |
| 0.15 | 2.73202  | 0.83084 | 0.41496 | 0.45453 |
| 0.2  | 6.62923  | 1.76106 | 0.58696 | 0.56163 |
| 0.25 | 13.7859  | 3.27525 | 0.78163 | 0.66887 |
| 0.3  | 26.1342  | 5.63184 | 1.00385 | 0.77919 |
| 0.35 | 46.7197  | 9.21424 | 1.25999 | 0.89507 |
| 0.4  | 80.4564  | 14.6054 | 1.55853 | 1.01906 |
| 0.45 | 135.493  | 22.7166 | 1.91103 | 1.15405 |



| Fa   | Dose DON | Dose BL | DRI DON | DRI BL  |
|------|----------|---------|---------|---------|
| 0.5  | 225.796  | 35.0196 | 2.33366 | 1.30366 |
| 0.55 | 376.283  | 53.9857 | 2.84975 | 1.47266 |
| 0.6  | 633.681  | 83.9671 | 3.49429 | 1.66774 |
| 0.65 | 1091.27  | 133.096 | 4.32223 | 1.89876 |
| 0.7  | 1950.85  | 217.757 | 5.42508 | 2.18116 |
| 0.75 | 3698.26  | 374.436 | 6.96744 | 2.54089 |
| 0.8  | 7690.75  | 696.384 | 9.27825 | 3.02606 |
| 0.85 | 18661.5  | 1476.07 | 13.1242 | 3.73907 |
| 0.9  | 60573.0  | 4003.54 | 20.8022 | 4.95230 |
| 0.95 | 405663.  | 20061.2 | 43.7726 | 7.79698 |
| 0.97 | 1569646  | 63148.2 | 74.3174 | 10.7692 |

DRI values calculated at experimental points

| Fa      | Dose DON | Dose BL | DRI DON | DRI BL  |
|---------|----------|---------|---------|---------|
| 0.56209 | 426.241  | 60.0015 | 2.14807 | 1.08915 |
| 0.49428 | 213.025  | 33.3336 | 2.14711 | 1.21015 |
| 0.33170 | 37.9710  | 7.72942 | 1.53086 | 1.12244 |
| 0.64855 | 1073.73  | 131.281 | 5.41116 | 2.38302 |
| 0.53804 | 332.841  | 48.6551 | 3.35475 | 1.76638 |
| 0.25181 | 14.1282  | 3.34406 | 0.56960 | 0.48561 |

DRI Plot for Combo: DON-BL (DON+BL [3.6019:1])

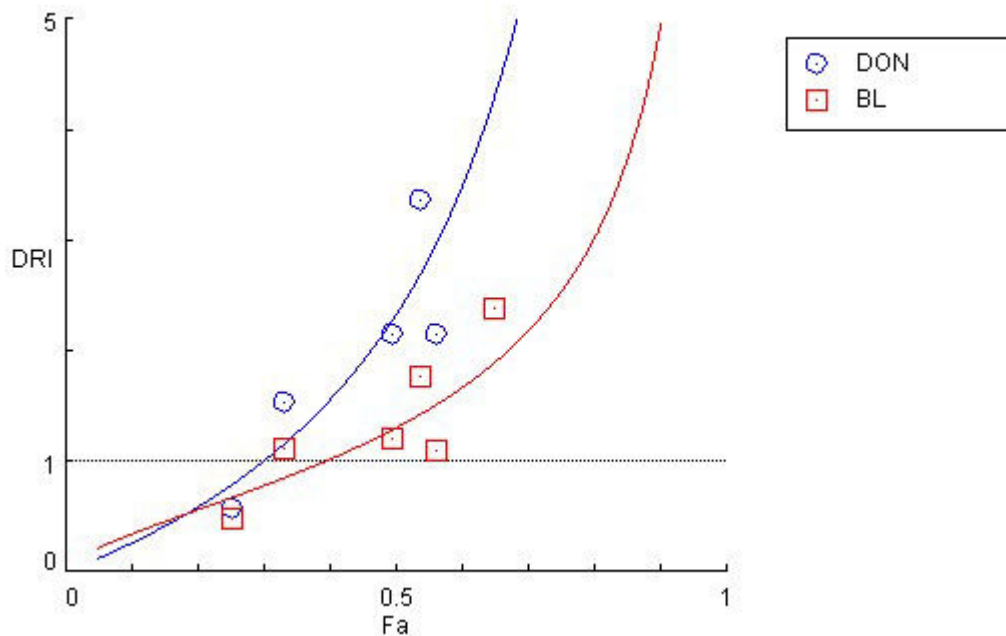

Log(DRI) Plot for Combo: DON-BL (DON+BL [3.6019:1])

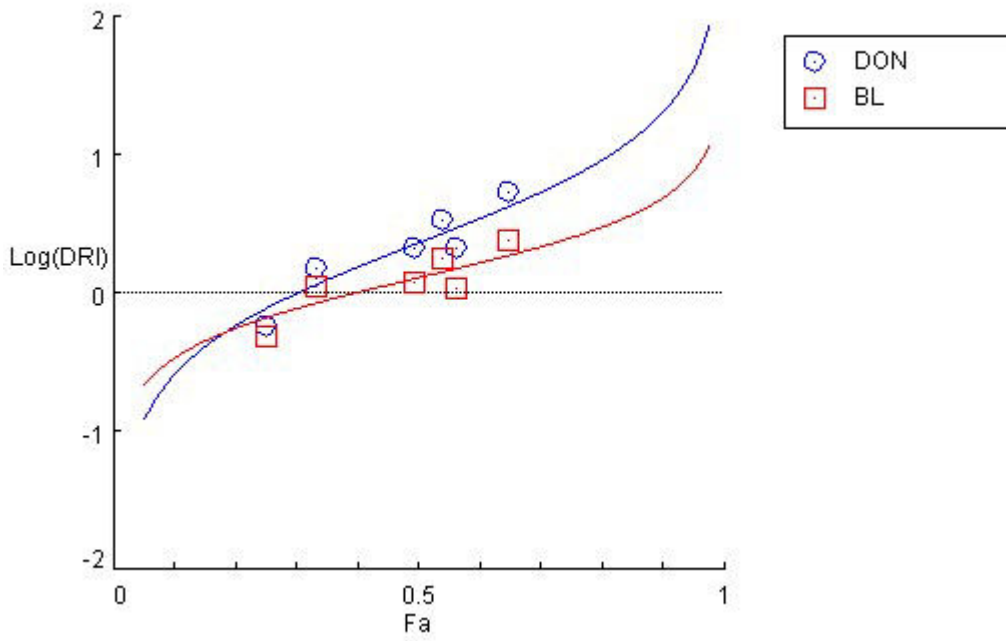

Isobologram for Combo: DON-BL (DON+BL [3.6019:1])

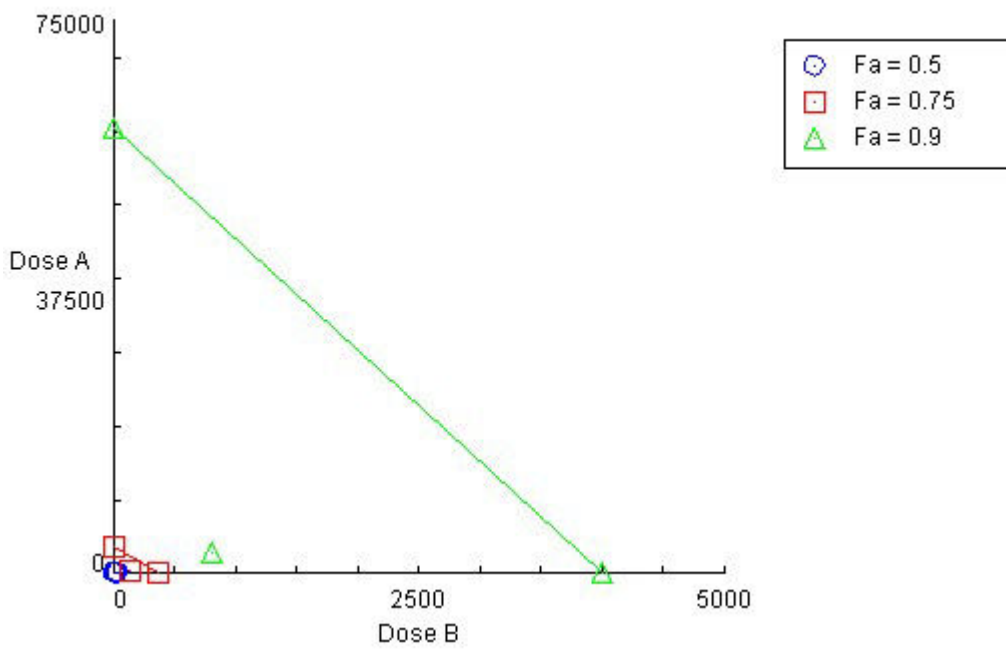

Polygonogram at Fa = 0.9

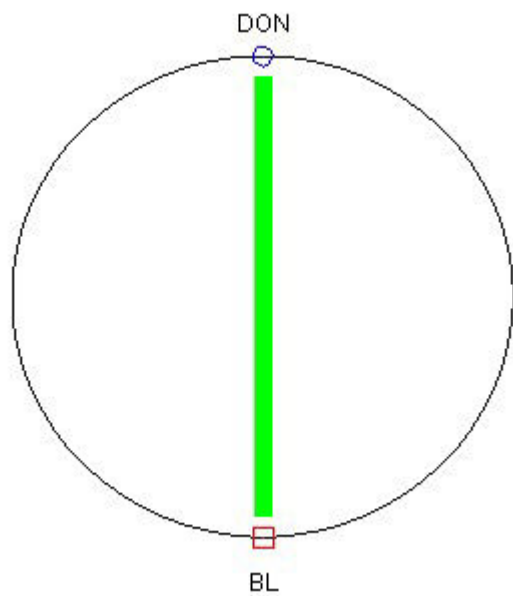

...Data for Drug: DON [uM]

| <b>Dose</b> | <b>Effect</b> |
|-------------|---------------|
| 100.0       | 0.23204       |
| 100.0       | 0.54701       |
| 100.0       | 0.56789       |
| 200.0       | 0.18821       |
| 200.0       | 0.50348       |
| 200.0       | 0.49454       |
| 500.0       | 0.26568       |
| 500.0       | 0.47313       |
| 500.0       | 0.51114       |
| 1000.0      | 0.42401       |
| 1000.0      | 0.46522       |
| 1000.0      | 0.55585       |
| 286.9       | 0.47474       |

13 data points entered.

**X-int:** 3.97260

**Y-int:** -0.3243 +/- 0.49090

**m:** 0.08164 +/- 0.19454

**Dm:** 9388.60

**r:** 0.12553

---

Data for Drug: BL [uM]

| <b>Dose</b> | <b>Effect</b> |
|-------------|---------------|
| 50.0        | 0.68241       |
| 50.0        | 0.29706       |
| 100.0       | 0.85466       |
| 100.0       | 0.59909       |
| 200.0       | 0.94684       |
| 200.0       | 0.79812       |
| 11.8        | 0.52598       |

7 data points entered.

**X-int:** 1.37768

**Y-int:** -1.1232 +/- 0.79223

**m:** 0.81526 +/- 0.41498

**Dm:** 23.8606

**r:** 0.66002

---

Data for Drug Combo: DON-BL (DON+BL [24.3135:1])

| <b>Dose A</b> | <b>Effect</b> |
|---------------|---------------|
| 286.900+      | 0.43644       |
| 143.450+      | 0.40651       |
| 24.8000+      | 0.45655       |

3 data points entered.

**X-int:** -0.3459

**Y-int:** -0.0171 +/- 0.13392

**m:** -0.0494 +/- 0.06471

**Dm:** 0.45091

**r:** -0.6072

### Dose-Effect Curve

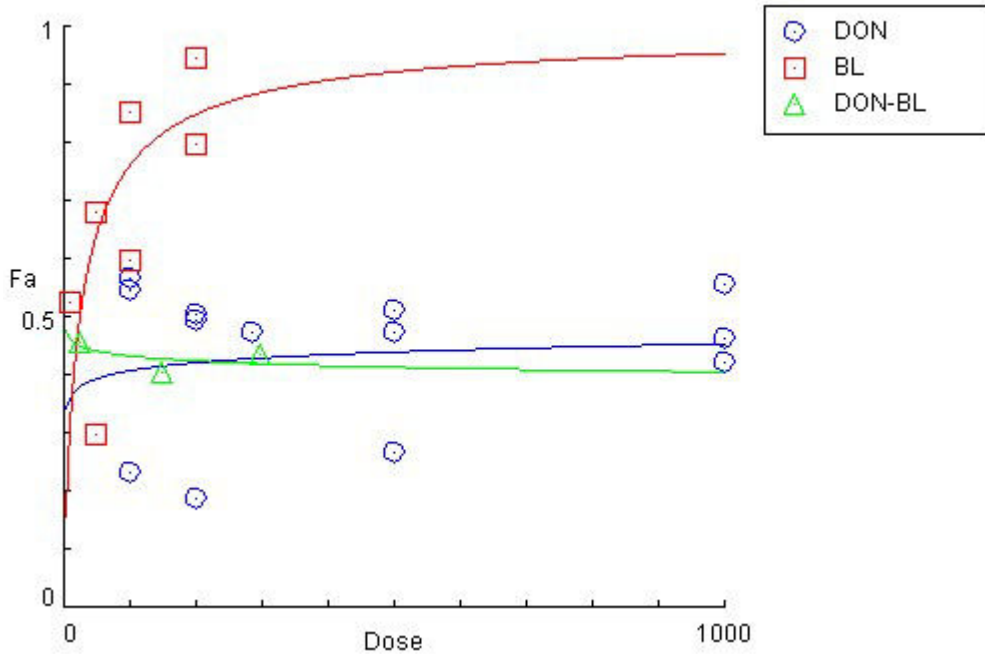

### Median-Effect Plot

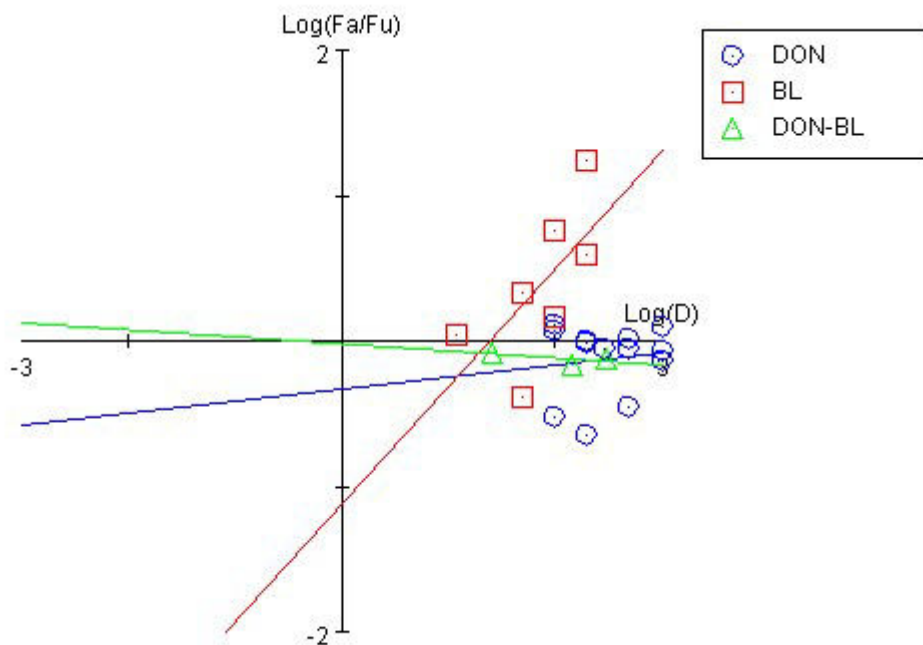

CI Data for Drug Combo: DON-BL (DON+BL [24.3135:1])

| Fa   | CI Value | S.D.A. Analysis     |
|------|----------|---------------------|
| 0.05 | 1.54E37  | 4.56E93 +/- 4.55E94 |
| 0.1  | 4.47E26  | 3.92E66 +/- 3.92E67 |
| 0.15 | 1.34E20  | 6.86E49 +/- 6.86E50 |

| Fa   | CI Value | S.D.A. Analysis     |
|------|----------|---------------------|
| 0.2  | 1.64E15  | 1.67E37 +/- 1.66E38 |
| 0.25 | 1.44E11  | 7.19E26 +/- 6.33E27 |
| 0.3  | 4.107E7  | 1.80E18 +/- 1.37E19 |
| 0.35 | 25207.1  | 1.03E11 +/- 9.99E11 |
| 0.4  | 28.5697  | 22169.6 +/- 220652. |
| 0.45 | 0.08645  | 0.15026 +/- 0.48830 |
| 0.5  | 7.93E-4  | 0.08943 +/- 0.85358 |
| 0.55 | 1.02E-5  | 0.19966 +/- 1.96620 |
| 0.6  | 1.25E-7  | 0.48640 +/- 4.83248 |
| 0.65 | 1.28E-9  | 1.24479 +/- 12.4122 |
| 0.7  | 9.5E-12  | 3.40836 +/- 34.0352 |
| 0.75 | 4.4E-14  | 10.3429 +/- 103.340 |
| 0.8  | 9.1E-17  | 36.8717 +/- 368.471 |
| 0.85 | 5.2E-20  | 171.851 +/- 1717.47 |
| 0.9  | 2.5E-24  | 1327.50 +/- 13267.1 |
| 0.95 | 2.8E-31  | 36067.7 +/- 360463. |
| 0.97 | 3.1E-36  | 378009. +/- 3777852 |

CI values for actual experimental points:

| Total Dose | Fa      | CI Value |
|------------|---------|----------|
| 298.7      | 0.43644 | 1.37645  |
| 149.35     | 0.40651 | 1.96734  |
| 25.82      | 0.45655 | 0.07526  |

Combination Index Plot

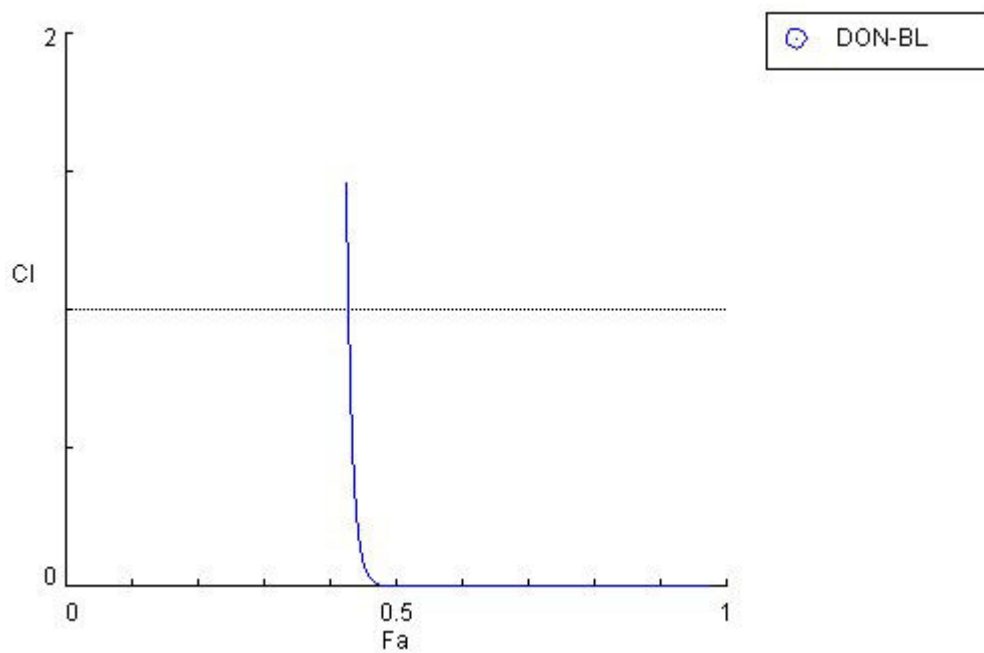

Logarithmic Combination Index Plot

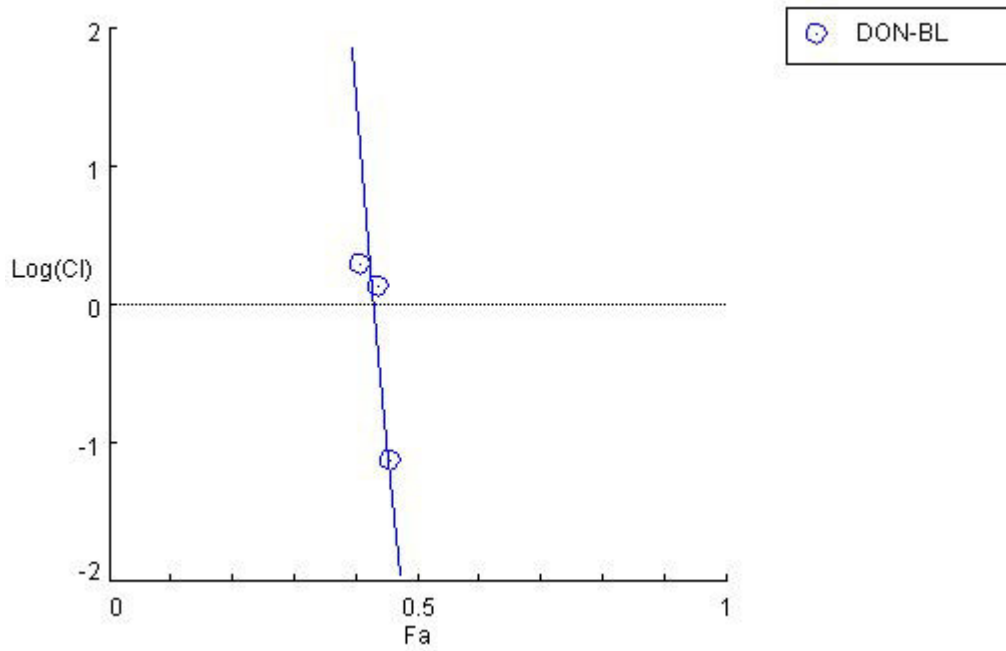

DRI Data for Drug Combo: DON-BL (DON+BL [24.3135:1])

| Fa   | Dose DON | Dose BL | DRI DON | DRI BL  |
|------|----------|---------|---------|---------|
| 0.05 | 2.0E-12  | 0.64440 | 6.5E-38 | 5.0E-25 |
| 0.1  | 1.93E-8  | 1.61139 | 2.2E-27 | 4.6E-18 |
| 0.15 | 5.56E-6  | 2.84214 | 7.5E-21 | 9.3E-14 |
| 0.2  | 3.97E-4  | 4.35703 | 6.1E-16 | 1.6E-10 |
| 0.25 | 0.01345  | 6.20071 | 7.0E-12 | 7.81E-8 |
| 0.3  | 0.29203  | 8.43954 | 2.44E-8 | 1.71E-5 |
| 0.35 | 4.78232  | 11.1664 | 4.04E-5 | 0.00229 |
| 0.4  | 65.4245  | 14.5106 | 0.04149 | 0.22375 |
| 0.45 | 803.783  | 18.6544 | 32.0681 | 18.0953 |
| 0.5  | 9388.60  | 23.8606 | 21677.9 | 1339.51 |
| 0.55 | 109664.  | 30.5197 | 1.465E7 | 99157.8 |
| 0.6  | 1347291  | 39.2352 | 1.13E10 | 8019048 |
| 0.65 | 1.843E7  | 50.9857 | 1.16E13 | 7.829E8 |
| 0.7  | 3.018E8  | 67.4596 | 1.93E16 | 1.05E11 |
| 0.75 | 6.556E9  | 91.8165 | 6.75E19 | 2.30E13 |
| 0.8  | 2.22E11  | 130.669 | 7.69E23 | 1.10E16 |
| 0.85 | 1.58E13  | 200.317 | 6.28E28 | 1.93E19 |
| 0.9  | 4.58E15  | 353.314 | 2.10E35 | 3.94E23 |
| 0.95 | 4.32E19  | 883.502 | 7.24E45 | 3.60E30 |
| 0.97 | 2.91E22  | 1696.01 | 2.28E53 | 3.23E35 |

DRI values calculated at experimental points

| Fa      | Dose DON | Dose BL | DRI DON | DRI BL  |
|---------|----------|---------|---------|---------|
| 0.43644 | 409.988  | 17.4383 | 1.42903 | 1.47782 |
| 0.40651 | 91.1361  | 15.0004 | 0.63532 | 2.54243 |
| 0.45655 | 1110.94  | 19.2689 | 44.7960 | 18.8909 |

DRI Plot for Combo: DON-BL (DON+BL [24.3135:1])

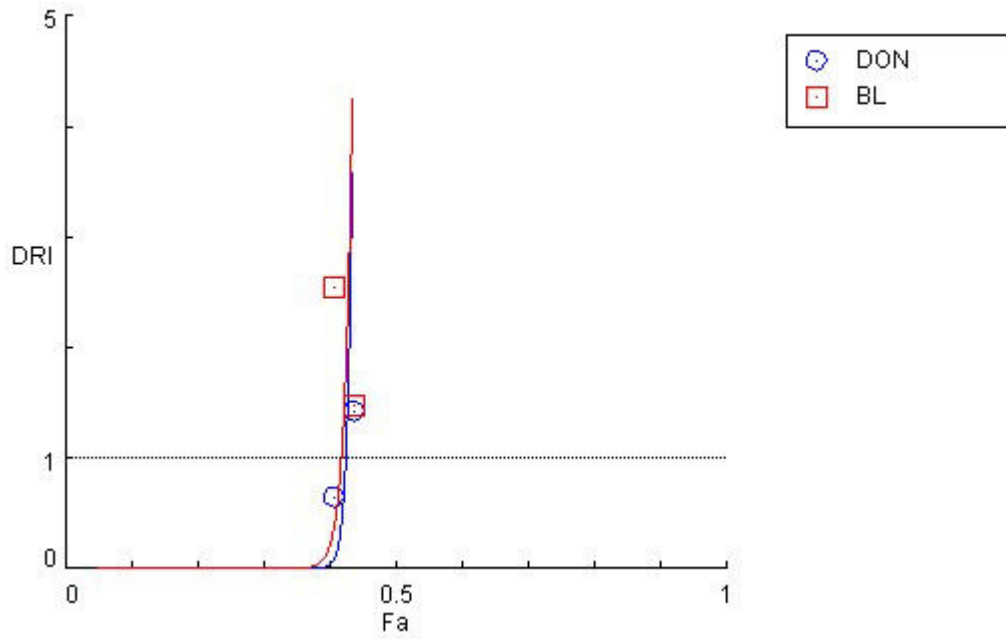

Log(DRI) Plot for Combo: DON-BL (DON+BL [24.3135:1])

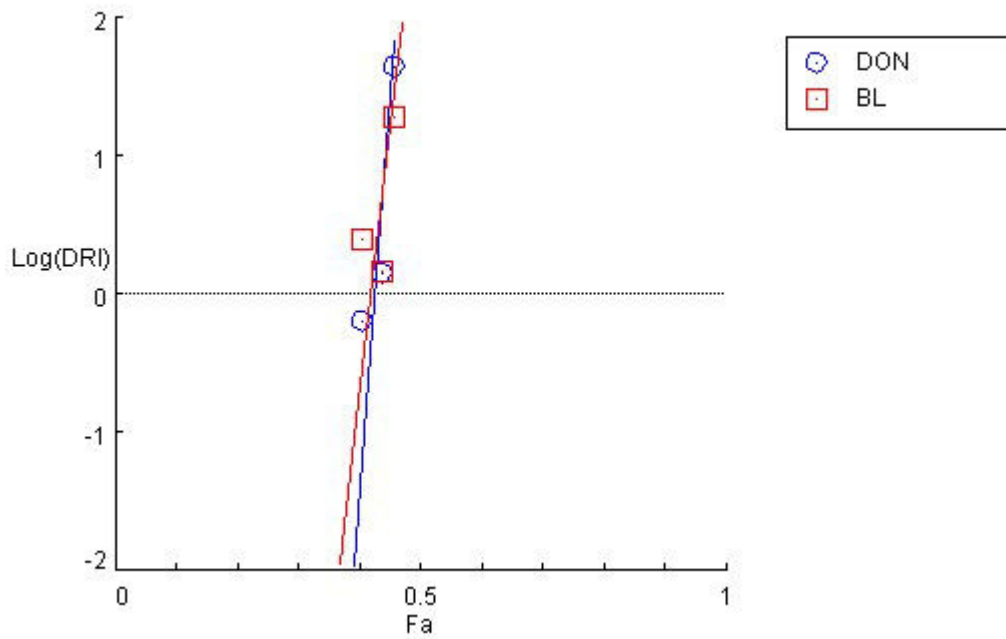

Isobologram for Combo: DON-BL (DON+BL [24.3135:1])



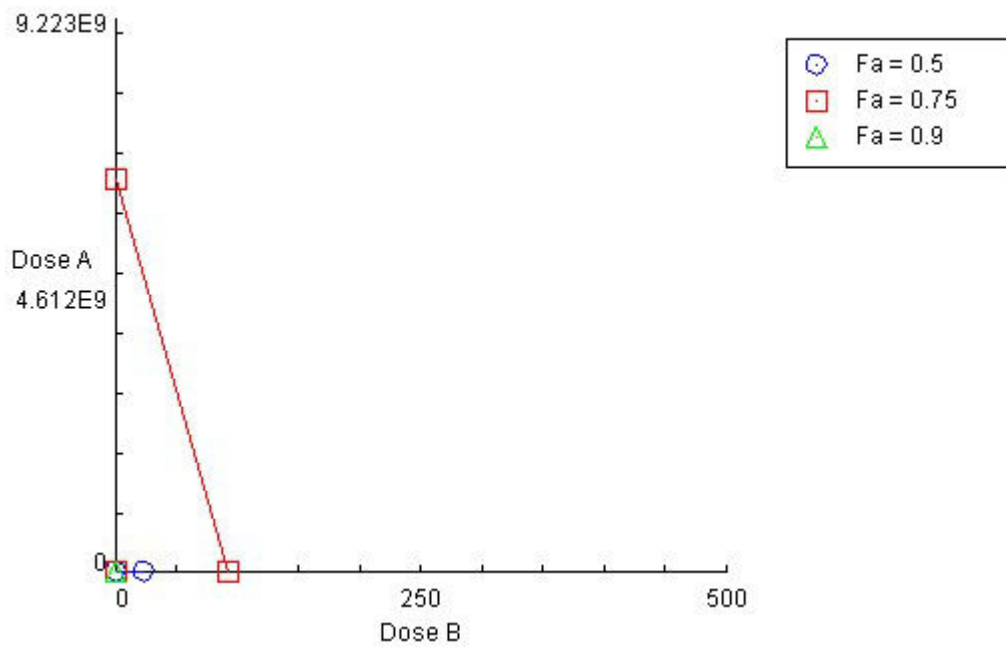

Polygonogram at  $Fa = 0.9$

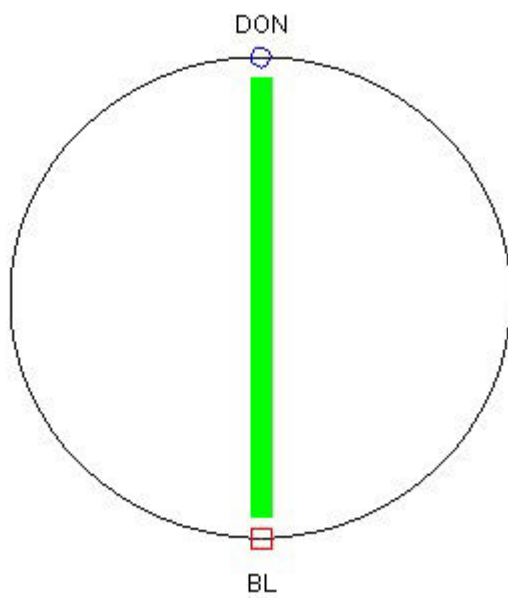

...Data for Drug: DON [uM]

| <b>Dose</b> | <b>Effect</b> |
|-------------|---------------|
| 100.0       | 0.59454       |
| 100.0       | 0.58923       |
| 100.0       | 0.63559       |
| 200.0       | 0.60940       |
| 200.0       | 0.61601       |
| 200.0       | 0.62264       |
| 500.0       | 0.60916       |
| 500.0       | 0.66858       |
| 500.0       | 0.64914       |
| 1000.0      | 0.62546       |
| 1000.0      | 0.68916       |
| 1000.0      | 0.67231       |
| 99.7        | 0.57481       |
| 99.7        | 0.60437       |

14 data points entered.

**X-int:** 0.51841

**Y-int:** -0.0609 +/- 0.07125

**m:** 0.11745 +/- 0.02896

**Dm:** 3.29925

**r:** 0.76034

---

Data for Drug: BL [uM]

| <b>Dose</b> | <b>Effect</b> |
|-------------|---------------|
| 10.0        | 0.63176       |
| 10.0        | 0.41297       |
| 20.0        | 0.81331       |
| 20.0        | 0.56917       |
| 50.0        | 0.86886       |
| 50.0        | 0.88044       |
| 100.0       | 0.91241       |
| 100.0       | 0.95258       |
| 10.24       | 0.68528       |
| 10.24       | 0.63144       |

10 data points entered.

**X-int:** 0.86442

**Y-int:** -0.8718 +/- 0.23487

**m:** 1.00857 +/- 0.16131

**Dm:** 7.31840

**r:** 0.91111

---

Data for Drug Combo: DON-BL (DON+BL [9.7363:1])

| <b>Dose A</b> | <b>Effect</b> |
|---------------|---------------|
| 99.7000+      | 0.83571       |

| Dose A   | Effect  |
|----------|---------|
| 49.8500+ | 0.7925  |
| 12.4625+ | 0.45699 |
| 99.7000+ | 0.83863 |
| 49.8500+ | 0.75690 |
| 12.4625+ | 0.50078 |

6 data points entered.

**X-int:** 1.16233

**Y-int:** -0.9834 +/- 0.10928

**m:** 0.84610 +/- 0.06496

**Dm:** 14.5320

**r:** 0.98841

Dose-Effect Curve

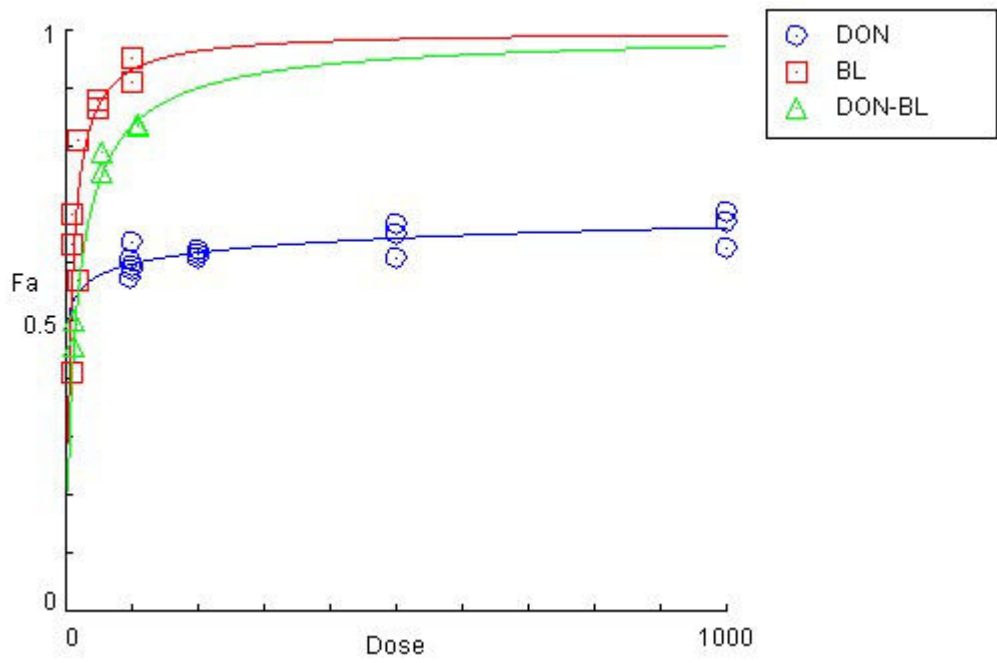

Median-Effect Plot

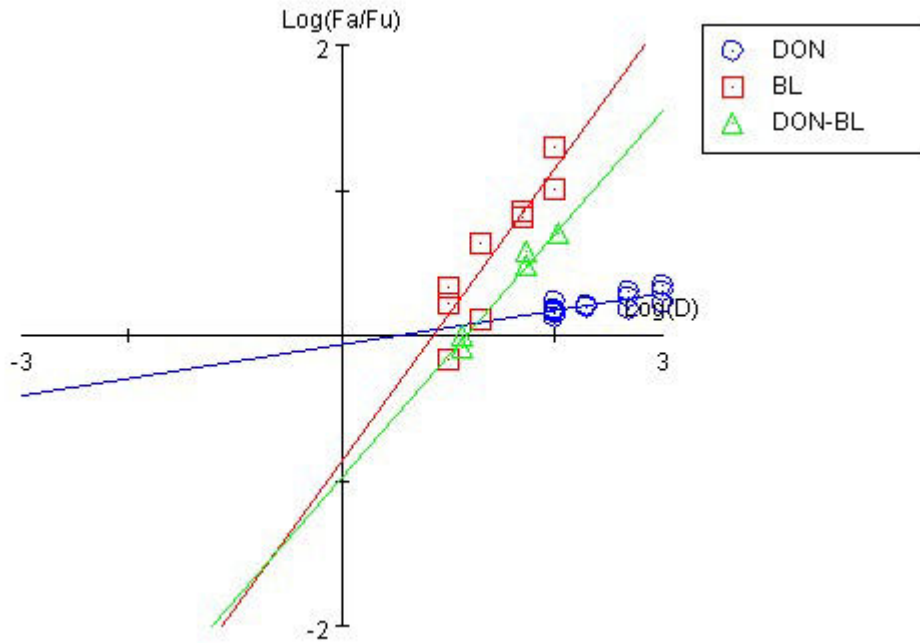

CI Data for Drug Combo: DON-BL (DON+BL [9.7363:1])

| Fa   | CI Value | S.D.A. Analysis     |
|------|----------|---------------------|
| 0.05 | 9.493E9  | 7.79E10 +/- 6.85E11 |
| 0.1  | 3.963E7  | 1.332E8 +/- 8.722E8 |
| 0.15 | 1333321  | 2912305 +/- 1.401E7 |
| 0.2  | 103711.  | 175919. +/- 621719. |
| 0.25 | 12582.4  | 18123.3 +/- 47210.6 |
| 0.3  | 1993.12  | 2565.61 +/- 4931.21 |
| 0.35 | 373.978  | 444.183 +/- 627.182 |
| 0.4  | 78.2570  | 87.6137 +/- 89.5961 |
| 0.45 | 17.5739  | 18.8281 +/- 13.4676 |
| 0.5  | 4.17934  | 4.33352 +/- 1.98537 |
| 0.55 | 1.10934  | 1.12417 +/- 0.25730 |
| 0.6  | 0.40412  | 0.40488 +/- 0.03133 |
| 0.65 | 0.25077  | 0.25087 +/- 0.01965 |
| 0.7  | 0.22533  | 0.22548 +/- 0.01684 |
| 0.75 | 0.22925  | 0.22932 +/- 0.01539 |
| 0.8  | 0.24097  | 0.24097 +/- 0.01513 |
| 0.85 | 0.25733  | 0.25729 +/- 0.01702 |
| 0.9  | 0.28101  | 0.28098 +/- 0.02326 |
| 0.95 | 0.32397  | 0.32415 +/- 0.04014 |
| 0.97 | 0.35848  | 0.35900 +/- 0.05642 |

CI values for actual experimental points:

| Total Dose | Fa      | CI Value |
|------------|---------|----------|
| 109.94     | 0.83571 | 0.27892  |
| 54.97      | 0.7925  | 0.18544  |
| 13.7425    | 0.45699 | 16.6096  |
| 109.94     | 0.83863 | 0.27307  |

| Total Dose | Fa      | CI Value |
|------------|---------|----------|
| 54.97      | 0.75690 | 0.22784  |
| 13.7425    | 0.50078 | 3.85261  |

Combination Index Plot

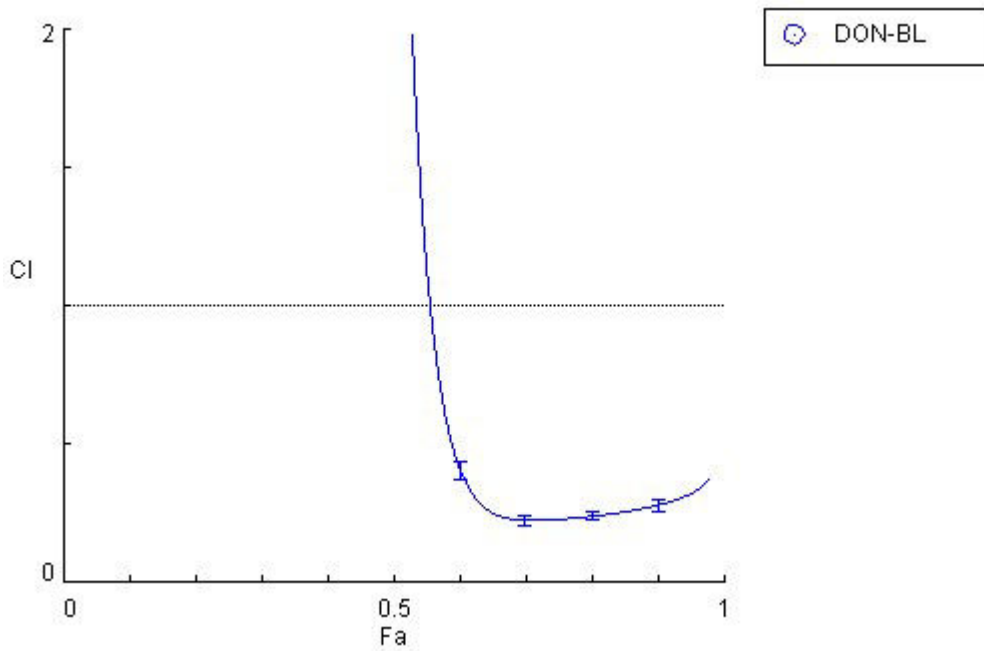

Logarithmic Combination Index Plot

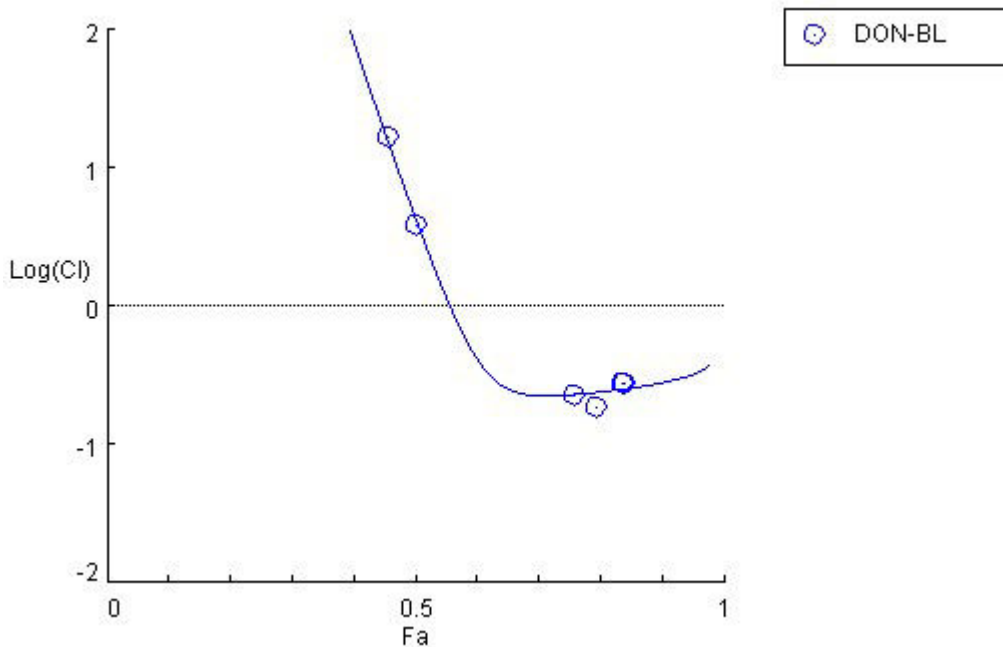

DRI Data for Drug Combo: DON-BL (DON+BL [9.7363:1])

| Fa   | Dose DON | Dose BL | DRI DON | DRI BL  |
|------|----------|---------|---------|---------|
| 0.05 | 4.3E-11  | 0.39493 | 1.1E-10 | 9.47106 |
| 0.1  | 2.48E-8  | 0.82847 | 2.52E-8 | 8.21517 |
| 0.15 | 1.27E-6  | 1.31065 | 7.50E-7 | 7.52256 |
| 0.2  | 2.47E-5  | 1.85127 | 9.64E-6 | 7.03991 |

| Fa   | Dose DON | Dose BL | DRI DON | DRI BL  |
|------|----------|---------|---------|---------|
| 0.25 | 2.86E-4  | 2.46234 | 7.95E-5 | 6.66470 |
| 0.3  | 0.00243  | 3.15911 | 5.02E-4 | 6.35333 |
| 0.35 | 0.01696  | 3.96145 | 0.00268 | 6.08315 |
| 0.4  | 0.10451  | 4.89576 | 0.01281 | 5.84076 |
| 0.45 | 0.59761  | 5.99799 | 0.05748 | 5.61741 |
| 0.5  | 3.29925  | 7.31840 | 0.25035 | 5.40685 |
| 0.55 | 18.2143  | 8.92947 | 1.09030 | 5.20418 |
| 0.6  | 104.149  | 10.9399 | 4.89407 | 5.00518 |
| 0.65 | 641.748  | 13.5200 | 23.4290 | 4.80574 |
| 0.7  | 4480.95  | 16.9538 | 124.910 | 4.60137 |
| 0.75 | 38073.8  | 21.7513 | 788.600 | 4.38640 |
| 0.8  | 440916.  | 28.9309 | 6500.12 | 4.15262 |
| 0.85 | 8555568  | 40.8643 | 83566.7 | 3.88618 |
| 0.9  | 4.394E8  | 64.6476 | 2484070 | 3.55854 |
| 0.95 | 2.55E11  | 135.615 | 5.950E8 | 3.08667 |
| 0.97 | 2.35E13  | 229.743 | 2.93E10 | 2.78953 |

DRI values calculated at experimental points

| Fa      | Dose DON | Dose BL | DRI DON | DRI BL  |
|---------|----------|---------|---------|---------|
| 0.83571 | 3412598  | 36.7164 | 34228.7 | 3.58557 |
| 0.7925  | 297443.  | 27.6346 | 5966.77 | 5.39737 |
| 0.45699 | 0.75981  | 6.16809 | 0.06097 | 4.81881 |
| 0.83863 | 4094255  | 37.5033 | 41065.8 | 3.66243 |
| 0.75690 | 52230.7  | 22.5670 | 1047.76 | 4.40760 |
| 0.50078 | 3.38816  | 7.34110 | 0.27187 | 5.73522 |

DRI Plot for Combo: DON-BL (DON+BL [9.7363:1])

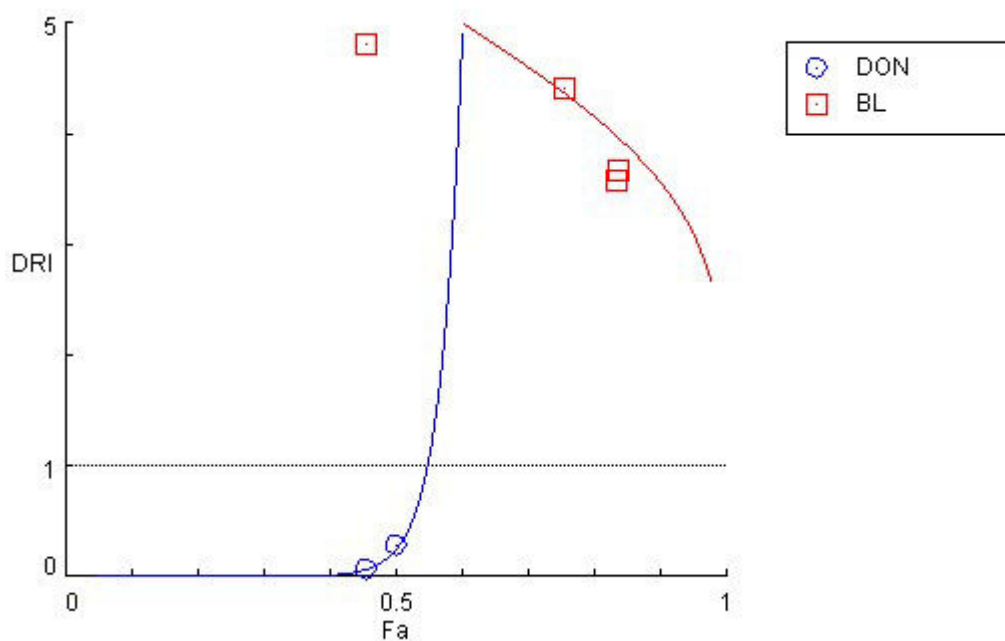

Log(DRI) Plot for Combo: DON-BL (DON+BL [9.7363:1])

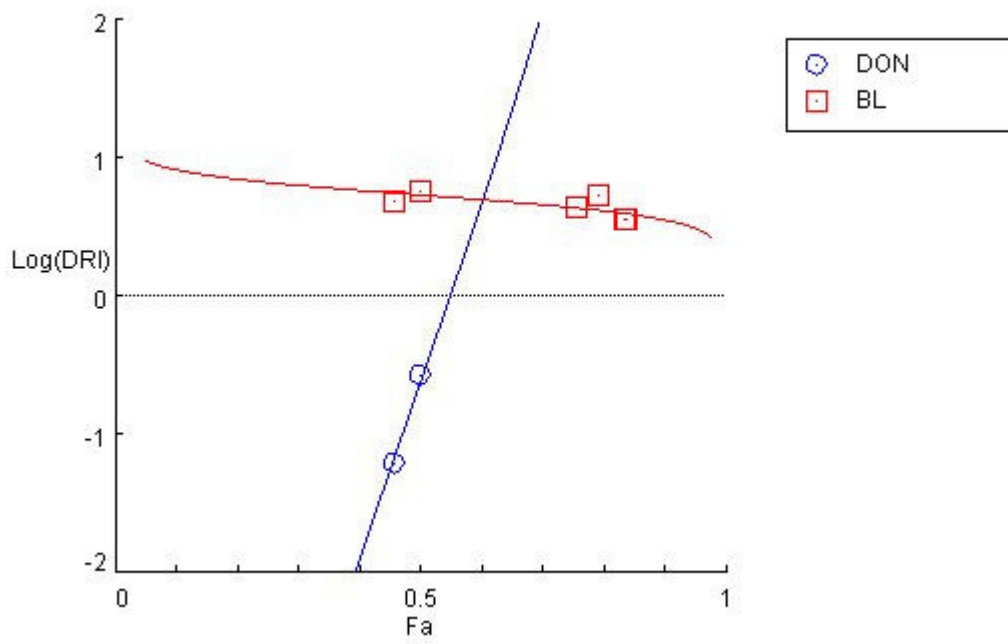

Isobologram for Combo: DON-BL (DON+BL [9.7363:1])

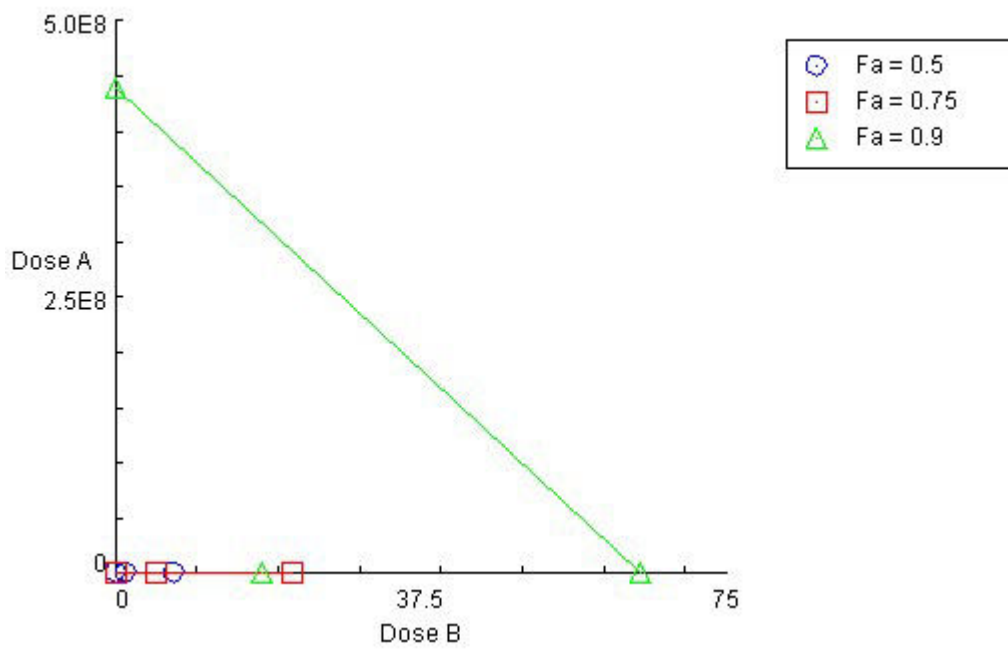

Polygonogram at Fa = 0.9

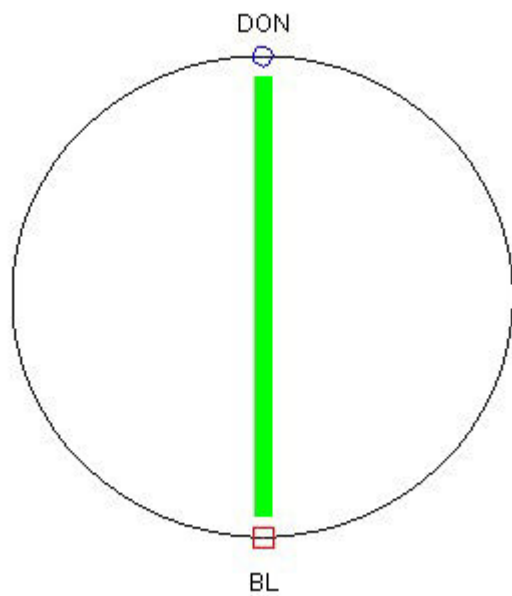

Supplement: cells-10-00202-s001.pdf [file cells-10-00202-s001.pdf]
